# Supplementary material for: Donghaecyclinones A–C: New Cytotoxic Rearranged Angucyclinones from a Volcanic Island-Derived Marine Streptomyces sp
Source: PubMed Central journal article supplement (PMC7073551; doi:10.3390/md18020121), 2020-02-18
Supplement: marinedrugs-18-00121-s001.pdf [file marinedrugs-18-00121-s001.pdf]

## *Supplementary Materials*

# **Donghaecyclinones A–C: New Cytotoxic Rearranged Angucyclinones from a Volcanic Island-Derived Marine *Streptomyces* sp.**

Munhyung Bae<sup>1</sup>, Joon Soo An<sup>1</sup>, Seong-Heon Hong<sup>1</sup>, Eun Seo Bae<sup>1</sup>, Beomkoo Chung<sup>2</sup>, Yun Kwon<sup>1</sup>, Suckchang Hong<sup>3</sup>, Ki-Bong Oh<sup>2</sup>, Jongheon Shin<sup>1</sup>, Sang Kook Lee<sup>1</sup>, and Dong-Chan Oh<sup>1,\*</sup>

<sup>1</sup> Natural Products Research Institute, College of Pharmacy, Seoul National University, Seoul 08826, Republic of Korea; [baemoon89@snu.ac.kr](mailto:baemoon89@snu.ac.kr) (M.B.); [ahnjunsoo@snu.ac.kr](mailto:ahnjunsoo@snu.ac.kr) (J.S.A.); [sung954@snu.ac.kr](mailto:sung954@snu.ac.kr) (S.-H.H.); [ddol1289@snu.ac.kr](mailto:ddol1289@snu.ac.kr) (E.S.B.); [kisi2016@snu.ac.kr](mailto:kisi2016@snu.ac.kr) (Y.K.); [sklee61@snu.ac.kr](mailto:sklee61@snu.ac.kr) (S.K.L.); [shinj@snu.ac.kr](mailto:shinj@snu.ac.kr) (J.S.)

<sup>2</sup> Department of Agricultural Biotechnology, College of Agriculture & Life Sciences, Seoul National University, Seoul 08826, Republic of Korea; [beomkoo01@snu.ac.kr](mailto:beomkoo01@snu.ac.kr) (B.C.); [ohkibong@snu.ac.kr](mailto:ohkibong@snu.ac.kr) (K.-B.O.)

<sup>3</sup> Research Institute of Pharmaceutical Sciences, College of Pharmacy, Seoul National University, Seoul 08826, Republic of Korea; [schong17@snu.ac.kr](mailto:schong17@snu.ac.kr) (S.H.)

\* Correspondence: [dongchanoh@snu.ac.kr](mailto:dongchanoh@snu.ac.kr); Tel.: +82-2880-2491

## Table of Contents

- Figure S1.  $^1\text{H}$  NMR spectrum (600 MHz) of donghaecyclinone A (**1**) in  $\text{DMSO}-d_6$ .
- Figure S2.  $^{13}\text{C}$  NMR spectrum (150 MHz) of donghaecyclinone A (**1**) in  $\text{DMSO}-d_6$ .
- Figure S3. COSY spectrum (600 MHz) of donghaecyclinone A (**1**) in  $\text{DMSO}-d_6$ .
- Figure S4. HSQC spectrum (600 MHz) of donghaecyclinone A (**1**) in  $\text{DMSO}-d_6$ .
- Figure S5. HMBC spectrum (600 MHz) of donghaecyclinone A (**1**) in  $\text{DMSO}-d_6$ .
- Figure S6. ROESY spectrum (600 MHz) of donghaecyclinone A (**1**) in  $\text{DMSO}-d_6$ .
- Figure S7. IR spectrum of donghaecyclinone A (**1**).
- Figure S8.  $^1\text{H}$  NMR spectrum (800 MHz) of *S*-MTPA ester (**1a**) of **1** in  $\text{DMSO}-d_6$ .
- Figure S9. COSY spectrum (800 MHz) of *S*-MTPA ester (**1a**) of **1** in  $\text{DMSO}-d_6$ .
- Figure S10.  $^1\text{H}$  NMR spectrum (800 MHz) of *R*-MTPA ester (**1b**) of **1** in  $\text{DMSO}-d_6$ .
- Figure S11. COSY spectrum (800 MHz) of *R*-MTPA ester (**1b**) of **1** in  $\text{DMSO}-d_6$ .
- Figure S12.  $^1\text{H}$  NMR spectrum (600 MHz) of donghaecyclinone B (**2**) in acetone- $d_6$ .
- Figure S13.  $^{13}\text{C}$  NMR spectrum (150 MHz) of donghaecyclinone B (**2**) in acetone- $d_6$ .
- Figure S15. COSY spectrum (600 MHz) of donghaecyclinone B (**2**) in acetone- $d_6$ .
- Figure S16. HSQC spectrum (600 MHz) of donghaecyclinone B (**2**) in acetone- $d_6$ .
- Figure S17. HMBC spectrum (600 MHz) of donghaecyclinone B (**2**) in acetone- $d_6$ .
- Figure S18. ROESY spectrum (600 MHz) of donghaecyclinone B (**2**) in acetone- $d_6$ .
- Figure S19. IR spectrum of donghaecyclinone B (**2**).
- Figure S20.  $^1\text{H}$  NMR spectrum (600 MHz) of donghaecyclinone B (**3**) in acetone- $d_6$ .
- Figure S21.  $^{13}\text{C}$  NMR spectrum (150 MHz) of donghaecyclinone C (**3**) in acetone- $d_6$ .
- Figure S22. COSY spectrum (600 MHz) of donghaecyclinone C (**3**) in acetone- $d_6$ .
- Figure S23. HSQC spectrum (600 MHz) of donghaecyclinone C (**3**) in acetone- $d_6$ .
- Figure S24. HMBC spectrum (600 MHz) of donghaecyclinone C (**3**) in acetone- $d_6$ .
- Figure S25. ROESY spectrum (600 MHz) of donghaecyclinone C (**3**) in acetone- $d_6$ .
- Figure S26. IR spectrum of donghaecyclinone C (**3**).
- Figure S27. Key ROESY correlations of donghaecyclinone B (**2**).
- Figure S28. Key ROESY correlations of donghaecyclinone C (**3**).
- Figure S29. LC/MS chromatogram of the extract of the bacterial strain *Streptomyces* sp. SUD119 and purified donghaecyclinones A-C (**1-3**).
- Figure S30. Cytotoxicity result of donghaecyclinones A-C (**1-3**) against five cancer cell lines.
- Table S1. The major conformers of diastereomers **1c-1d** on donghaecyclinone A (**1**) identified by conformational searches in MMFF94 force field using MacroModel.
- Table S2. The major conformers of diastereomers **2a/3b** identified by conformational searches in MMFF94 force field using MacroModel.
- Table S3. The major conformers of diastereomers **2b/3a** identified by conformational searches in MMFF94 force field using MacroModel.
- Table S4. Experimental (Exp.) and calculated (Cal.) chemical shift values (CS,  $\delta$ ) of diastereomers **1c-1d** on donghaecyclinone A (**1**).
- Table S5. Experimental (Exp.) and calculated (Cal.) chemical shift values (CS,  $\delta$ ) of

diastereomers **2a/3b–2b/3a** on donghaecyclinones B and C (**2** and **3**).

Cartesian coordinates of the conformers shown in Table S4.

Cartesian coordinates of the conformers shown in Table S5.

Table S6. ECD calculation of donghaecyclinone B (**2c**).

Table S7. ECD calculation of *ent*-donghaecyclinone B (**2d**).

Table S8. ECD calculation of donghaecyclinone C (**3c**).

Table S9. ECD calculation of *ent*-donghaecyclinone C (**3d**).

Figure S1.  $^1\text{H}$  NMR spectrum (600 MHz) of donghaecyclinone A (**1**) in  $\text{DMSO}-d_6$ .

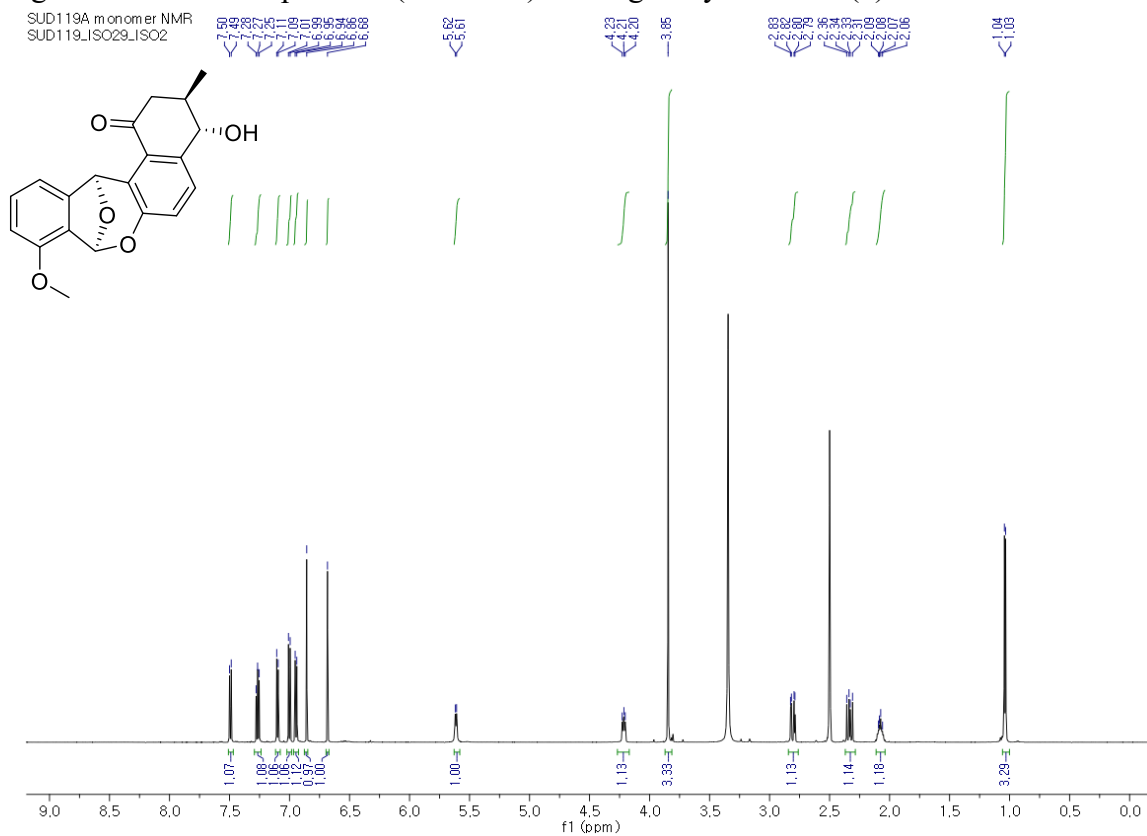

Figure S2.  $^{13}\text{C}$  NMR spectrum (150 MHz) of donghaecyclinone A (**1**) in  $\text{DMSO}-d_6$ .

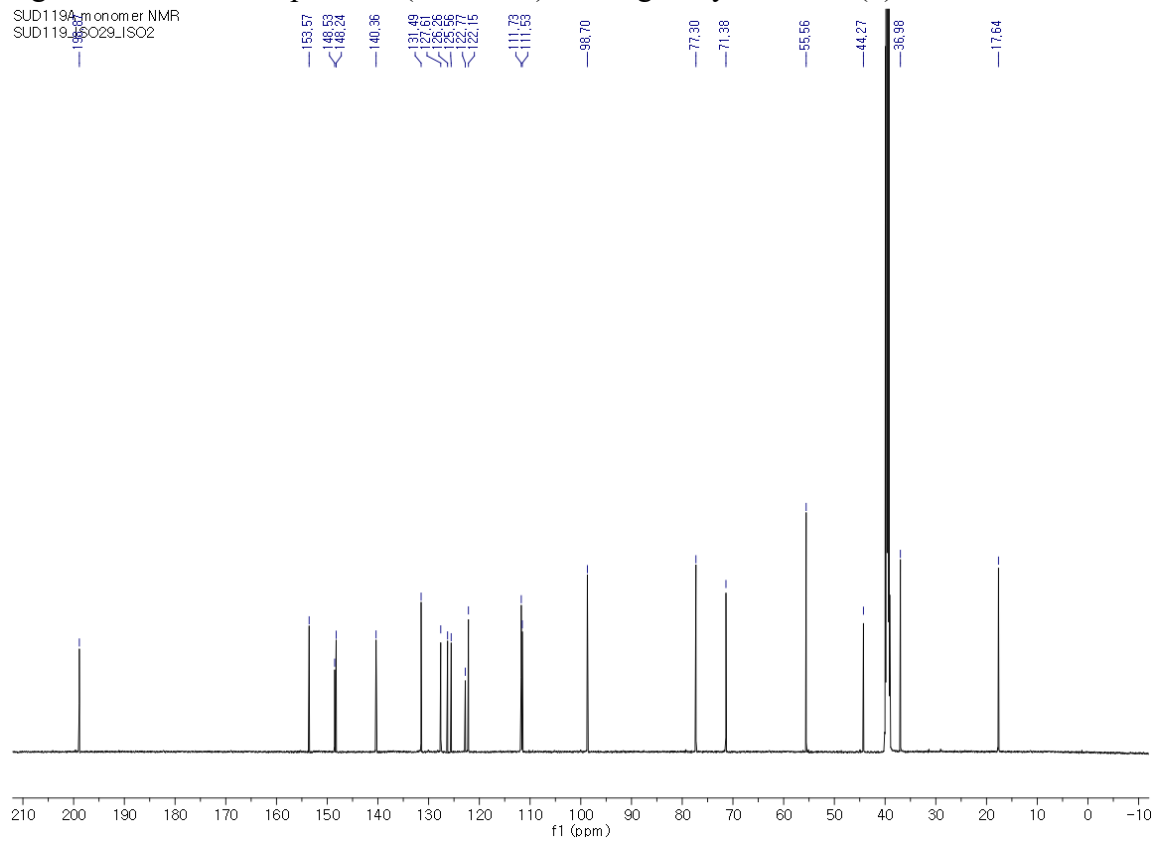

Figure S3. COSY spectrum (600 MHz) of donghaecyclinone A (**1**) in DMSO-*d*<sub>6</sub>.

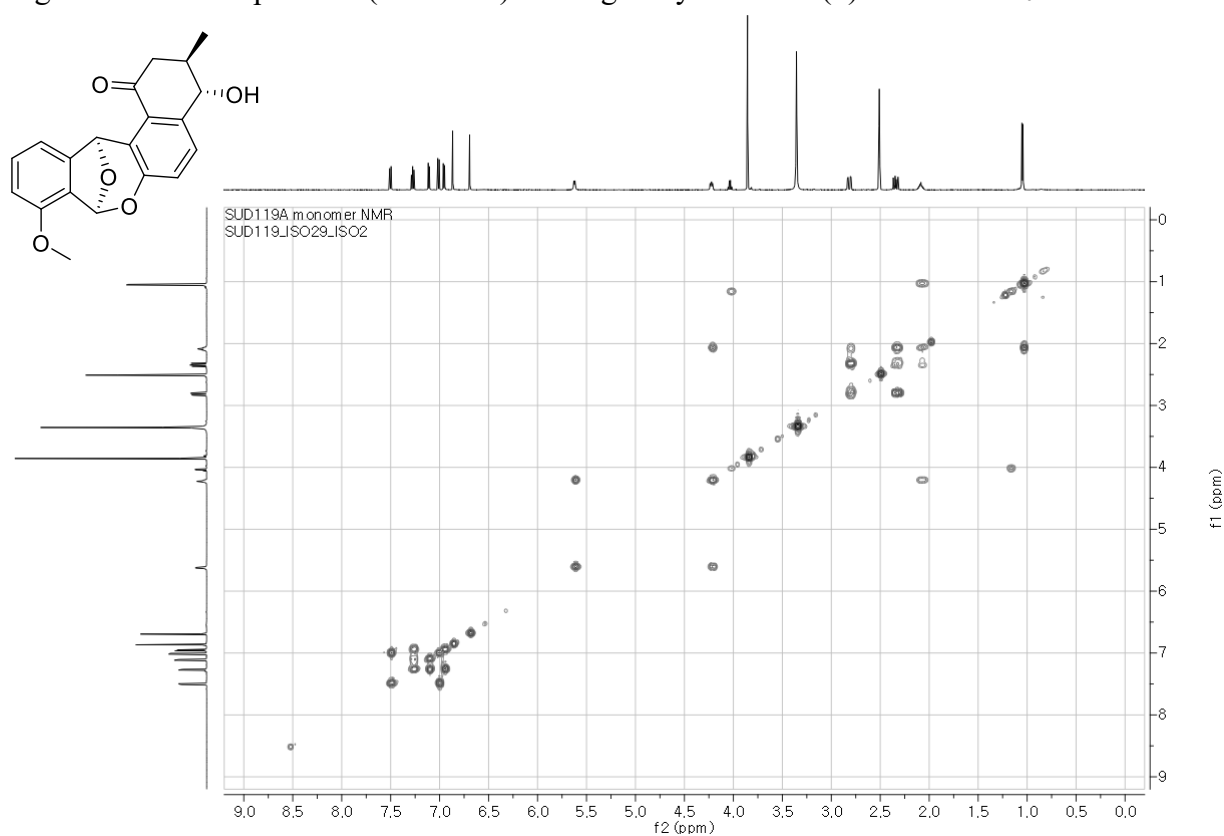

Figure S4. HSQC spectrum (600 MHz) of donghaecyclinone A (**1**) in DMSO-*d*<sub>6</sub>.

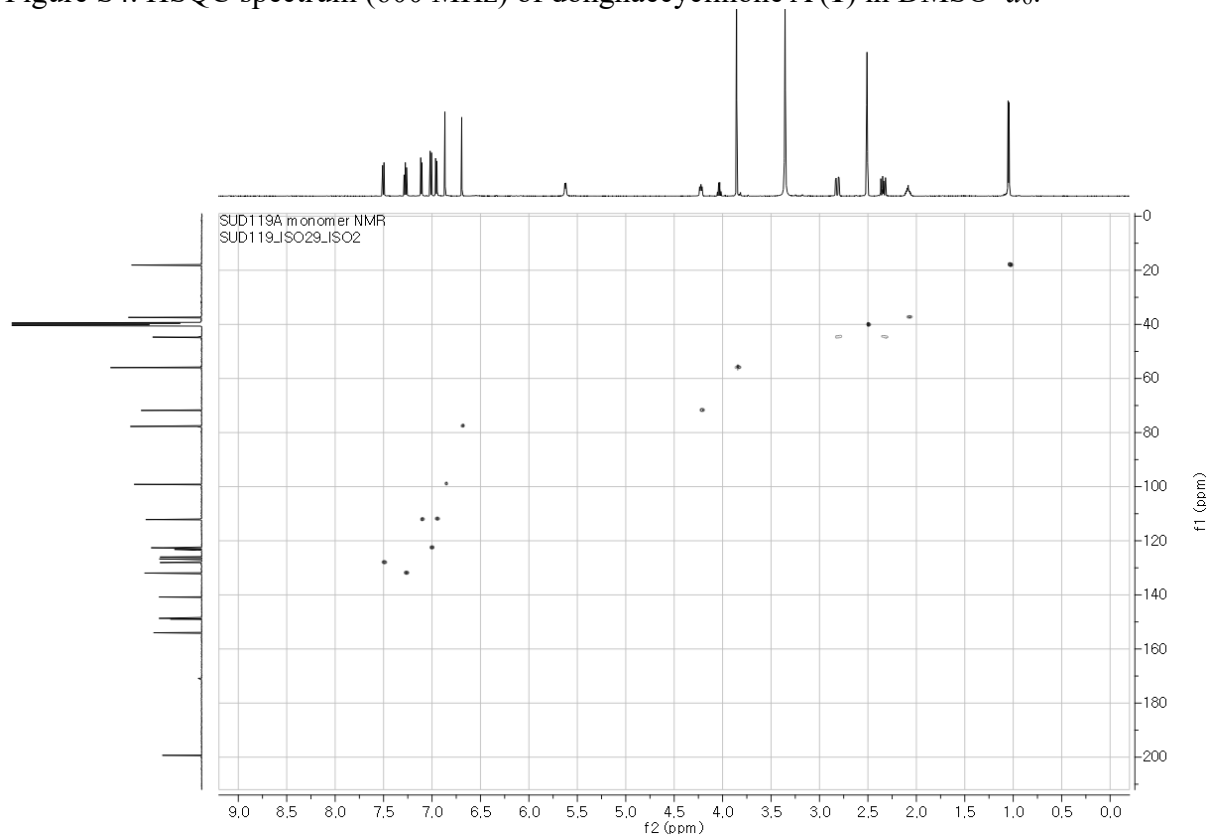

Figure S5. HMBC spectrum (600 MHz) of donghaecyclinone A (**1**) in DMSO-*d*<sub>6</sub>.

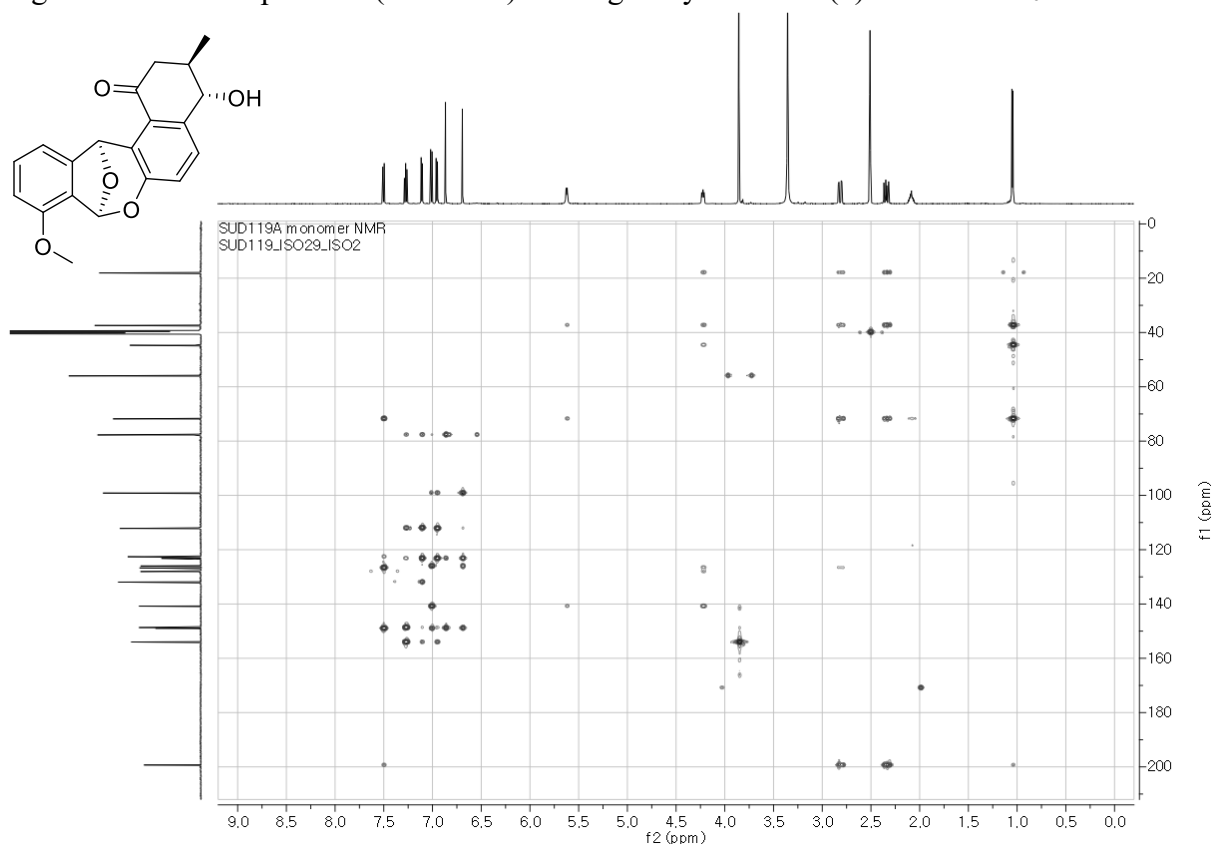

Figure S6. ROESY spectrum (600 MHz) of donghaecyclinone A (**1**) in DMSO-*d*<sub>6</sub>.

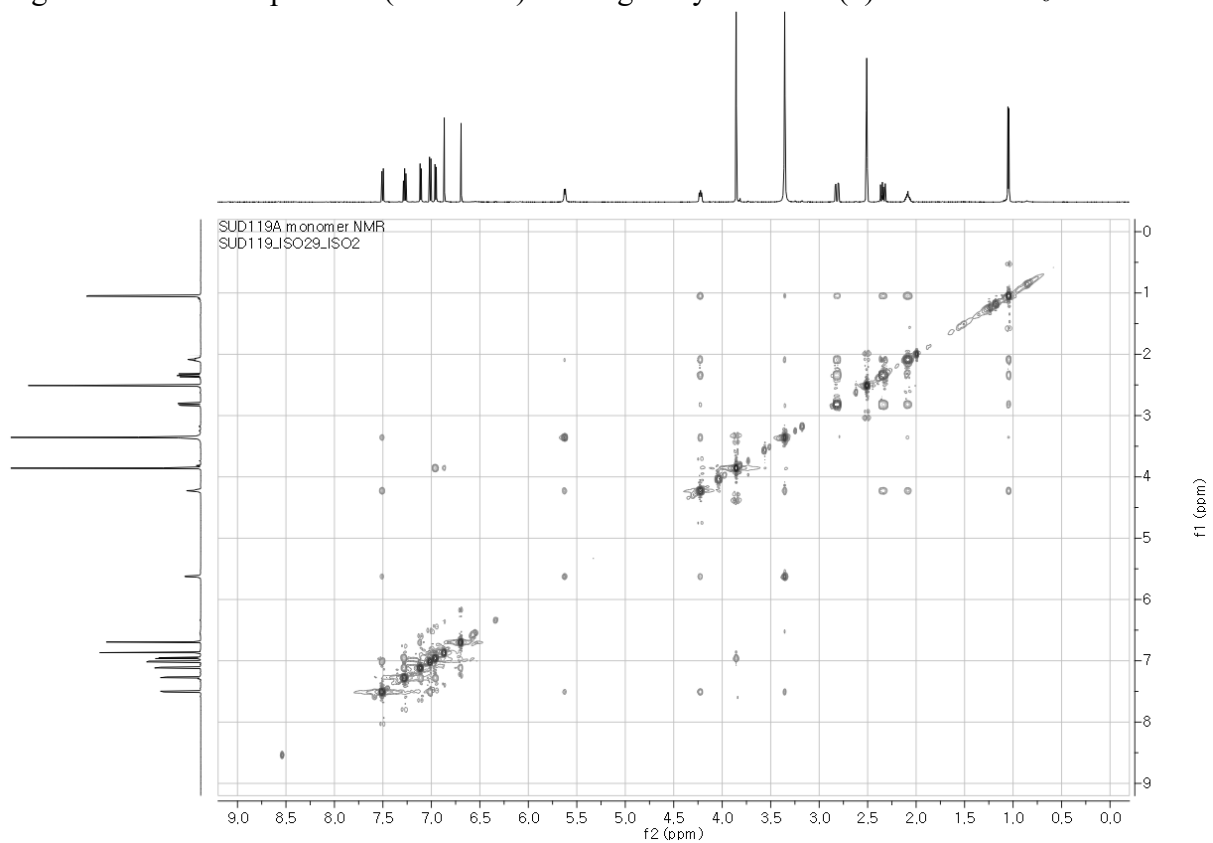

Figure S7. IR spectrum of donghaecyclinone A (1).

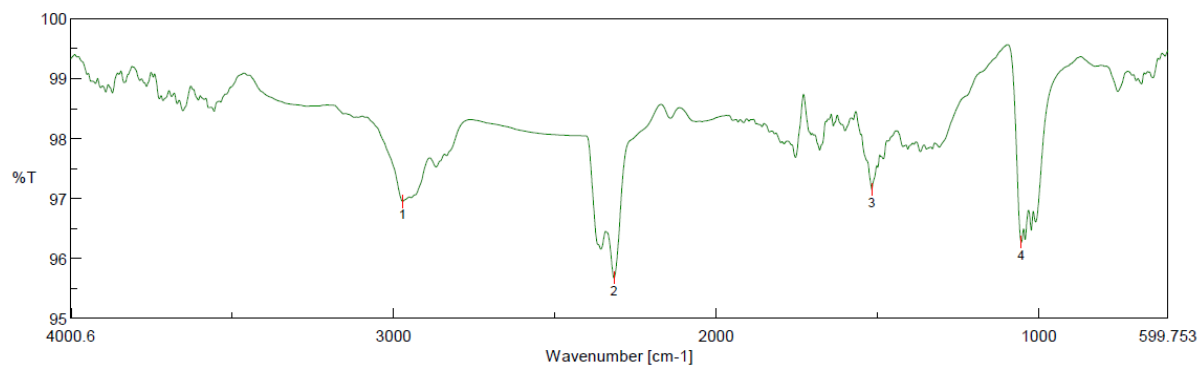

Figure S8.  $^1\text{H}$  NMR spectrum (800 MHz) of *S*-MTPA ester (**1a**) of **1** in  $\text{DMSO}-d_6$ .

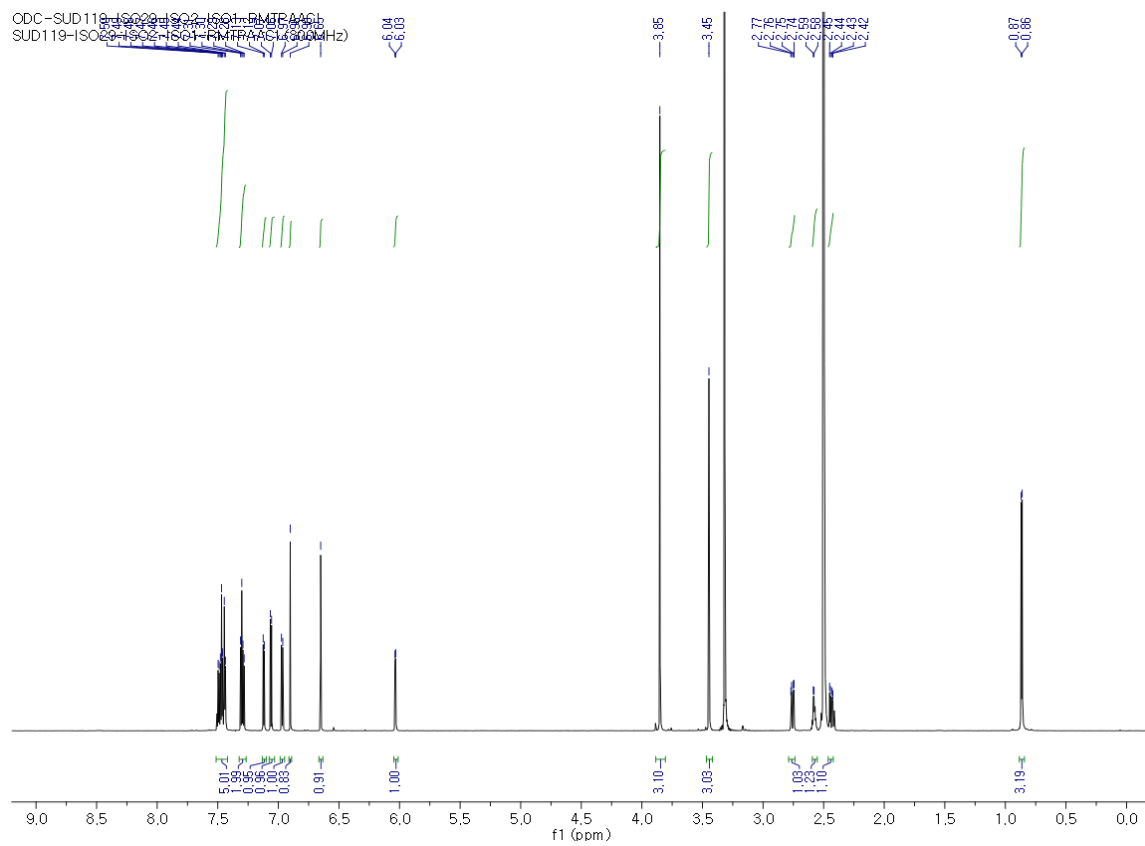

Figure S9. COSY spectrum (800 MHz) of *S*-MTPA ester (**1a**) of **1** in  $\text{DMSO}-d_6$ .

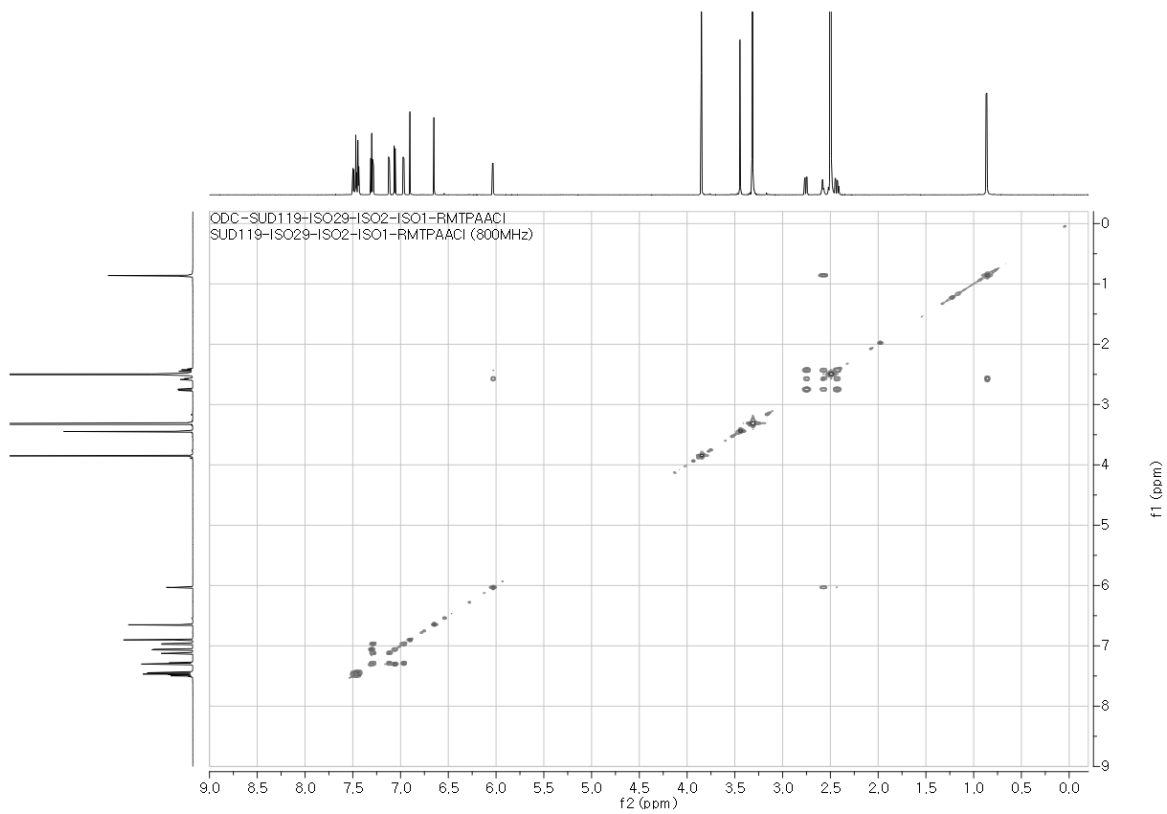



Figure S10.  $^1\text{H}$  NMR spectrum (800 MHz) of *R*-MTPA ester (**1b**) of **1** in  $\text{DMSO-}d_6$ .

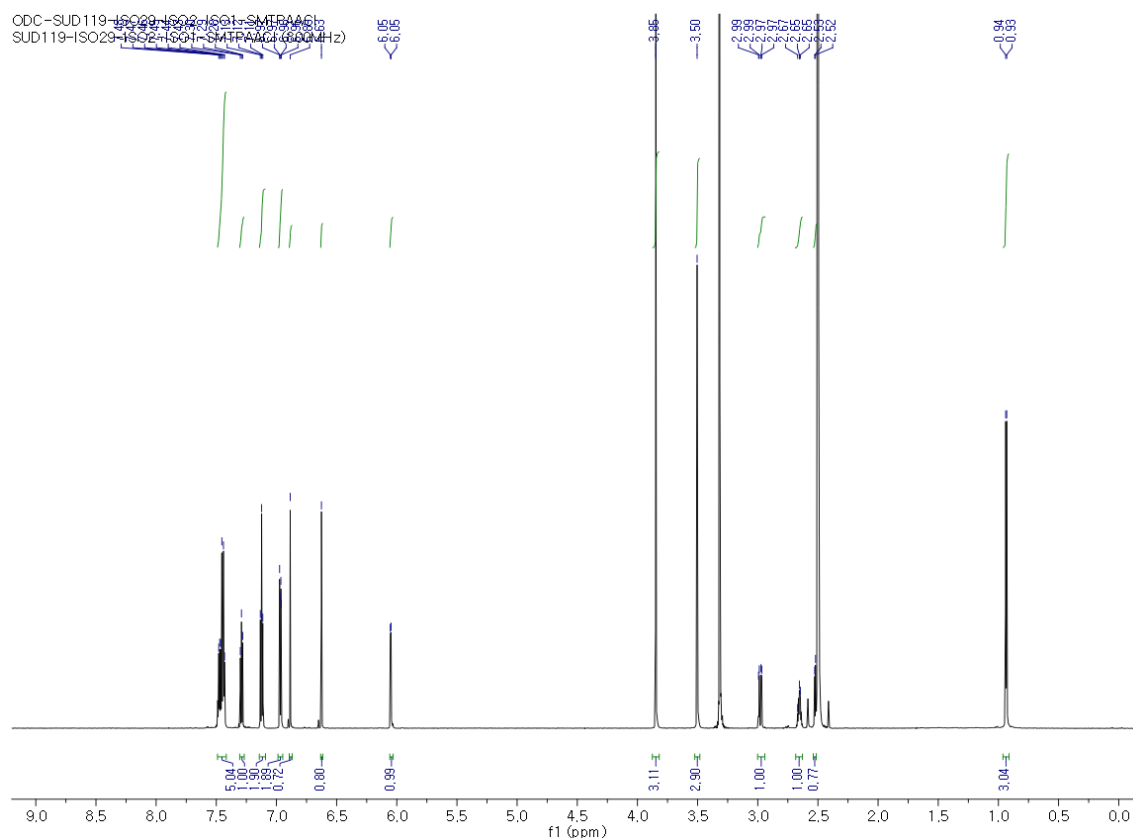

Figure S11. COSY spectrum (800 MHz) of *R*-MTPA ester (**1b**) of **1** in  $\text{DMSO-}d_6$ .

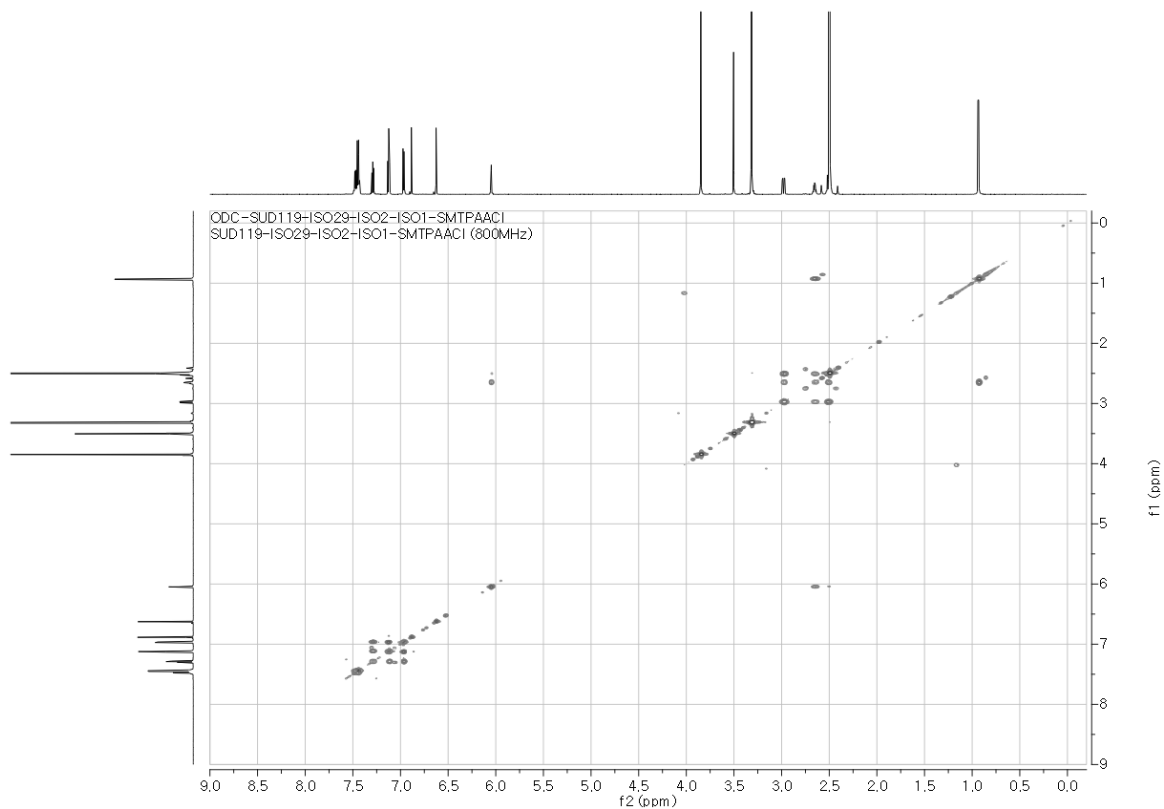

Figure S12.  $^1\text{H}$  NMR spectrum (600 MHz) of donghaecyclinone B (**2**) in acetone- $d_6$ .

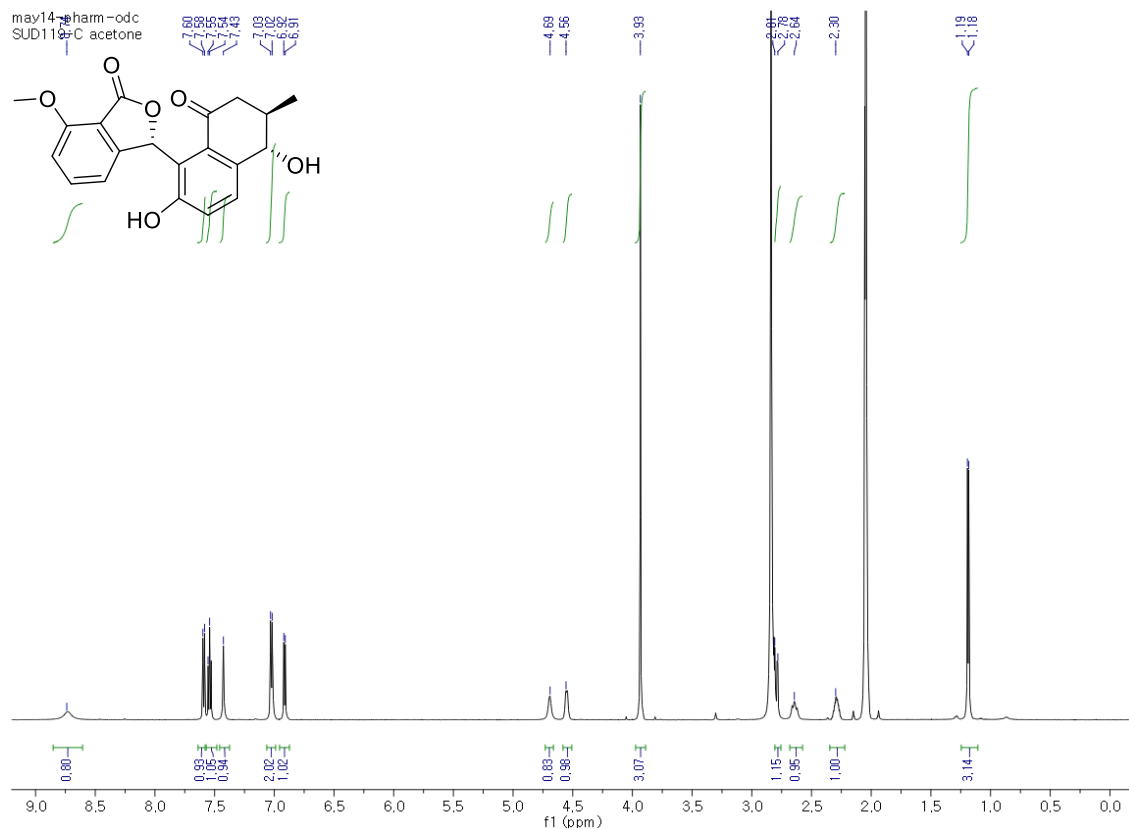

Figure S13.  $^{13}\text{C}$  NMR spectrum (150 MHz) of donghaecyclinone B (**2**) in acetone- $d_6$ .

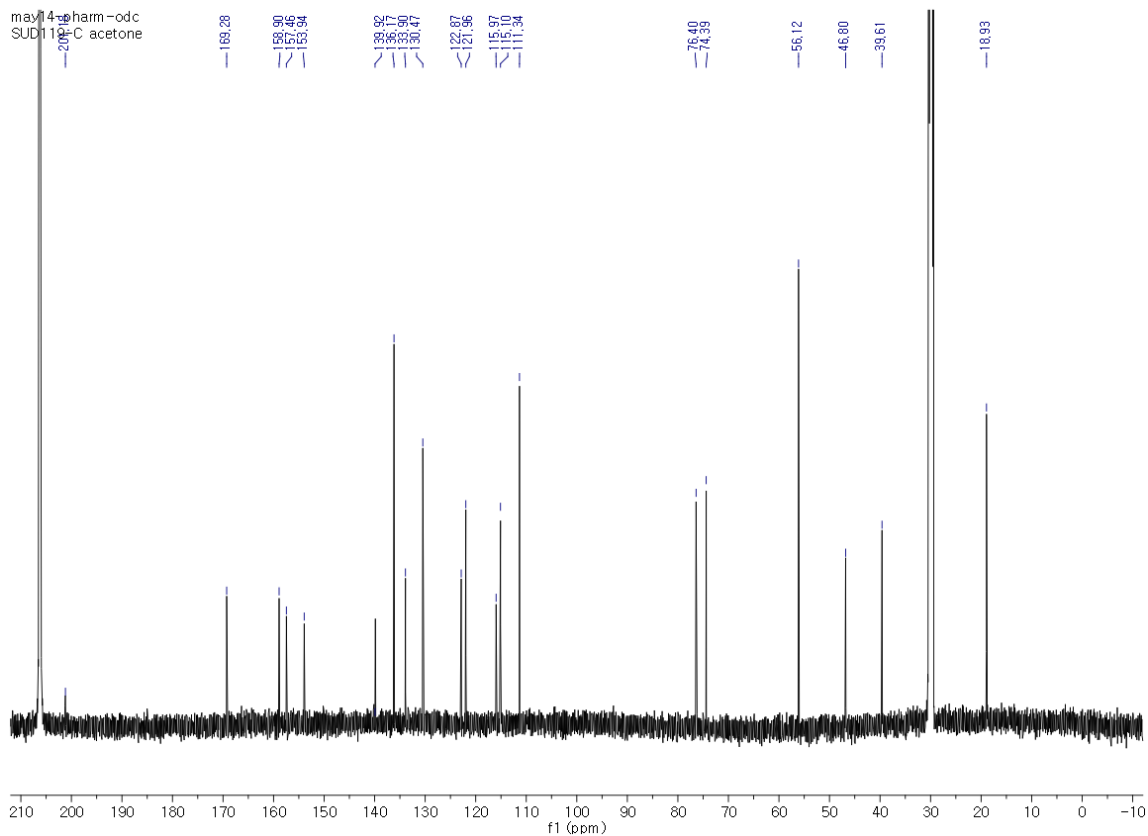

Figure S14. COSY spectrum (600 MHz) of donghaecyclinone B (**2**) in acetone- $d_6$ .

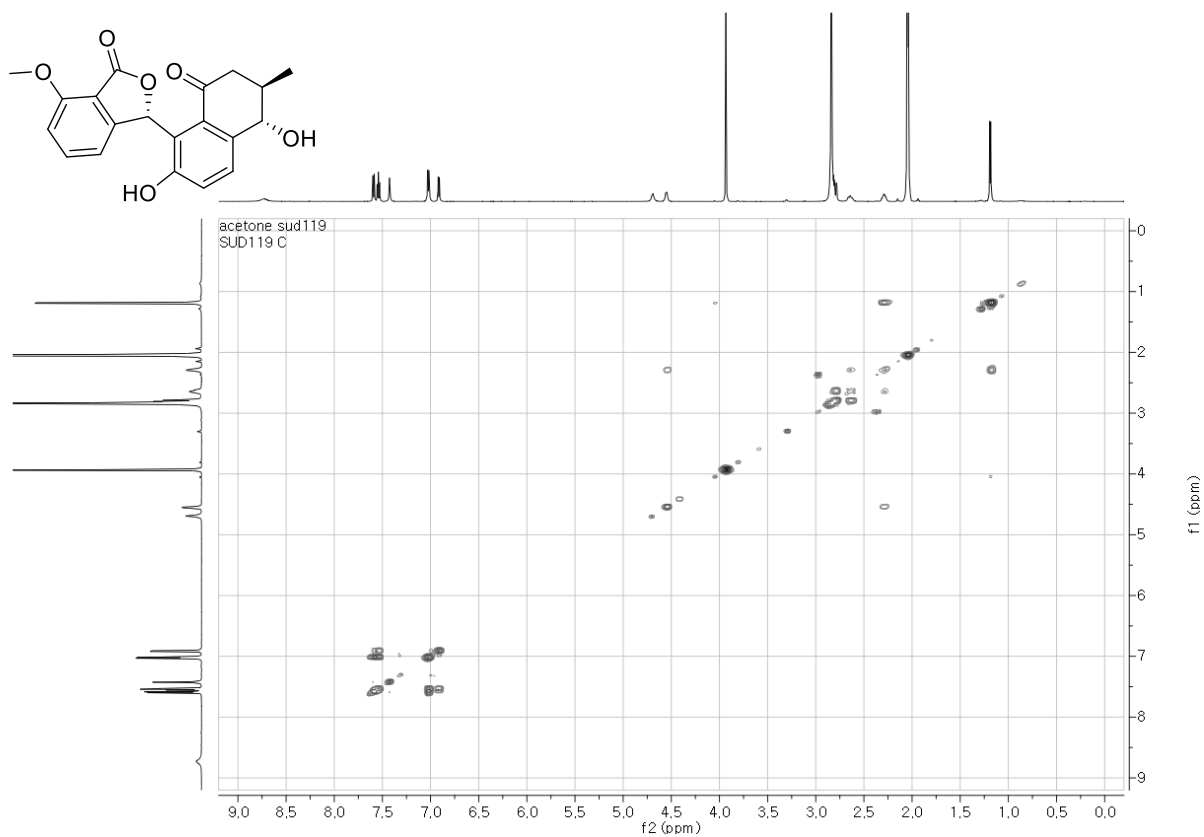

Figure S15. HSQC spectrum (600 MHz) of donghaecyclinone B (**2**) in acetone- $d_6$ .

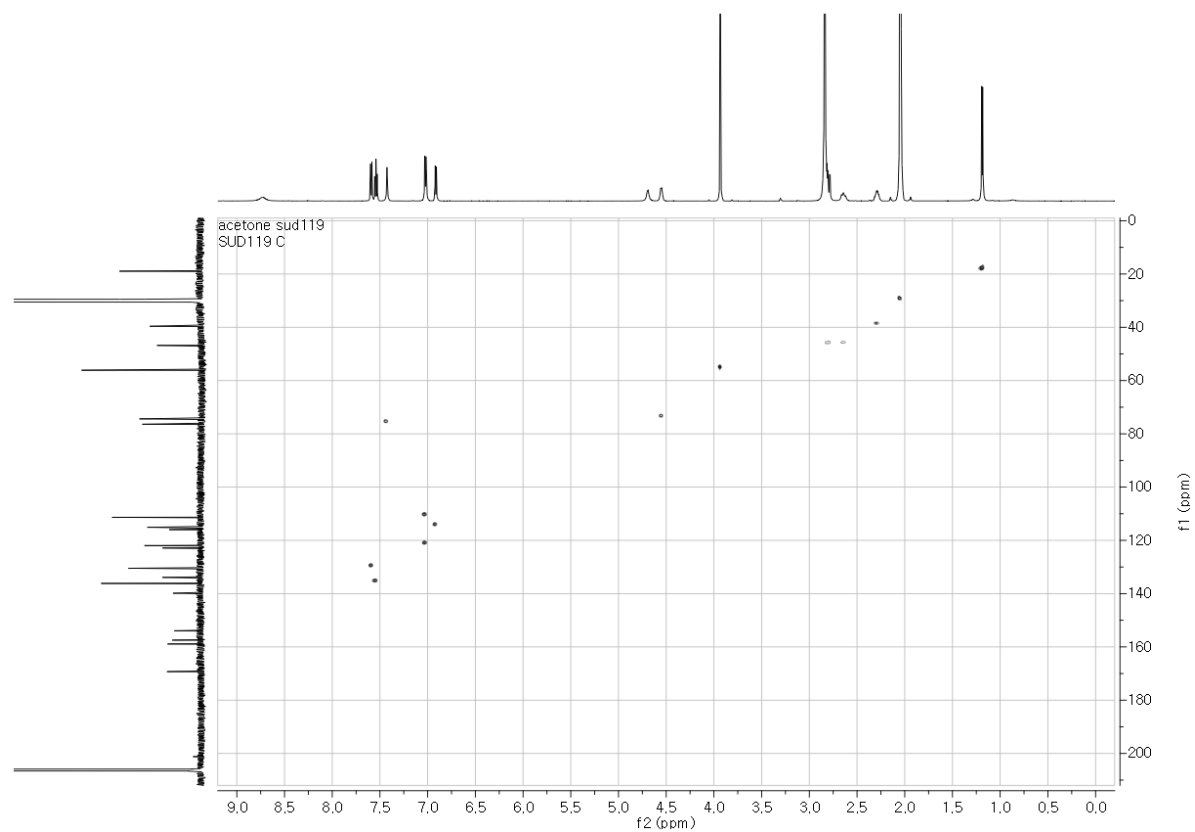

Figure S17. HMBC spectrum (600 MHz) of donghaecyclinone B (**2**) in acetone-*d*<sub>6</sub>.

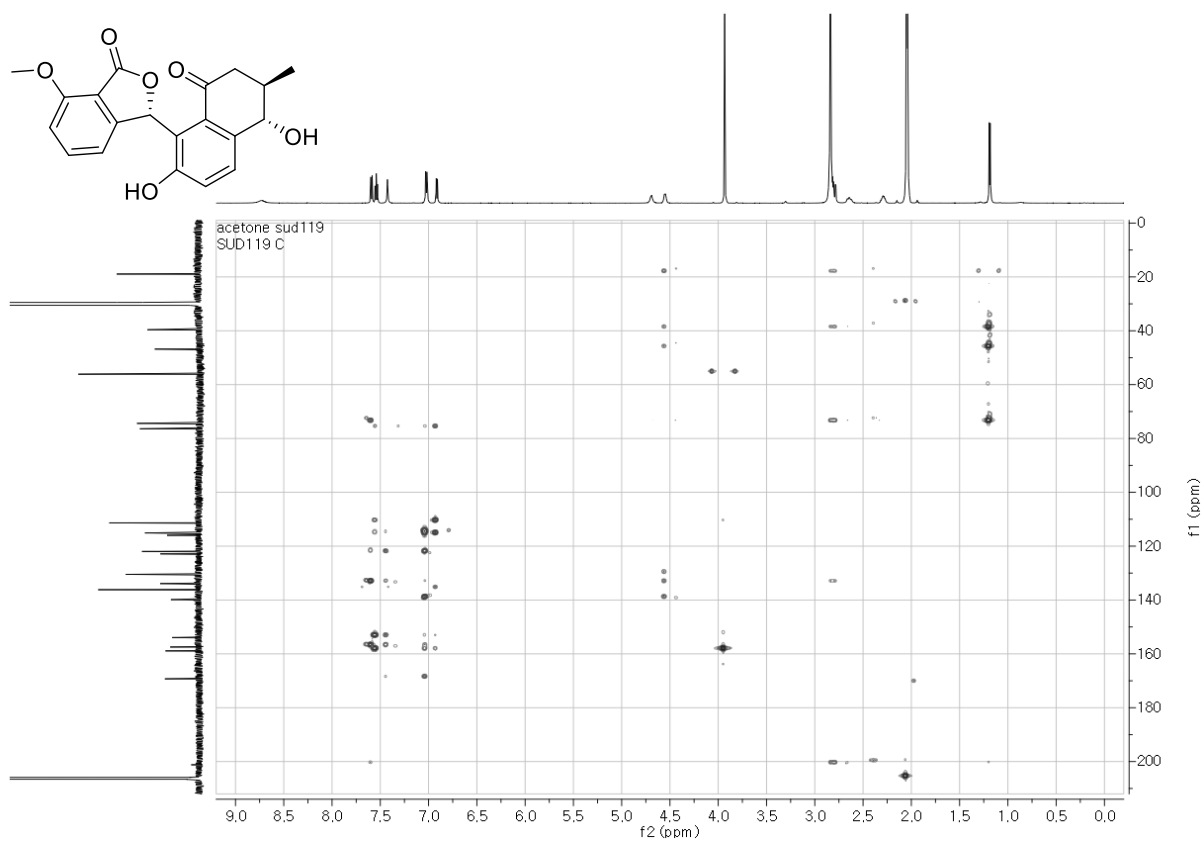

Figure S18. ROESY spectrum (600 MHz) of donghaecyclinone B (**2**) in acetone-*d*<sub>6</sub>.

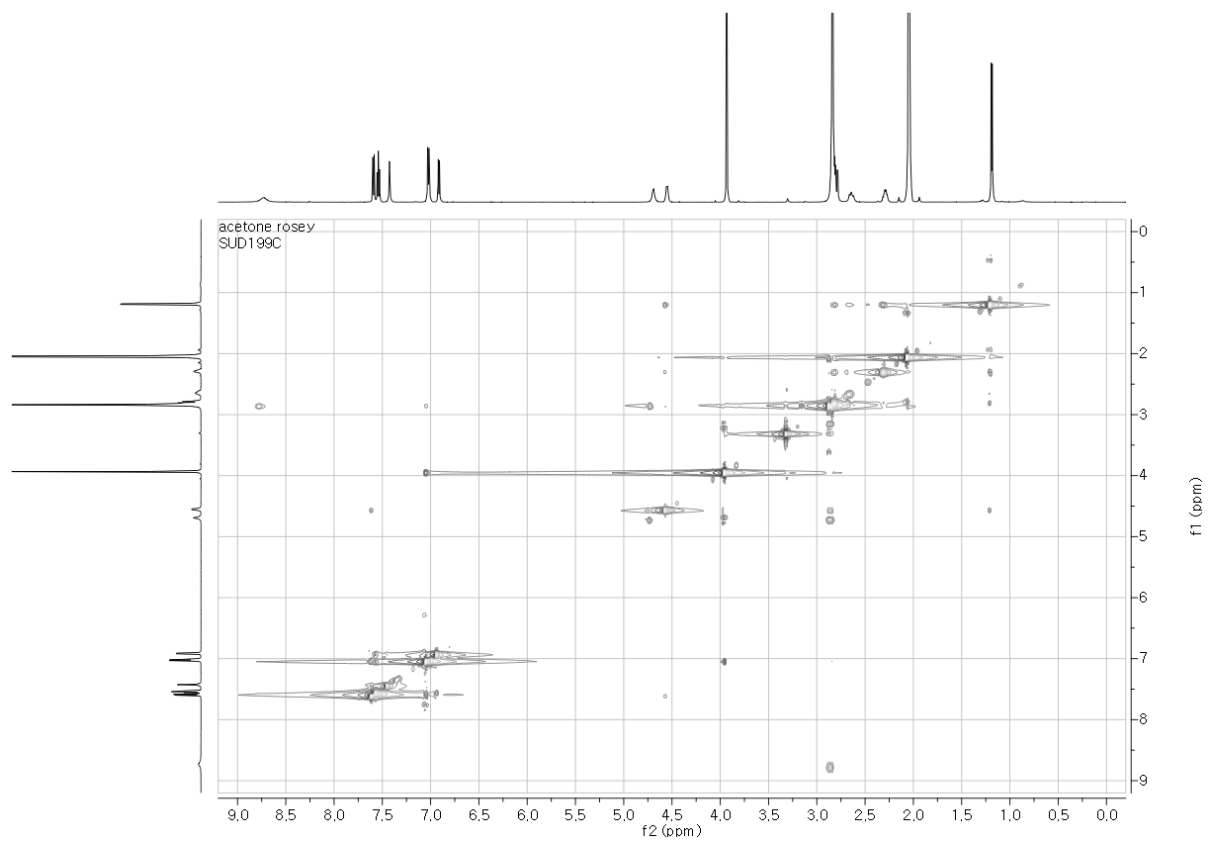

Figure S19. IR spectrum of donghaecyclinone B (**2**).

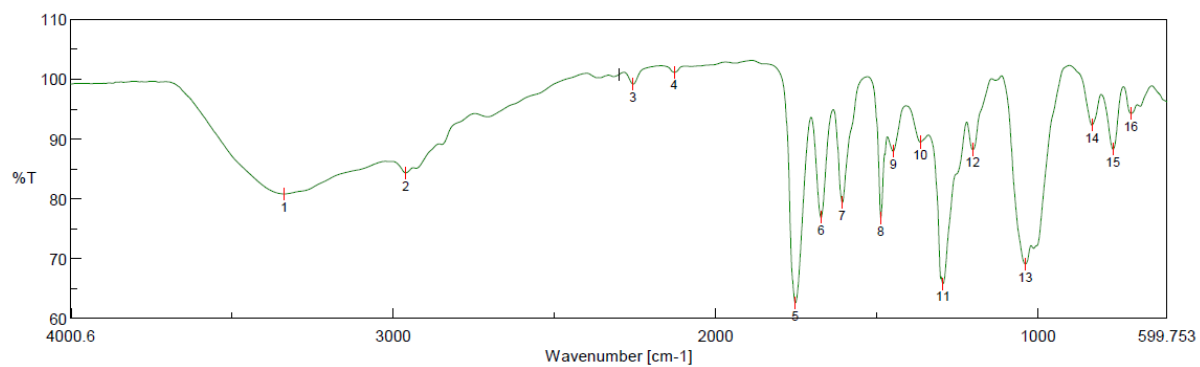

Figure S20.  $^1\text{H}$  NMR spectrum (600 MHz) of donghaecyclinone C (**3**) in acetone- $d_6$ .

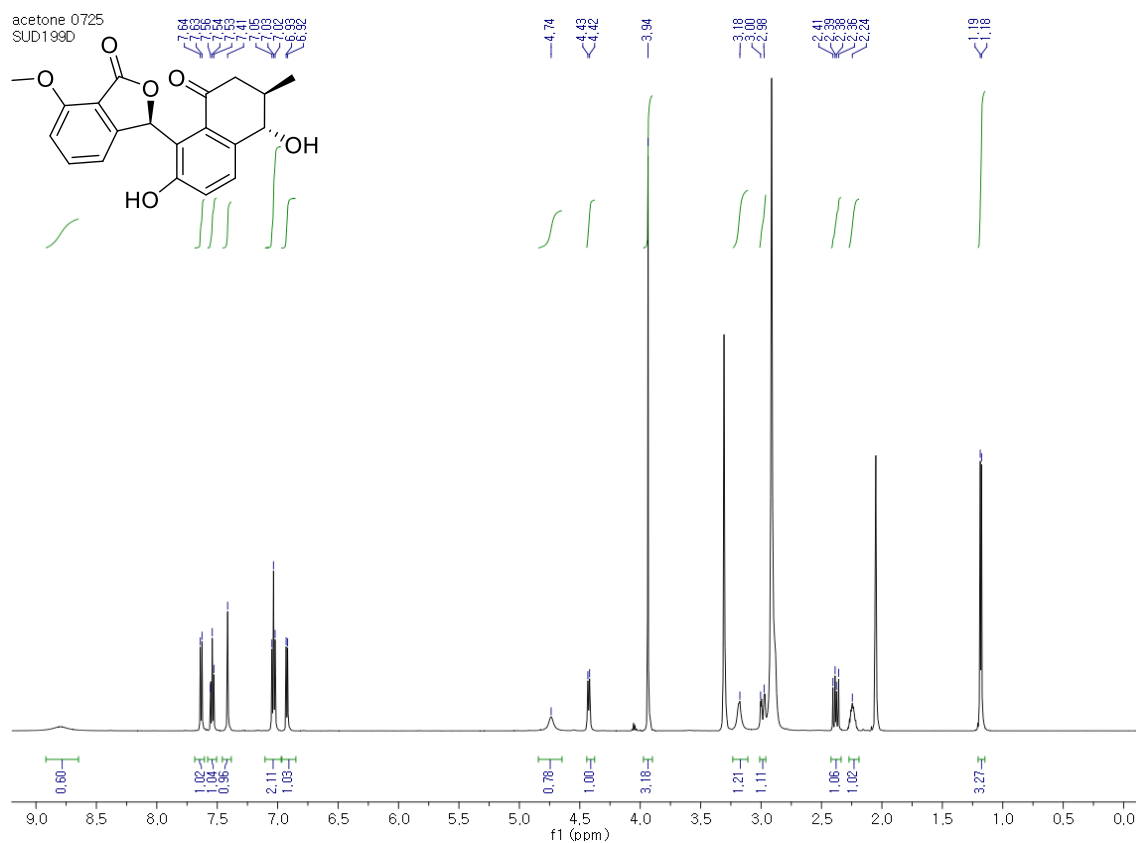

Figure S21.  $^{13}\text{C}$  NMR spectrum (150 MHz) of donghaecyclinone C (**3**) in acetone- $d_6$ .

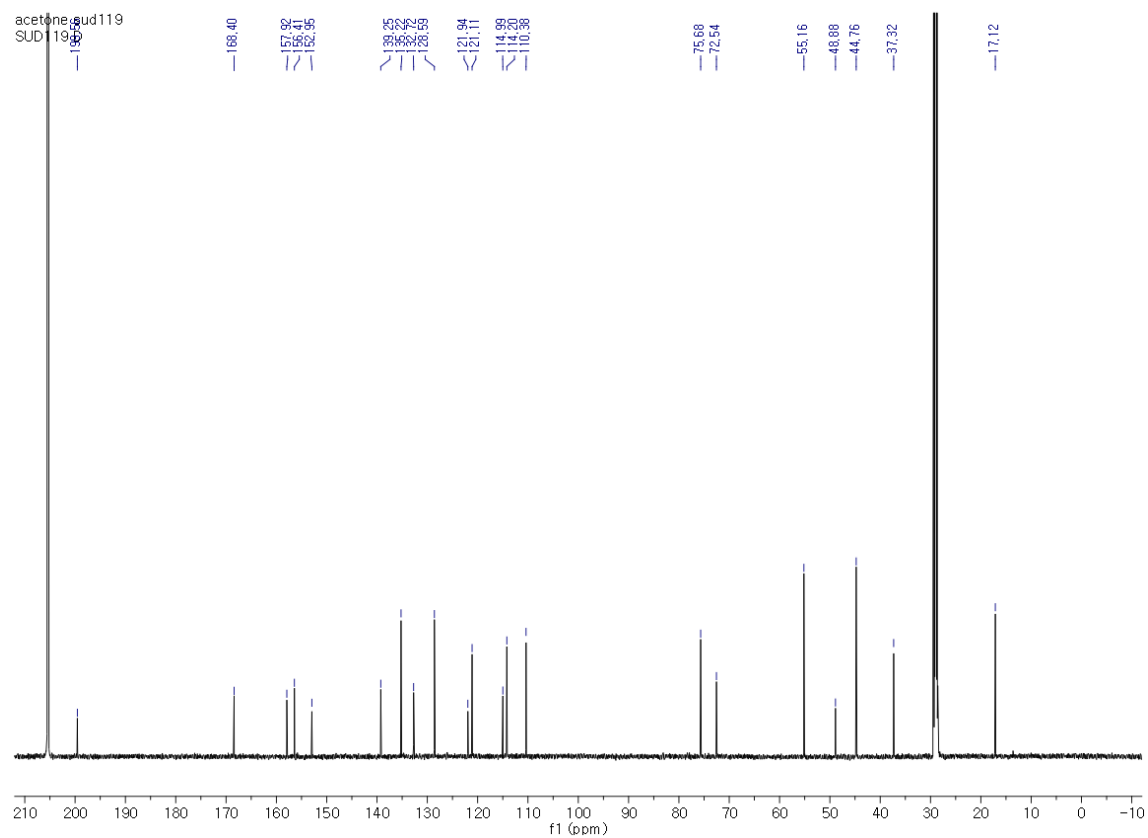

Figure S22. COSY spectrum (600 MHz) of donghaecyclinone C (**3**) in acetone-*d*<sub>6</sub>.

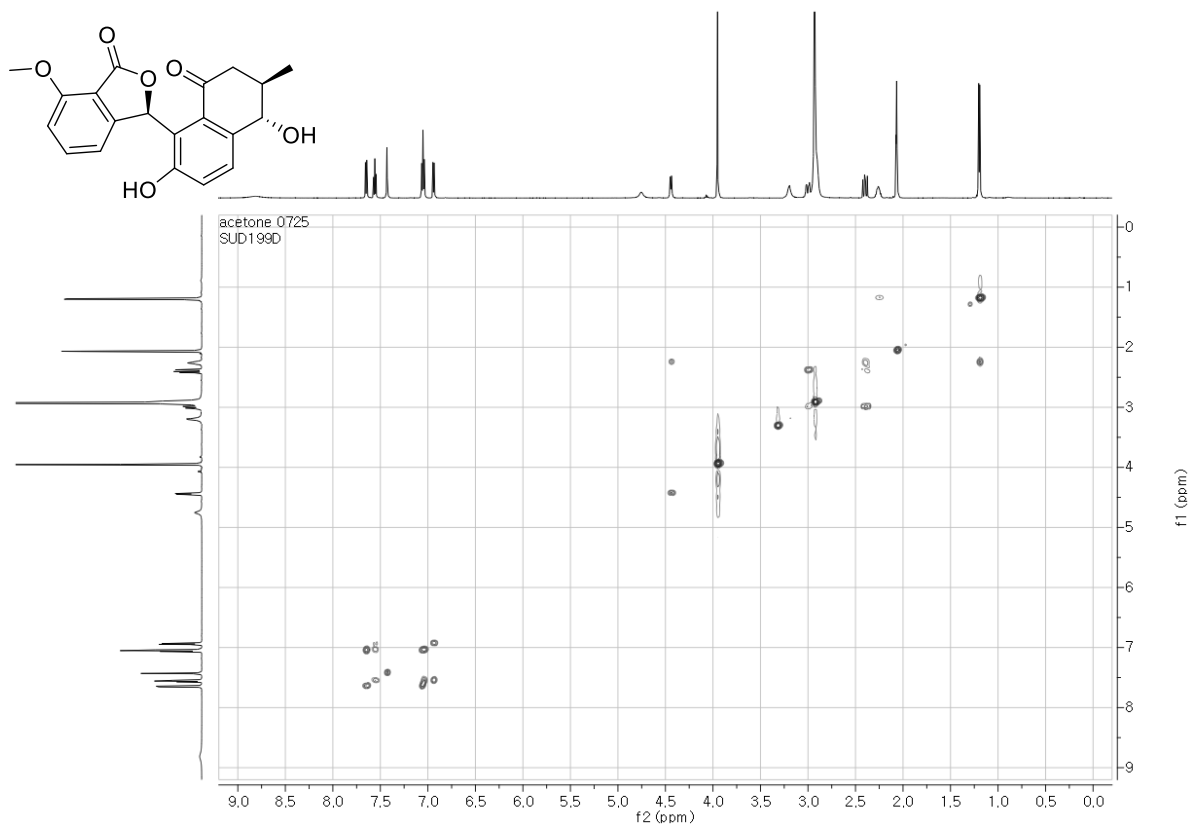

Figure S23. HSQC spectrum (600 MHz) of donghaecyclinone C (**3**) in acetone-*d*<sub>6</sub>.

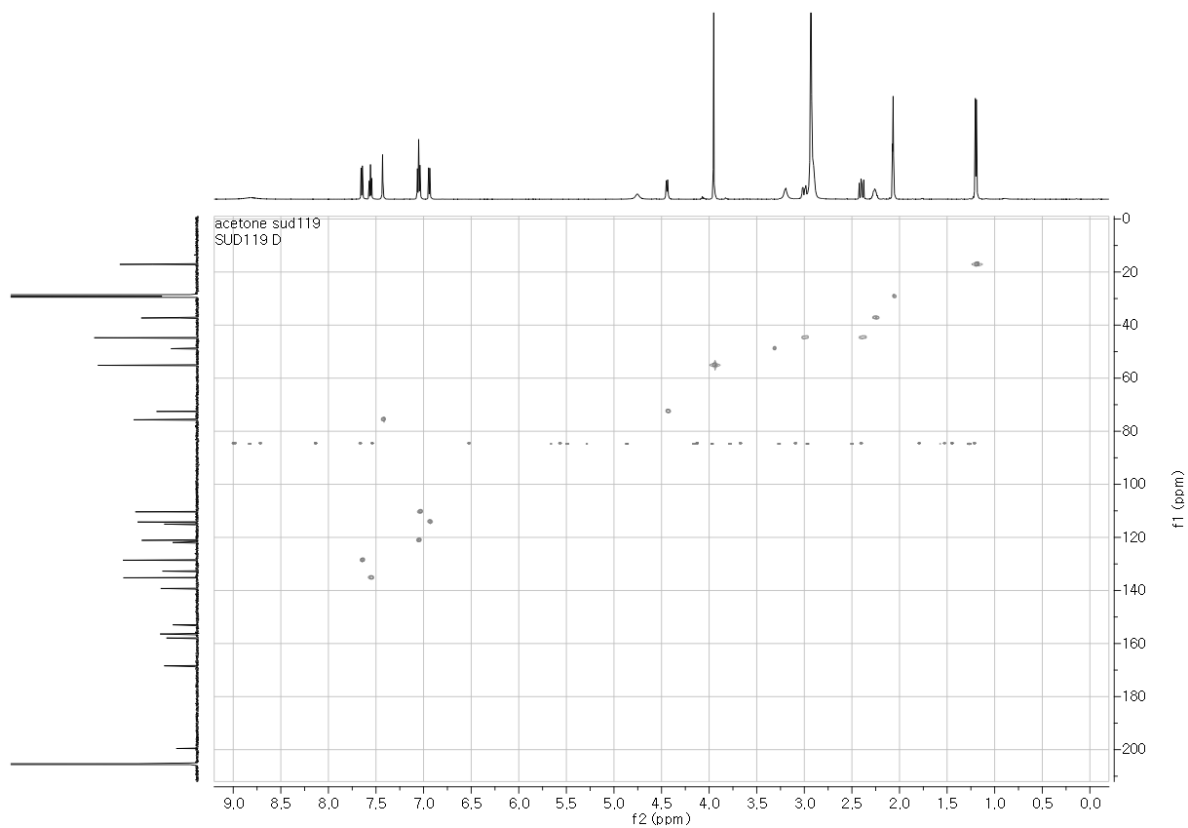

Figure S24. HMBC spectrum (600 MHz) of donghaecyclinone C (**3**) in acetone- $d_6$ .

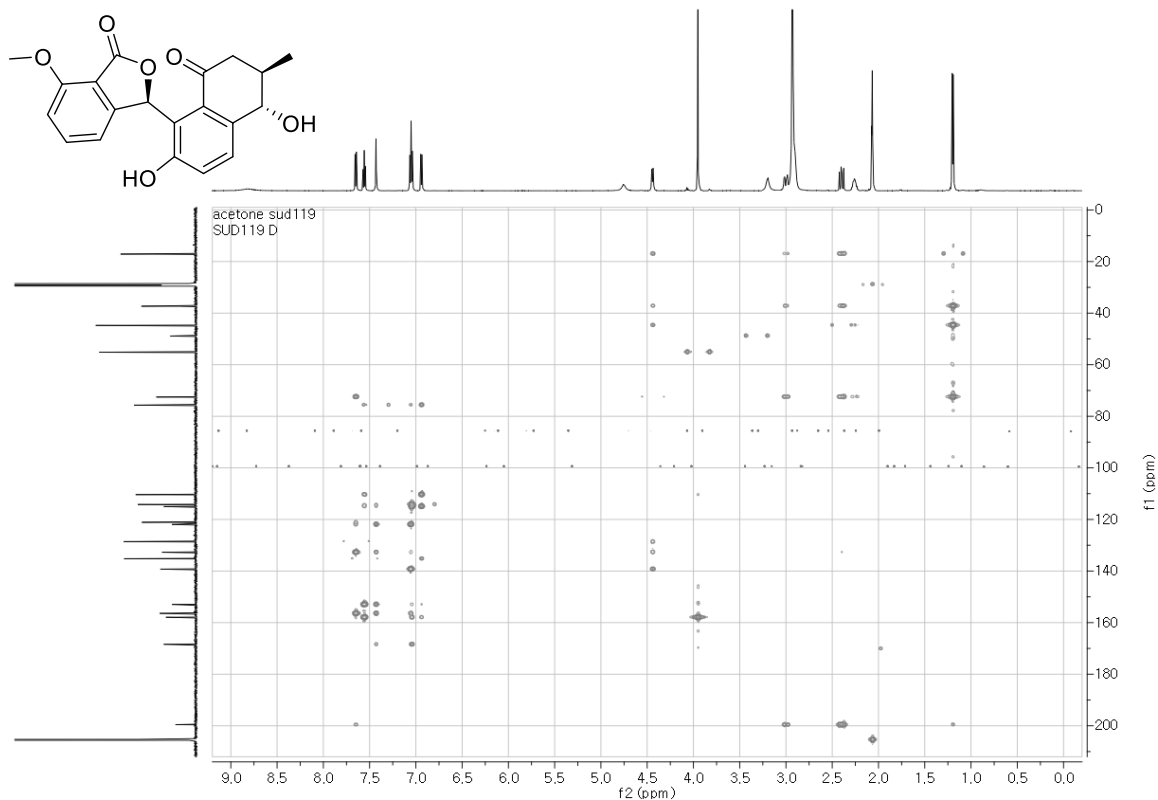

Figure S25. ROESY spectrum (600 MHz) of donghaecyclinone C (**3**) in acetone- $d_6$ .

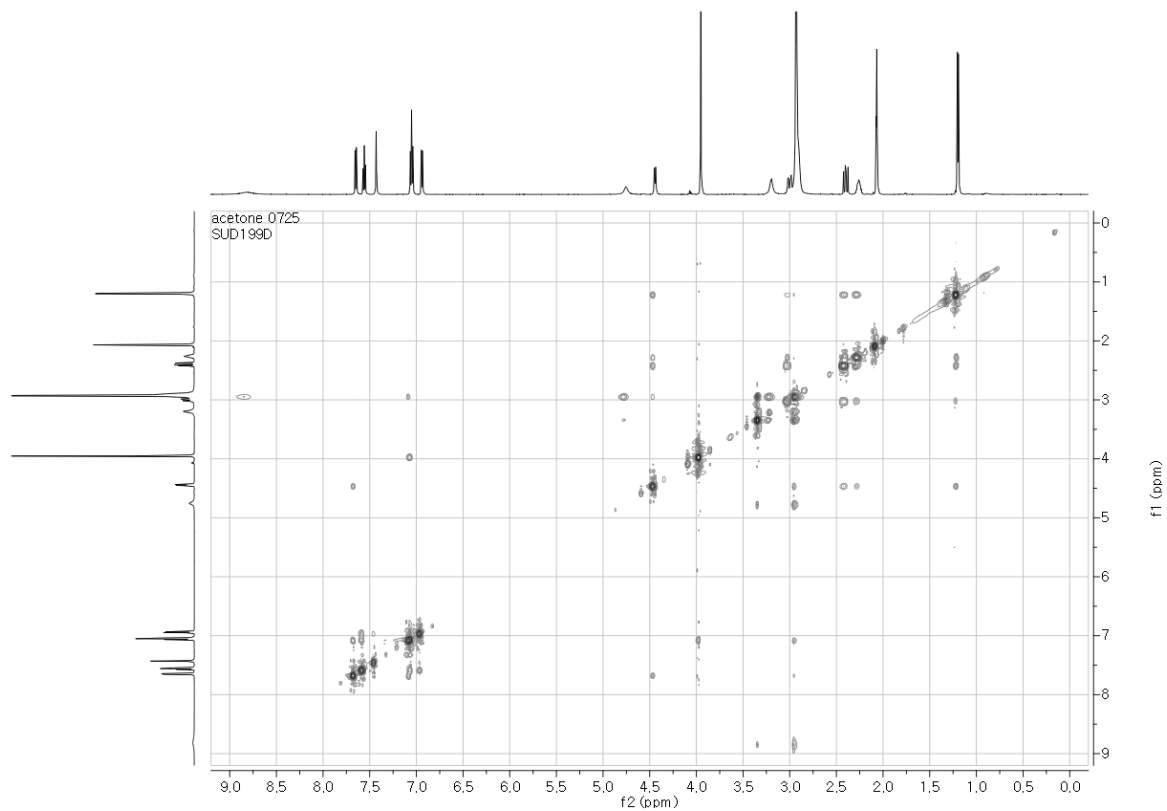



Figure S26. IR spectrum of donghaecyclinone C (**3**).

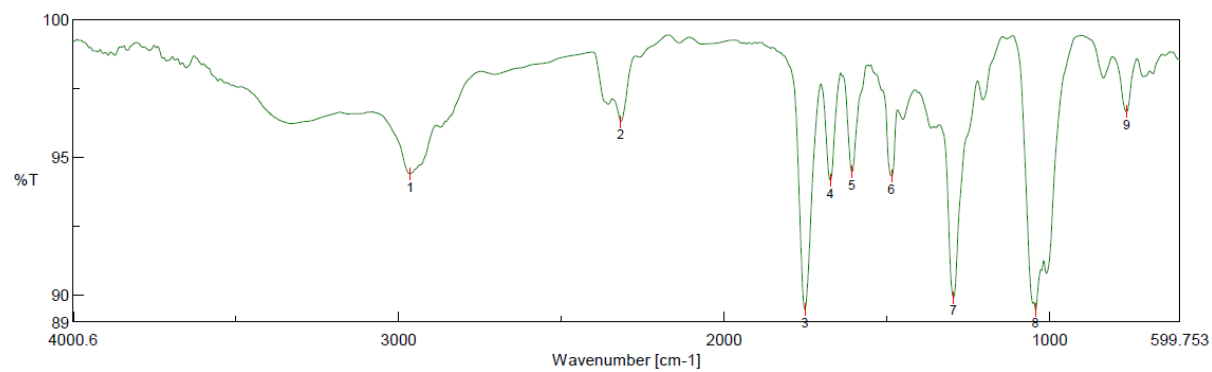

Figure S27. Key ROESY correlations of donghaecyclinone B (**2**).

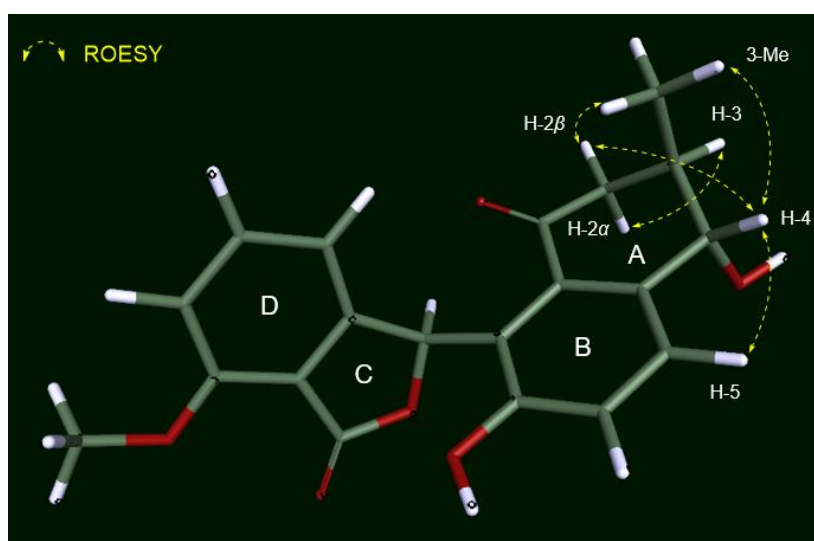

Figure S28. Key ROESY correlations of donghaecyclinone C (**3**).

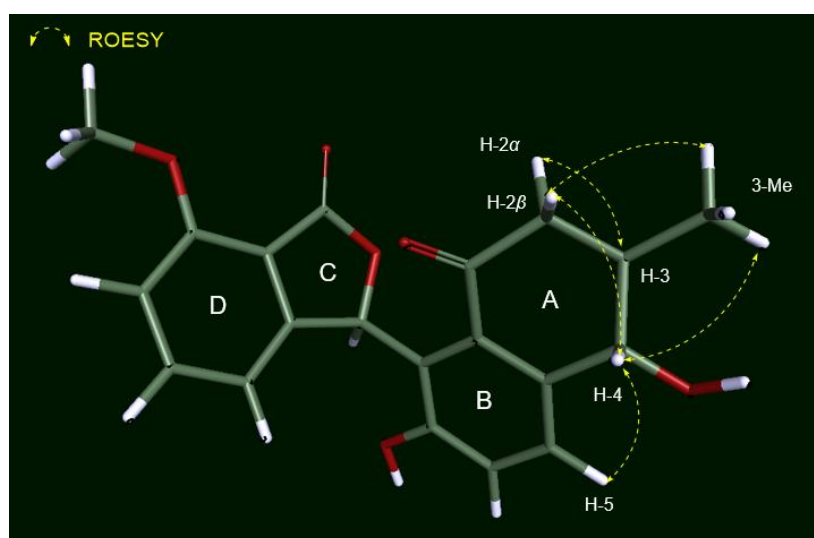

Figure S29. LC/MS chromatograms of the extract of the bacterial strain *Streptomyces* p. SUD119 and donghaecyclinones A-C (1-3).

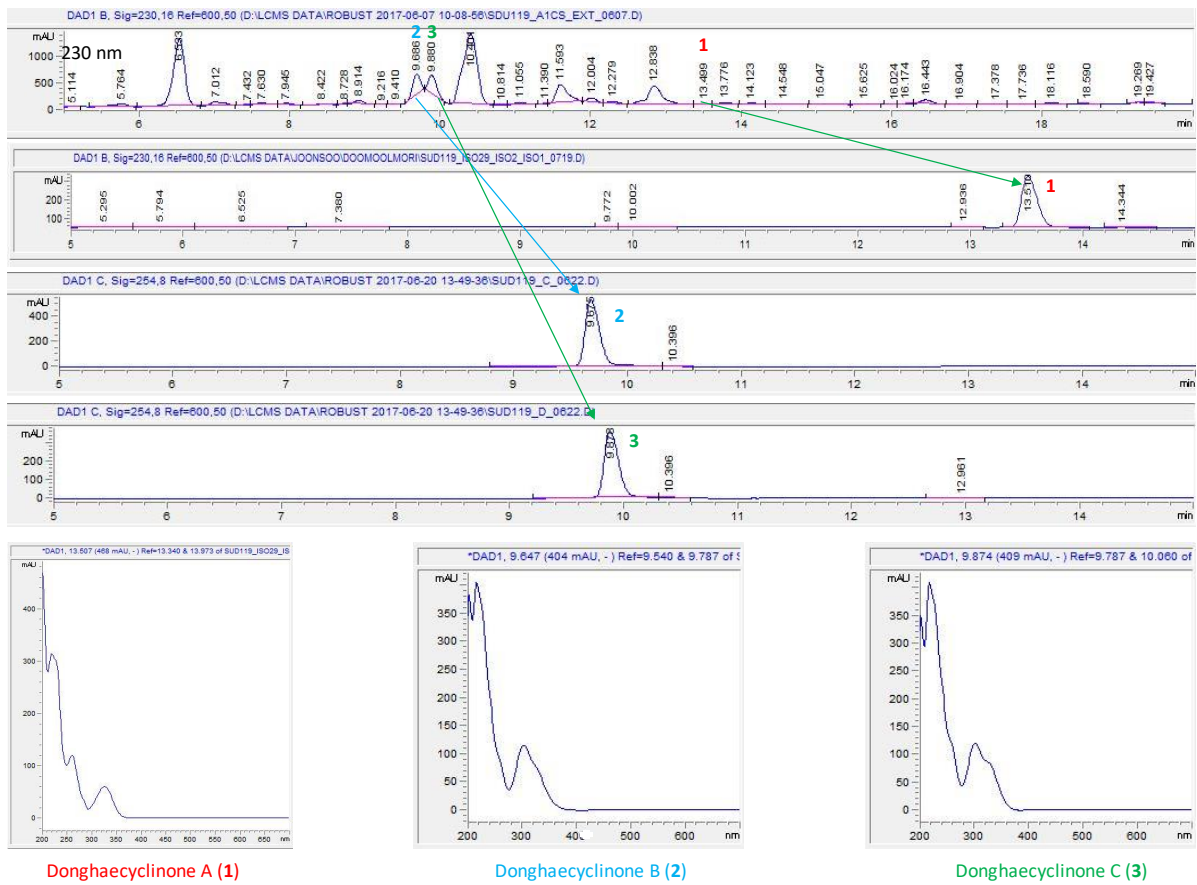

Figure S30. Cytotoxicity result of donghaecyclinones A-C (1-3) against five cancer cell lines.

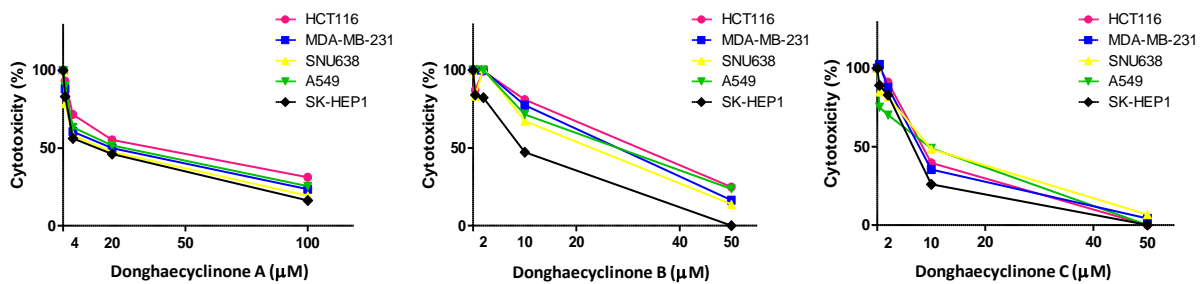

Table S1. The major conformers of diastereomers **1c–1d** on donghaecyclinone A (**1**) identified by conformational searches in MMFF94 force field using MacroModel.

| Conformers <sup>a</sup>   | Boltzmann population (%) <sup>b</sup> |
|---------------------------|---------------------------------------|
| Diastereomer <b>1c</b> _1 | 85.817                                |
| Diastereomer <b>1c</b> _2 | 14.183                                |
| Diastereomer <b>1d</b> _1 | 84.414                                |
| Diastereomer <b>1d</b> _2 | 13.385                                |
| Diastereomer <b>1d</b> _3 | 2.201                                 |

<sup>a</sup>See Computational Details regarding the procedures for conformational search processes.

<sup>b</sup>Calculated populations based on the relative MMFF94 potential energy of each conformer.

Table S2. The major conformers of diastereomers **2a/3b** identified by conformational searches in MMFF94 force field using MacroModel.

| Conformers <sup>a</sup>       | Boltzmann population (%) <sup>b</sup> |
|-------------------------------|---------------------------------------|
| Diastereomer <b>2a/3b</b> _1  | 25.811984                             |
| Diastereomer <b>2a/3b</b> _2  | 25.644898                             |
| Diastereomer <b>2a/3b</b> _3  | 12.316803                             |
| Diastereomer <b>2a/3b</b> _4  | 11.402585                             |
| Diastereomer <b>2a/3b</b> _5  | 10.142626                             |
| Diastereomer <b>2a/3b</b> _6  | 9.613082                              |
| Diastereomer <b>2a/3b</b> _7  | 1.126579                              |
| Diastereomer <b>2a/3b</b> _8  | 0.921017                              |
| Diastereomer <b>2a/3b</b> _9  | 0.761389                              |
| Diastereomer <b>2a/3b</b> _10 | 0.624365                              |
| Diastereomer <b>2a/3b</b> _11 | 0.58827                               |
| Diastereomer <b>2a/3b</b> _12 | 0.542915                              |
| Diastereomer <b>2a/3b</b> _13 | 0.503487                              |

<sup>a</sup>See Computational Details regarding the procedures for conformational search processes.

<sup>b</sup>Calculated populations based on the relative MMFF94 potential energy of each conformer.

Table S3. The major conformers of diastereomers **2b/3a** identified by conformational searches in MMFF94 force field using MacroModel.

| Conformers <sup>a</sup>       | Boltzmann population (%) <sup>b</sup> |
|-------------------------------|---------------------------------------|
| Diastereomer <b>2b/3a</b> _1  | 26.310415                             |
| Diastereomer <b>2b/3a</b> _2  | 25.447397                             |
| Diastereomer <b>2b/3a</b> _3  | 12.349908                             |
| Diastereomer <b>2b/3a</b> _4  | 11.003817                             |
| Diastereomer <b>2b/3a</b> _5  | 9.558681                              |
| Diastereomer <b>2b/3a</b> _6  | 8.84461                               |
| Diastereomer <b>2b/3a</b> _7  | 1.070525                              |
| Diastereomer <b>2b/3a</b> _8  | 0.883364                              |
| Diastereomer <b>2b/3a</b> _9  | 0.873651                              |
| Diastereomer <b>2b/3a</b> _10 | 0.831517                              |
| Diastereomer <b>2b/3a</b> _11 | 0.824524                              |
| Diastereomer <b>2b/3a</b> _12 | 0.754517                              |
| Diastereomer <b>2b/3a</b> _13 | 0.652495                              |
| Diastereomer <b>2b/3a</b> _14 | 0.59458                               |

<sup>a</sup>See Computational Details regarding the procedures for conformational search processes.

<sup>b</sup>Calculated populations based on the relative MMFF94 potential energy of each conformer.

Table S4. Experimental (Exp.) and calculated (Cal.) chemical shift values (CS,  $\delta$ ) of diastereomers **1c–1d** on donghaecyclinone A (**1**).

|      | Exp. CS of donghaecyclinone A ( <b>1</b> ) | Cal. CS of <b>1c</b> | Cal. CS of <b>1d</b> |
|------|--------------------------------------------|----------------------|----------------------|
| C-1  | 111.7                                      | 113.92               | 114.27               |
| C-2  | 148.3                                      | 151.55               | 151.81               |
| C-3  | 131.5                                      | 132.12               | 131.93               |
| C-4  | 111.5                                      | 110.41               | 110.30               |
| C-5  | 153.6                                      | 152.27               | 152.22               |
| C-6  | 122.8                                      | 126.55               | 126.38               |
| C-11 | 55.6                                       | 57.24                | 57.41                |
| C-15 | 77.3                                       | 82.22                | 82.32                |
| C-16 | 98.7                                       | 102.97               | 102.91               |
| C-17 | 125.9                                      | 130.91               | 130.86               |
| C-20 | 148.5                                      | 152.51               | 152.40               |
| C-23 | 126.3                                      | 129.09               | 129.39               |
| C-24 | 140.4                                      | 133.85               | 134.12               |
| C-25 | 127.6                                      | 132.67               | 132.59               |
| C-26 | 122.2                                      | 123.11               | 122.95               |
| C-29 | 198.9                                      | 198.54               | 200.12               |
| C-30 | 44.3                                       | 45.8                 | 47.07                |
| C-31 | 37.0                                       | 44.55                | 46.57                |
| C-34 | 71.4                                       | 79.36                | 79.23                |
| C-35 | 17.6                                       | 24.85                | 23.89                |
| H-7  | 7.10                                       | 6.89                 | 6.97                 |
| H-8  | 7.27                                       | 6.72                 | 6.74                 |
| H-9  | 6.94                                       | 5.96                 | 5.91                 |
| H-12 | 3.85                                       | 3.83                 | 3.82                 |
| H-13 | 3.85                                       | 3.37                 | 3.38                 |
| H-14 | 3.85                                       | 3.36                 | 3.37                 |
| H-19 | 6.68                                       | 6.32                 | 6.14                 |
| H-22 | 6.86                                       | 6.09                 | 6.07                 |
| H-27 | 7.00                                       | 6.46                 | 6.40                 |
| H-28 | 7.49                                       | 6.84                 | 6.85                 |
| H-32 | 2.32                                       | 2.04                 | 1.89                 |
| H-33 | 2.81                                       | 3.11                 | 3.42                 |
| H-36 | 2.08                                       | 1.71                 | 1.75                 |
| H-37 | 4.22                                       | 4.38                 | 4.31                 |
| H-40 | 1.04                                       | 1.01                 | 0.98                 |
| H-41 | 1.04                                       | 0.89                 | 0.81                 |
| H-42 | 1.04                                       | 0.83                 | 0.62                 |

**Table S5.** Experimental (Exp.) and calculated (Cal.) chemical shift values (CS,  $\delta$ ) of diastereomers **2a/3b–2b/3a** on donghaecyclinones B and C (**2** and **3**).

|      | Exp. CS of <b>2</b> | Exp. CS of <b>3</b> | Cal. CS of <b>2a/3b</b> | Cal. CS of <b>2b/3a</b> |
|------|---------------------|---------------------|-------------------------|-------------------------|
| C-1  | 201.2               | 200.4               | 196.12                  | 195.14                  |
| C-2  | 169.3               | 169.3               | 159.27                  | 159.44                  |
| C-3  | 158.9               | 158.8               | 152.17                  | 152.15                  |
| C-4  | 157.5               | 157.3               | 152.08                  | 151.91                  |
| C-5  | 153.9               | 153.8               | 141.95                  | 142.09                  |
| C-6  | 139.9               | 140.1               | 132.42                  | 132.5                   |
| C-7  | 136.2               | 136.1               | 130.36                  | 130.48                  |
| C-8  | 133.9               | 132.7               | 128.64                  | 128.7                   |
| C-9  | 130.5               | 129.4               | 127.69                  | 127.91                  |
| C-10 | 122.9               | 122.8               | 121.3                   | 121.01                  |
| C-11 | 122.0               | 121.9               | 120.49                  | 120.99                  |
| C-12 | 116.0               | 115.8               | 114.31                  | 114.71                  |
| C-13 | 115.1               | 115.0               | 112.63                  | 112.51                  |
| C-14 | 111.3               | 111.2               | 111.84                  | 111.82                  |
| C-15 | 76.4                | 76.5                | 79.96                   | 79.58                   |
| C-16 | 74.4                | 73.4                | 73.79                   | 74.08                   |
| C-17 | 56.1                | 56.0                | 56.22                   | 56.16                   |
| C-18 | 46.8                | 45.6                | 42.26                   | 40.96                   |
| C-19 | 39.6                | 38.2                | 39.05                   | 37.19                   |
| C-20 | 18.9                | 18.0                | 18.58                   | 19.18                   |
| H-1  | 7.59                | 7.63                | 7.93                    | 7.73                    |
| H-2  | 7.54                | 7.54                | 7.50                    | 7.54                    |
| H-3  | 7.43                | 7.41                | 7.44                    | 7.39                    |
| H-4  | 7.04                | 7.04                | 7.21                    | 7.19                    |
| H-5  | 7.03                | 7.05                | 6.91                    | 6.94                    |
| H-6  | 6.92                | 6.93                | 6.86                    | 6.91                    |
| H-7  | 4.55                | 4.43                | 4.72                    | 4.69                    |
| H-8  | 3.93                | 3.94                | 3.98                    | 3.96                    |
| H-9  | 3.93                | 3.94                | 3.87                    | 3.76                    |
| H-10 | 3.93                | 3.94                | 3.57                    | 3.72                    |
| H-11 | 2.81                | 2.99                | 3.48                    | 3.39                    |
| H-12 | 2.64                | 2.38                | 2.34                    | 2.33                    |
| H-13 | 2.29                | 2.24                | 2.21                    | 2.2                     |
| H-14 | 1.20                | 1.18                | 1.11                    | 1.0                     |
| H-15 | 1.20                | 1.18                | 1.1                     | 0.97                    |
| H-16 | 1.20                | 1.18                | 0.9                     | 0.85                    |

## Cartesian coordinates of the conformers shown in Table S4.

Diastereomer 1c\_1

| atomic     | coordinates | atom       | charge | isotop |   |
|------------|-------------|------------|--------|--------|---|
| 8.04904438 | 7.57134054  | 11.6482947 | c      | 6      | 0 |
| 5.76741775 | 8.81679779  | 11.2297086 | c      | 6      | 0 |
| 10.0581498 | 9.02259018  | 12.5808613 | c      | 6      | 0 |
| 9.81959807 | 11.6243324  | 13.0336871 | c      | 6      | 0 |
| 7.51722018 | 12.8687763  | 12.5444329 | c      | 6      | 0 |
| 5.50196195 | 11.407105   | 11.6609928 | c      | 6      | 0 |
| 8.24820252 | 5.5505781   | 11.2779516 | h      | 1      | 0 |
| 11.8733578 | 8.11275037  | 12.9812124 | h      | 1      | 0 |
| 11.4390155 | 12.6658527  | 13.774549  | h      | 1      | 0 |
| 7.08770348 | 15.3718552  | 12.8908063 | o      | 8      | 0 |
| 9.05876352 | 16.9268326  | 13.7852417 | c      | 6      | 0 |
| 10.6983263 | 16.9219041  | 12.4837206 | h      | 1      | 0 |
| 9.69999435 | 16.3450439  | 15.6913965 | h      | 1      | 0 |
| 8.28173427 | 18.8546684  | 13.8899826 | h      | 1      | 0 |
| 3.23361207 | 7.95783048  | 10.1659433 | c      | 6      | 0 |
| 2.82842963 | 12.0905278  | 10.89886   | c      | 6      | 0 |
| 3.25337784 | 8.37675939  | 7.31217451 | c      | 6      | 0 |
| 1.51450446 | 9.82495284  | 11.1742793 | o      | 8      | 0 |
| 2.59844869 | 6.08063764  | 10.7388919 | h      | 1      | 0 |
| 2.93422619 | 10.9257599  | 6.57118656 | c      | 6      | 0 |
| 2.73602287 | 12.8419736  | 8.2732343  | o      | 8      | 0 |
| 1.89991391 | 13.6190339  | 11.9459179 | h      | 1      | 0 |
| 3.53612444 | 6.5010769   | 5.43310961 | c      | 6      | 0 |
| 3.33504024 | 7.14974509  | 2.84497427 | c      | 6      | 0 |
| 2.97242195 | 9.68174115  | 2.17649822 | c      | 6      | 0 |
| 2.7913402  | 11.5631283  | 4.00713028 | c      | 6      | 0 |
| 2.52162989 | 13.5476687  | 3.50025972 | h      | 1      | 0 |
| 2.83701879 | 10.1899322  | 0.1758449  | h      | 1      | 0 |
| 4.10280948 | 3.82646868  | 6.15680285 | c      | 6      | 0 |
| 4.17832566 | 1.85238893  | 4.06188062 | c      | 6      | 0 |
| 2.67869355 | 2.55325058  | 1.68445633 | c      | 6      | 0 |
| 3.57795192 | 0.03342008  | 4.88561826 | h      | 1      | 0 |
| 6.19737783 | 1.65315083  | 3.55751702 | h      | 1      | 0 |
| 3.57138835 | 5.17440924  | 0.78503185 | c      | 6      | 0 |
| -0.1925866 | 2.41186066  | 2.07047637 | c      | 6      | 0 |
| 3.17759523 | 1.19002994  | 0.1748801  | h      | 1      | 0 |
| 2.38105327 | 5.78080043  | -0.8322196 | h      | 1      | 0 |
| 6.15881659 | 5.1151929   | 0.01687074 | o      | 8      | 0 |
| 4.60789386 | 3.21384234  | 8.3225251  | o      | 8      | 0 |
| -1.2153234 | 2.94251628  | 0.32733238 | h      | 1      | 0 |
| -0.8397765 | 3.6857237   | 3.59345215 | h      | 1      | 0 |
| -0.7701846 | 0.47114256  | 2.57941173 | h      | 1      | 0 |
| 6.30601616 | 3.94749441  | -1.3964544 | h      | 1      | 0 |

## Diastereomer 1c\_2

| atomic     | coordinates | atom       | charge | isotop |   |
|------------|-------------|------------|--------|--------|---|
| 8.03488077 | 7.52076917  | 11.6051695 | c      | 6      | 0 |
| 5.76546608 | 8.7860543   | 11.1801408 | c      | 6      | 0 |
| 10.0688989 | 8.96640971  | 12.4917454 | c      | 6      | 0 |
| 9.86606643 | 11.5800279  | 12.8908185 | c      | 6      | 0 |
| 7.57525976 | 12.8431917  | 12.3940024 | c      | 6      | 0 |
| 5.53460493 | 11.3879597  | 11.5588759 | c      | 6      | 0 |
| 8.20516121 | 5.49054054  | 11.274627  | h      | 1      | 0 |
| 11.8749664 | 8.04223493  | 12.9003825 | h      | 1      | 0 |
| 11.504622  | 12.6164671  | 13.5958357 | h      | 1      | 0 |
| 7.18010562 | 15.3578949  | 12.6896739 | o      | 8      | 0 |
| 9.17561695 | 16.9057967  | 13.5423328 | c      | 6      | 0 |
| 10.8074013 | 16.8544503  | 12.2320636 | h      | 1      | 0 |
| 9.82018358 | 16.3537302  | 15.4560802 | h      | 1      | 0 |
| 8.42305574 | 18.844782   | 13.6129005 | h      | 1      | 0 |
| 3.21229556 | 7.93588557  | 10.1568715 | c      | 6      | 0 |
| 2.86145154 | 12.0870567  | 10.8100114 | c      | 6      | 0 |
| 3.21647005 | 8.29792734  | 7.2956914  | c      | 6      | 0 |
| 1.52427833 | 9.84325363  | 11.1410589 | o      | 8      | 0 |
| 2.56028339 | 6.07737675  | 10.7711966 | h      | 1      | 0 |
| 2.90968268 | 10.8376175  | 6.50489198 | c      | 6      | 0 |
| 2.7509486  | 12.7881396  | 8.16936508 | o      | 8      | 0 |
| 1.96086744 | 13.6470072  | 11.8346383 | h      | 1      | 0 |
| 3.4778451  | 6.38521782  | 5.45607954 | c      | 6      | 0 |
| 3.28039928 | 6.98377713  | 2.85297817 | c      | 6      | 0 |
| 2.89805353 | 9.50102496  | 2.13653364 | c      | 6      | 0 |
| 2.7373899  | 11.4226424  | 3.93178536 | c      | 6      | 0 |
| 2.45553044 | 13.3955821  | 3.3874539  | h      | 1      | 0 |
| 2.71750042 | 9.97094306  | 0.12800718 | h      | 1      | 0 |
| 3.9926201  | 3.70878714  | 6.22506715 | c      | 6      | 0 |
| 3.95532448 | 1.6762724   | 4.18670837 | c      | 6      | 0 |
| 2.57154641 | 2.38993758  | 1.73913195 | c      | 6      | 0 |
| 3.19427563 | -0.062425   | 5.05199317 | h      | 1      | 0 |
| 5.96146301 | 1.29446026  | 3.74586958 | h      | 1      | 0 |
| 3.57108147 | 4.95854927  | 0.84367731 | c      | 6      | 0 |
| -0.3140679 | 2.35030678  | 2.01697922 | c      | 6      | 0 |
| 3.10628181 | 1.00875919  | 0.26825351 | h      | 1      | 0 |
| 2.50345298 | 5.56116324  | -0.8582213 | h      | 1      | 0 |
| 6.16613434 | 4.59091208  | 0.18961917 | o      | 8      | 0 |
| 4.53057379 | 3.14467658  | 8.39629987 | o      | 8      | 0 |
| -1.2533447 | 2.88211453  | 0.22805311 | h      | 1      | 0 |
| -0.9800693 | 3.66632523  | 3.49635283 | h      | 1      | 0 |
| -0.9698877 | 0.43629612  | 2.53201421 | h      | 1      | 0 |
| 6.95286009 | 6.2388515   | -0.001092  | h      | 1      | 0 |



Diastereomer **1d\_1**

| atomic     | coordinates | atom       | charge | isotop |   |
|------------|-------------|------------|--------|--------|---|
| 3.90080026 | 4.41707271  | 4.69247707 | c      | 6      | 0 |
| 1.8704143  | 6.09060356  | 4.79949333 | c      | 6      | 0 |
| 3.33220526 | 1.85926098  | 4.31019208 | c      | 6      | 0 |
| 0.84107515 | 1.00580465  | 3.99629528 | c      | 6      | 0 |
| -1.1881576 | 2.72916492  | 4.05245338 | c      | 6      | 0 |
| -0.6192617 | 5.27270485  | 4.48473798 | c      | 6      | 0 |
| 5.84320006 | 5.07846497  | 4.9133564  | h      | 1      | 0 |
| 4.86517973 | 0.4697935   | 4.26174243 | h      | 1      | 0 |
| 0.49985778 | -1.0091636  | 3.71324107 | h      | 1      | 0 |
| -3.6577419 | 2.11384976  | 3.74908751 | o      | 8      | 0 |
| -4.3316216 | -0.4317436  | 3.33783929 | c      | 6      | 0 |
| -6.4030433 | -0.4638993  | 3.13876688 | h      | 1      | 0 |
| -3.7822528 | -1.6483605  | 4.95080513 | h      | 1      | 0 |
| -3.4665452 | -1.1873672  | 1.5878089  | h      | 1      | 0 |
| 1.70295688 | 8.95195479  | 5.07478844 | c      | 6      | 0 |
| -2.2676919 | 7.61039743  | 4.61050319 | c      | 6      | 0 |
| 1.70817453 | 10.1158678  | 2.4363174  | c      | 6      | 0 |
| -0.830079  | 9.29741957  | 6.03339479 | o      | 8      | 0 |
| 3.04064043 | 9.81906661  | 6.38555053 | h      | 1      | 0 |
| -0.6125974 | 9.89485313  | 1.12803392 | c      | 6      | 0 |
| -2.6404759 | 8.66192343  | 2.11682119 | o      | 8      | 0 |
| -4.166934  | 7.39549993  | 5.41150712 | h      | 1      | 0 |
| 3.75681305 | 11.3531523  | 1.25544524 | c      | 6      | 0 |
| 3.45495851 | 12.4464826  | -1.167439  | c      | 6      | 0 |
| 1.1209114  | 12.2312129  | -2.3919005 | c      | 6      | 0 |
| -0.8944351 | 10.9594901  | -1.2774851 | c      | 6      | 0 |
| -2.7149891 | 10.7634004  | -2.2344382 | h      | 1      | 0 |
| 0.88237631 | 13.071621   | -4.2670642 | h      | 1      | 0 |
| 6.29943761 | 11.4069412  | 2.49786572 | c      | 6      | 0 |
| 8.26862359 | 13.1475718  | 1.34349364 | c      | 6      | 0 |
| 8.20408704 | 13.1087334  | -1.5595236 | c      | 6      | 0 |
| 10.1293503 | 12.6093876  | 2.10902488 | h      | 1      | 0 |
| 7.83459684 | 15.0891552  | 1.98797707 | h      | 1      | 0 |
| 5.55336831 | 13.9373696  | -2.4294357 | c      | 6      | 0 |
| 8.99848367 | 10.5487797  | -2.6685043 | c      | 6      | 0 |
| 9.5509109  | 14.5501318  | -2.2605456 | h      | 1      | 0 |
| 5.40227165 | 13.657072   | -4.5022602 | h      | 1      | 0 |
| 5.10871759 | 16.5377307  | -1.8478121 | o      | 8      | 0 |
| 6.80356248 | 10.102125   | 4.33139048 | o      | 8      | 0 |
| 8.9657107  | 10.5929249  | -4.7568295 | h      | 1      | 0 |
| 7.73540266 | 9.00444635  | -2.0507173 | h      | 1      | 0 |
| 10.9376889 | 10.0562702  | -2.0725868 | h      | 1      | 0 |
| 6.34298045 | 17.5456386  | -2.7662548 | h      | 1      | 0 |

Diastereomer **1d\_2**

| atomic     | coordinates | atom       | charge | isotop |   |
|------------|-------------|------------|--------|--------|---|
| 3.86411369 | 4.40824332  | 4.74398295 | c      | 6      | 0 |
| 1.86887011 | 6.1261845   | 4.78764748 | c      | 6      | 0 |
| 3.24565705 | 1.85682149  | 4.39732952 | c      | 6      | 0 |
| 0.74207281 | 1.0513395   | 4.05662823 | c      | 6      | 0 |
| -1.2500151 | 2.81819969  | 4.04796398 | c      | 6      | 0 |
| -0.6323396 | 5.35615382  | 4.44510567 | c      | 6      | 0 |
| 5.81632686 | 5.03191751  | 4.98551847 | h      | 1      | 0 |
| 4.74856545 | 0.43416156  | 4.39962072 | h      | 1      | 0 |
| 0.36201728 | -0.9606657  | 3.80368225 | h      | 1      | 0 |
| -3.7268821 | 2.25203504  | 3.71379312 | o      | 8      | 0 |
| -4.4513327 | -0.2862394  | 3.34240346 | c      | 6      | 0 |
| -6.5194686 | -0.2762194  | 3.11022513 | h      | 1      | 0 |
| -3.9550519 | -1.4811045  | 4.9883021  | h      | 1      | 0 |
| -3.575618  | -1.095927   | 1.62222888 | h      | 1      | 0 |
| 1.75845786 | 8.99425226  | 5.01610778 | c      | 6      | 0 |
| -2.2318021 | 7.72863127  | 4.50450517 | c      | 6      | 0 |
| 1.83143324 | 10.1226547  | 2.36345763 | c      | 6      | 0 |
| -0.7838686 | 9.41062259  | 5.92217968 | o      | 8      | 0 |
| 3.09209083 | 9.8529464   | 6.33655738 | h      | 1      | 0 |
| -0.4713592 | 9.92080116  | 1.01287186 | c      | 6      | 0 |
| -2.5387555 | 8.74535615  | 1.98473085 | o      | 8      | 0 |
| -4.1493019 | 7.56848609  | 5.2737924  | h      | 1      | 0 |
| 3.91868828 | 11.3145176  | 1.21139475 | c      | 6      | 0 |
| 3.67861489 | 12.394424   | -1.2278852 | c      | 6      | 0 |
| 1.37497277 | 12.1661473  | -2.5103616 | c      | 6      | 0 |
| -0.684058  | 10.9385785  | -1.4185211 | c      | 6      | 0 |
| -2.4804316 | 10.7350051  | -2.4185569 | h      | 1      | 0 |
| 1.19275286 | 12.9475904  | -4.4195198 | h      | 1      | 0 |
| 6.45635191 | 11.3045437  | 2.4758808  | c      | 6      | 0 |
| 8.48971355 | 12.9788963  | 1.33912623 | c      | 6      | 0 |
| 8.43112264 | 13.0351132  | -1.5673254 | c      | 6      | 0 |
| 10.3281577 | 12.3428123  | 2.0835123  | h      | 1      | 0 |
| 8.14995571 | 14.9202778  | 2.03797713 | h      | 1      | 0 |
| 5.80493195 | 13.9157448  | -2.4136703 | c      | 6      | 0 |
| 9.19199376 | 10.5019423  | -2.7543085 | c      | 6      | 0 |
| 9.77140315 | 14.4981146  | -2.2137563 | h      | 1      | 0 |
| 5.66170656 | 13.7479555  | -4.499065  | h      | 1      | 0 |
| 5.60828086 | 16.5195581  | -1.714771  | o      | 8      | 0 |
| 6.89307938 | 9.9897346   | 4.3198962  | o      | 8      | 0 |
| 9.16851672 | 10.6123543  | -4.8400462 | h      | 1      | 0 |
| 7.91037436 | 8.95164072  | -2.1886055 | h      | 1      | 0 |
| 11.1234699 | 9.96931438  | -2.1683264 | h      | 1      | 0 |
| 3.8429417  | 17.0145744  | -1.8162567 | h      | 1      | 0 |

Diastereomer **1d\_3**

| atomic     | coordinates | atom       | charge | isotop |   |
|------------|-------------|------------|--------|--------|---|
| 3.70278838 | 3.95469034  | 4.56487606 | c      | 6      | 0 |
| 1.8201426  | 5.77810366  | 4.81915644 | c      | 6      | 0 |
| 2.9147827  | 1.46543646  | 4.12339709 | c      | 6      | 0 |
| 0.35192362 | 0.82376011  | 3.89267811 | c      | 6      | 0 |
| -1.5272865 | 2.69910111  | 4.09644655 | c      | 6      | 0 |
| -0.7382603 | 5.17196925  | 4.58824952 | c      | 6      | 0 |
| 5.69989902 | 4.45218363  | 4.71971166 | h      | 1      | 0 |
| 4.32752133 | -0.0382577  | 3.96112526 | h      | 1      | 0 |
| -0.1622925 | -1.1460758  | 3.55895166 | h      | 1      | 0 |
| -4.048899  | 2.29319966  | 3.88139505 | o      | 8      | 0 |
| -4.9425715 | -0.1730937  | 3.41255945 | c      | 6      | 0 |
| -7.0161483 | -0.0331551  | 3.30252559 | h      | 1      | 0 |
| -4.4285544 | -1.4898803  | 4.95716126 | h      | 1      | 0 |
| -4.2131029 | -0.92821    | 1.60162809 | h      | 1      | 0 |
| 1.89483488 | 8.63227697  | 5.19525632 | c      | 6      | 0 |
| -2.1873103 | 7.62622988  | 4.86426868 | c      | 6      | 0 |
| 1.88085374 | 9.88517959  | 2.59788169 | c      | 6      | 0 |
| -0.5593171 | 9.14100646  | 6.27804203 | o      | 8      | 0 |
| 3.35290689 | 9.34249459  | 6.47183923 | h      | 1      | 0 |
| -0.5001882 | 9.89733141  | 1.39036696 | c      | 6      | 0 |
| -2.580145  | 8.79338306  | 2.42843393 | o      | 8      | 0 |
| -4.0611377 | 7.53123517  | 5.74445414 | h      | 1      | 0 |
| 3.9720371  | 10.9996914  | 1.36422198 | c      | 6      | 0 |
| 3.65278825 | 12.2147179  | -1.0008217 | c      | 6      | 0 |
| 1.25916434 | 12.2383815  | -2.1264733 | c      | 6      | 0 |
| -0.7951509 | 11.0823398  | -0.9565131 | c      | 6      | 0 |
| -2.6696121 | 11.0821506  | -1.8265247 | h      | 1      | 0 |
| 1.02240276 | 13.1902653  | -3.9404027 | h      | 1      | 0 |
| 6.54683308 | 10.8300771  | 2.50009528 | c      | 6      | 0 |
| 8.64653406 | 12.3975191  | 1.29978373 | c      | 6      | 0 |
| 7.74842396 | 14.5587417  | -0.4001389 | c      | 6      | 0 |
| 9.81768102 | 11.063334   | 0.18219847 | h      | 1      | 0 |
| 9.87448588 | 13.0684387  | 2.84719403 | h      | 1      | 0 |
| 5.87233083 | 13.458541   | -2.3328588 | c      | 6      | 0 |
| 9.96233533 | 15.9435631  | -1.6495134 | c      | 6      | 0 |
| 6.67884263 | 15.9342381  | 0.75556504 | h      | 1      | 0 |
| 6.89804068 | 11.9828939  | -3.433835  | h      | 1      | 0 |
| 4.9193703  | 15.3091114  | -4.0218168 | o      | 8      | 0 |
| 7.03664704 | 9.44777731  | 4.28118758 | o      | 8      | 0 |
| 11.0471135 | 14.6707175  | -2.9084491 | h      | 1      | 0 |
| 11.2865579 | 16.6772677  | -0.2119752 | h      | 1      | 0 |
| 9.30233416 | 17.5763208  | -2.7703687 | h      | 1      | 0 |
| 6.24477262 | 15.7499636  | -5.2088285 | h      | 1      | 0 |

## Cartesian coordinates of the conformers shown in Table S5.

Diastereomer 2a/3b\_1

| atomic coordinates |             | atom        | charge | isotop |   |
|--------------------|-------------|-------------|--------|--------|---|
| -4.29116984        | 2.04424302  | 0.26822877  | c      | 6.000  | 0 |
| -6.56263503        | 0.98774449  | -0.56319812 | c      | 6.000  | 0 |
| -1.98263994        | 0.89043330  | -0.41724914 | c      | 6.000  | 0 |
| -6.55369991        | -1.19160142 | -2.03450840 | c      | 6.000  | 0 |
| -1.93420105        | -1.26744907 | -1.99128525 | c      | 6.000  | 0 |
| -4.26443221        | -2.30879986 | -2.74996821 | c      | 6.000  | 0 |
| -4.28595906        | 4.44411131  | 1.87327920  | c      | 6.000  | 0 |
| -2.14062876        | 6.19386673  | 0.98656185  | c      | 6.000  | 0 |
| 0.37729314         | 4.79395486  | 1.33159342  | c      | 6.000  | 0 |
| -2.14736999        | 8.74647466  | 2.34194529  | c      | 6.000  | 0 |
| -2.46056360        | 6.52698513  | -1.04964755 | h      | 1.000  | 0 |
| 0.35958389         | 1.96976438  | 0.76154472  | c      | 6.000  | 0 |
| 2.14421953         | 0.65819649  | 1.35541595  | o      | 8.000  | 0 |
| 0.43483734         | -2.45496828 | -3.11563779 | c      | 6.000  | 0 |
| -4.20567380        | -4.43060192 | -4.21221396 | o      | 8.000  | 0 |
| -8.33554769        | -2.02202664 | -2.68113676 | h      | 1.000  | 0 |
| -8.34134682        | 1.90842755  | -0.07658661 | h      | 1.000  | 0 |
| -5.89973849        | -4.86657850 | -4.73547862 | h      | 1.000  | 0 |
| -1.87928774        | 8.50337931  | 4.39670340  | h      | 1.000  | 0 |
| -3.94725426        | 9.73756061  | 2.03981479  | h      | 1.000  | 0 |
| -0.60131047        | 9.95608552  | 1.64660222  | h      | 1.000  | 0 |
| 2.28984529         | -0.61994214 | -3.81205176 | o      | 8.000  | 0 |
| -0.17684873        | -3.39516072 | -4.87251050 | h      | 1.000  | 0 |
| 1.86849879         | -4.37969757 | -1.55365532 | c      | 6.000  | 0 |
| 4.41272179         | -3.72473991 | -1.62878884 | c      | 6.000  | 0 |
| 4.68570879         | -1.32332351 | -3.04938370 | c      | 6.000  | 0 |
| 6.50642687         | -0.08624730 | -3.57275529 | o      | 8.000  | 0 |
| 1.01583550         | -6.53540830 | -0.30510909 | c      | 6.000  | 0 |
| 2.83444402         | -8.01793142 | 0.91063822  | c      | 6.000  | 0 |
| 6.24975045         | -5.21656014 | -0.40864554 | c      | 6.000  | 0 |
| 5.40958242         | -7.39125770 | 0.87116312  | c      | 6.000  | 0 |
| -0.98269738        | -7.04584676 | -0.27338353 | h      | 1.000  | 0 |
| 2.24868025         | -9.72031134 | 1.92626492  | h      | 1.000  | 0 |
| 8.67349357         | -4.46498275 | -0.54877181 | o      | 8.000  | 0 |
| 6.75094008         | -8.61040935 | 1.84963576  | h      | 1.000  | 0 |
| 10.56991878        | -5.87983569 | 0.67976219  | c      | 6.000  | 0 |
| 12.36115613        | -4.89898399 | 0.31085335  | h      | 1.000  | 0 |
| 10.69452608        | -7.82544625 | -0.06942572 | h      | 1.000  | 0 |
| 10.25630856        | -5.96745774 | 2.74247665  | h      | 1.000  | 0 |
| 1.06689655         | 4.98458946  | 3.29269162  | h      | 1.000  | 0 |
| 1.87034569         | 5.62105153  | 0.13175772  | h      | 1.000  | 0 |
| -3.88726774        | 3.93038390  | 3.86872004  | h      | 1.000  | 0 |
| -6.63375660        | 5.72997243  | 1.73296556  | o      | 8.000  | 0 |
| -7.63830440        | 5.29443517  | 3.18867823  | h      | 1.000  | 0 |

Diastereomer **2a/3b**\_2

| atomic coordinates |             | atom        | charge | isotop |   |
|--------------------|-------------|-------------|--------|--------|---|
| -2.26578163        | -0.94599690 | -3.87639522 | o      | 8.000  | 0 |
| -2.40070808        | -2.81342427 | -2.50728863 | c      | 6.000  | 0 |
| -0.60225572        | -3.19552689 | -0.33202488 | c      | 6.000  | 0 |
| -1.01138143        | -5.32846078 | 1.24022726  | c      | 6.000  | 0 |
| -3.06948216        | -7.23935185 | 0.73340271  | c      | 6.000  | 0 |
| -2.03202251        | -9.23584751 | -0.75229997 | o      | 8.000  | 0 |
| -5.32524825        | -6.12535829 | -0.67652196 | c      | 6.000  | 0 |
| -6.92055505        | -4.38114107 | 0.99456286  | c      | 6.000  | 0 |
| -4.39361326        | -4.79026678 | -3.04907312 | c      | 6.000  | 0 |
| 0.56616195         | -5.75610580 | 3.32535108  | c      | 6.000  | 0 |
| 2.52958740         | -4.10939845 | 3.85088392  | c      | 6.000  | 0 |
| 2.96063393         | -2.03580196 | 2.29204883  | c      | 6.000  | 0 |
| 5.00267199         | -0.61264921 | 2.98671215  | o      | 8.000  | 0 |
| 1.42296378         | -1.48570269 | 0.18481522  | c      | 6.000  | 0 |
| 1.86629353         | 0.88836026  | -1.38781487 | c      | 6.000  | 0 |
| 4.51455573         | 1.63971537  | -1.33357973 | o      | 8.000  | 0 |
| 4.81332144         | 4.16892482  | -0.85717977 | c      | 6.000  | 0 |
| 6.83324970         | 5.25306071  | -0.87853368 | o      | 8.000  | 0 |
| 1.53389070         | 0.55368976  | -3.39470403 | h      | 1.000  | 0 |
| 0.57428777         | 3.21518004  | -0.47526612 | c      | 6.000  | 0 |
| 2.31510349         | 5.15536187  | -0.22657816 | c      | 6.000  | 0 |
| 1.65199859         | 7.57912461  | 0.54480804  | c      | 6.000  | 0 |
| 3.53548862         | 9.32371977  | 0.73207990  | o      | 8.000  | 0 |
| 2.86765941         | 11.80077279 | 1.52538694  | c      | 6.000  | 0 |
| -0.90026553        | 8.01735210  | 1.06580554  | c      | 6.000  | 0 |
| -2.68926926        | 6.07206801  | 0.80615717  | c      | 6.000  | 0 |
| -1.95870114        | 3.66002158  | 0.02626719  | c      | 6.000  | 0 |
| -3.72616199        | -8.07404388 | 2.51333576  | h      | 1.000  | 0 |
| -6.55432612        | -7.68211468 | -1.28936014 | h      | 1.000  | 0 |
| -0.29857673        | -9.52346382 | -0.21032652 | h      | 1.000  | 0 |
| -7.62296625        | -5.40707339 | 2.64920707  | h      | 1.000  | 0 |
| -5.85815102        | -2.74104776 | 1.67127379  | h      | 1.000  | 0 |
| -8.56348295        | -3.67948576 | -0.05083363 | h      | 1.000  | 0 |
| -5.98948698        | -3.86165535 | -3.99015673 | h      | 1.000  | 0 |
| -3.58443253        | -6.14028713 | -4.39644785 | h      | 1.000  | 0 |
| 0.27608899         | -7.38145925 | 4.55272820  | h      | 1.000  | 0 |
| 3.75772042         | -4.44539176 | 5.46508798  | h      | 1.000  | 0 |
| 5.72171279         | 0.16365028  | 1.47455330  | h      | 1.000  | 0 |
| 1.56544913         | 12.68743229 | 0.18387035  | h      | 1.000  | 0 |
| 2.07416340         | 11.78300936 | 3.43627800  | h      | 1.000  | 0 |
| 4.59430218         | 12.93763203 | 1.57130728  | h      | 1.000  | 0 |
| -1.57508673        | 9.85681151  | 1.67448633  | h      | 1.000  | 0 |
| -4.67008019        | 6.45624934  | 1.20413349  | h      | 1.000  | 0 |
| -3.37164937        | 2.19038156  | -0.19955508 | h      | 1.000  | 0 |

Diastereomer **2a/3b**\_3

| atomic coordinates |              | atom        | charge | isotop |   |
|--------------------|--------------|-------------|--------|--------|---|
| -2.26653753        | -1.00627917  | -3.85390748 | o      | 8.000  | 0 |
| -2.22987684        | -2.89354866  | -2.50709966 | c      | 6.000  | 0 |
| -0.45296735        | -3.12126066  | -0.29895467 | c      | 6.000  | 0 |
| -0.79368498        | -5.21715591  | 1.33584740  | c      | 6.000  | 0 |
| -2.76221269        | -7.23330472  | 0.88892717  | c      | 6.000  | 0 |
| -1.50970221        | -9.24813073  | -0.38607105 | o      | 8.000  | 0 |
| -4.99038877        | -6.33303919  | -0.70883627 | c      | 6.000  | 0 |
| -6.77958148        | -4.61074279  | 0.77894511  | c      | 6.000  | 0 |
| -3.99866050        | -5.05917481  | -3.09102504 | c      | 6.000  | 0 |
| 0.78801580         | -5.50798476  | 3.44251410  | c      | 6.000  | 0 |
| 2.66545871         | -3.75450788  | 3.94310255  | c      | 6.000  | 0 |
| 3.01619188         | -1.71209188  | 2.32663082  | c      | 6.000  | 0 |
| 4.97810555         | -0.16383926  | 2.98671215  | o      | 8.000  | 0 |
| 1.48475782         | -1.30504487  | 0.18368138  | c      | 6.000  | 0 |
| 1.84550654         | 1.02914485   | -1.46415981 | c      | 6.000  | 0 |
| 4.47468251         | 1.86024641   | -1.45244351 | o      | 8.000  | 0 |
| 4.70258348         | 4.39833758   | -0.99664156 | c      | 6.000  | 0 |
| 6.68604003         | 5.54899182   | -0.98794882 | o      | 8.000  | 0 |
| 1.50535584         | 0.62984572   | -3.45800985 | h      | 1.000  | 0 |
| 0.49076188         | 3.34046889   | -0.60206675 | c      | 6.000  | 0 |
| 2.18395649         | 5.32090188   | -0.38285851 | c      | 6.000  | 0 |
| 1.43090063         | 7.71858639   | 0.35167803  | c      | 6.000  | 0 |
| 3.05776586         | 9.71054671   | 0.49888770  | o      | 8.000  | 0 |
| 4.24583668         | 9.78651370   | 2.92113866  | c      | 6.000  | 0 |
| -1.13100109        | 8.14131813   | 0.80615717  | c      | 6.000  | 0 |
| -2.86709249        | 6.15275932   | 0.58222462  | c      | 6.000  | 0 |
| -2.06017943        | 3.73731138   | -0.12528884 | c      | 6.000  | 0 |
| -3.45385245        | -7.96255004  | 2.70230837  | h      | 1.000  | 0 |
| -6.08964247        | -7.98881723  | -1.30731254 | h      | 1.000  | 0 |
| -2.65034090        | -10.68866896 | -0.40213372 | h      | 1.000  | 0 |
| -7.53641679        | -5.60643949  | 2.42829808  | h      | 1.000  | 0 |
| -5.84737958        | -2.89203688  | 1.45301042  | h      | 1.000  | 0 |
| -8.38320308        | -4.03947858  | -0.39835427 | h      | 1.000  | 0 |
| -5.58999888        | -4.32237059  | -4.19538099 | h      | 1.000  | 0 |
| -2.98142092        | -6.40088036  | -4.29780415 | h      | 1.000  | 0 |
| 0.57750031         | -7.12823595  | 4.69162307  | h      | 1.000  | 0 |
| 3.89453659         | -3.99469207  | 5.57242442  | h      | 1.000  | 0 |
| 5.74986971         | 0.46808516   | 1.43316830  | h      | 1.000  | 0 |
| 2.85254160         | 10.15066393  | 4.40873107  | h      | 1.000  | 0 |
| 5.28235146         | 8.04248545   | 3.32818567  | h      | 1.000  | 0 |
| 5.59906956         | 11.34950619  | 2.91376873  | h      | 1.000  | 0 |
| -1.78484633        | 10.01951693  | 1.32072959  | h      | 1.000  | 0 |
| -4.86264329        | 6.50103585   | 0.93352471  | h      | 1.000  | 0 |
| -3.43249855        | 2.22590841   | -0.33259180 | h      | 1.000  | 0 |

Diastereomer **2a/3b**\_4

| atomic coordinates |             |             | atom | charge | isotop |  |
|--------------------|-------------|-------------|------|--------|--------|--|
| -2.23025478        | -1.05484513 | -3.98051913 | o    | 8.000  | 0      |  |
| -2.36933863        | -2.86558071 | -2.53790220 | c    | 6.000  | 0      |  |
| -0.58675996        | -3.14866168 | -0.33467050 | c    | 6.000  | 0      |  |
| -0.97717738        | -5.23605317 | 1.30221028  | c    | 6.000  | 0      |  |
| -3.00579839        | -7.18965205 | 0.84187299  | c    | 6.000  | 0      |  |
| -1.93337881        | -9.21203696 | -0.58184668 | o    | 8.000  | 0      |  |
| -5.26987927        | -6.14614528 | -0.60830284 | c    | 6.000  | 0      |  |
| -6.89145327        | -4.37055860 | 1.00363355  | c    | 6.000  | 0      |  |
| -4.34693703        | -4.87379267 | -3.01808161 | c    | 6.000  | 0      |  |
| 0.58978353         | -5.57412518 | 3.41152259  | c    | 6.000  | 0      |  |
| 2.52505206         | -3.88300926 | 3.89944988  | c    | 6.000  | 0      |  |
| 2.93682338         | -1.85363236 | 2.27900972  | c    | 6.000  | 0      |  |
| 4.95164939         | -0.37624447 | 2.93984695  | o    | 8.000  | 0      |  |
| 1.40709008         | -1.39216124 | 0.14437508  | c    | 6.000  | 0      |  |
| 1.82075113         | 0.94618588  | -1.48986008 | c    | 6.000  | 0      |  |
| 4.45710806         | 1.75177613  | -1.42787707 | o    | 8.000  | 0      |  |
| 4.70352835         | 4.28457606  | -0.95223300 | c    | 6.000  | 0      |  |
| 6.69983504         | 5.41104181  | -0.89497430 | o    | 8.000  | 0      |  |
| 1.51669420         | 0.55633537  | -3.49089109 | h    | 1.000  | 0      |  |
| 0.47394331         | 3.26865929  | -0.64420764 | c    | 6.000  | 0      |  |
| 2.18357855         | 5.23038399  | -0.38361441 | c    | 6.000  | 0      |  |
| 1.44280590         | 7.63392666  | 0.34506399  | c    | 6.000  | 0      |  |
| 3.08913531         | 9.60642280  | 0.52874537  | o    | 8.000  | 0      |  |
| 4.22240407         | 9.67067349  | 2.97745250  | c    | 6.000  | 0      |  |
| -1.12211938        | 8.08349251  | 0.75078819  | c    | 6.000  | 0      |  |
| -2.87540729        | 6.11534274  | 0.48395886  | c    | 6.000  | 0      |  |
| -2.08153334        | 3.69365870  | -0.21788542 | c    | 6.000  | 0      |  |
| -3.65945466        | -7.98239216 | 2.64202611  | h    | 1.000  | 0      |  |
| -6.47835913        | -7.73559393 | -1.17616555 | h    | 1.000  | 0      |  |
| -0.20409042        | -9.47036252 | -0.01285014 | h    | 1.000  | 0      |  |
| -7.58422687        | -5.35227133 | 2.68889132  | h    | 1.000  | 0      |  |
| -5.85191492        | -2.69588330 | 1.62951085  | h    | 1.000  | 0      |  |
| -8.54080623        | -3.72389432 | -0.06689631 | h    | 1.000  | 0      |  |
| -5.94942479        | -3.98637728 | -3.98751112 | h    | 1.000  | 0      |  |
| -3.52622897        | -6.25745015 | -4.32369339 | h    | 1.000  | 0      |  |
| 0.31293865         | -7.16414075 | 4.68765465  | h    | 1.000  | 0      |  |
| 3.74505925         | -4.15059448 | 5.53236223  | h    | 1.000  | 0      |  |
| 5.69884710         | 0.30972611  | 1.39707453  | h    | 1.000  | 0      |  |
| 5.22849427         | 7.91455099  | 3.40831006  | h    | 1.000  | 0      |  |
| 5.59415627         | 11.21741433 | 2.99994024  | h    | 1.000  | 0      |  |
| 2.80019619         | 10.05239817 | 4.43273059  | h    | 1.000  | 0      |  |
| -1.76576010        | 9.96698255  | 1.25874658  | h    | 1.000  | 0      |  |
| -4.87379267        | 6.48535112  | 0.79500778  | h    | 1.000  | 0      |  |
| -3.46915924        | 2.20209786  | -0.46147112 | h    | 1.000  | 0      |  |

## Diastereomer 2a/3b\_5

| atomic coordinates |             | atom        | charge | isotop |   |
|--------------------|-------------|-------------|--------|--------|---|
| -2.22269588        | -0.83280231 | -3.84370296 | o      | 8.000  | 0 |
| -2.38011007        | -2.71988282 | -2.50350918 | c      | 6.000  | 0 |
| -0.58033490        | -3.15886621 | -0.33939481 | c      | 6.000  | 0 |
| -0.97698841        | -5.34168886 | 1.16577205  | c      | 6.000  | 0 |
| -3.03376634        | -7.23859596 | 0.60641312  | c      | 6.000  | 0 |
| -2.00367662        | -9.17310860 | -0.96319341 | o      | 8.000  | 0 |
| -5.30370537        | -6.07546952 | -0.73944984 | c      | 6.000  | 0 |
| -6.87860313        | -4.38718819 | 1.00684608  | c      | 6.000  | 0 |
| -4.39814860        | -4.66271026 | -3.07647415 | c      | 6.000  | 0 |
| 0.60924771         | -5.83056101 | 3.23010888  | c      | 6.000  | 0 |
| 2.56870473         | -4.19443613 | 3.80137309  | c      | 6.000  | 0 |
| 2.98520037         | -2.06830525 | 2.31075712  | c      | 6.000  | 0 |
| 5.02364795         | -0.66064826 | 3.04604956  | o      | 8.000  | 0 |
| 1.43713672         | -1.45565604 | 0.22865686  | c      | 6.000  | 0 |
| 1.85665593         | 0.97453177  | -1.26177014 | c      | 6.000  | 0 |
| 4.49490258         | 1.76953955  | -1.16388233 | o      | 8.000  | 0 |
| 4.74302362         | 4.28627682  | -0.61094846 | c      | 6.000  | 0 |
| 6.72648017         | 5.43598620  | -0.61794045 | o      | 8.000  | 0 |
| 1.54655187         | 0.69938764  | -3.28132046 | h      | 1.000  | 0 |
| 0.51967469         | 3.25146279  | -0.28629351 | c      | 6.000  | 0 |
| 2.23044376         | 5.20373885  | 0.03269226  | c      | 6.000  | 0 |
| 1.49893077         | 7.57213262  | 0.87645498  | c      | 6.000  | 0 |
| 3.17530682         | 9.47792142  | 1.31695014  | o      | 8.000  | 0 |
| 3.63413233         | 10.87990924 | -0.94278437 | c      | 6.000  | 0 |
| -1.04123910        | 7.96273901  | 1.45962447  | c      | 6.000  | 0 |
| -2.79887338        | 6.01008500  | 1.11871787  | c      | 6.000  | 0 |
| -2.02427463        | 3.64395890  | 0.23054659  | c      | 6.000  | 0 |
| -3.67306069        | -8.14188505 | 2.35894513  | h      | 1.000  | 0 |
| -6.54147599        | -7.60992714 | -1.38989357 | h      | 1.000  | 0 |
| -0.27533310        | -9.49738560 | -0.42481043 | h      | 1.000  | 0 |
| -7.55871556        | -5.46565490 | 2.63711282  | h      | 1.000  | 0 |
| -5.80882916        | -2.76788187 | 1.72116256  | h      | 1.000  | 0 |
| -8.53513706        | -3.65435240 | 0.00548021  | h      | 1.000  | 0 |
| -6.00139226        | -3.69006822 | -3.95935420 | h      | 1.000  | 0 |
| -3.62128219        | -5.97153458 | -4.48224142 | h      | 1.000  | 0 |
| 0.32900132         | -7.49522076 | 4.40627443  | h      | 1.000  | 0 |
| 3.80364076         | -4.57786156 | 5.39970346  | h      | 1.000  | 0 |
| 5.72209073         | 0.18727186  | 1.56355940  | h      | 1.000  | 0 |
| 1.91051312         | 11.83781142 | -1.57357495 | h      | 1.000  | 0 |
| 5.05067104         | 12.32403795 | -0.51551729 | h      | 1.000  | 0 |
| 4.37698367         | 9.68068904  | -2.45664397 | h      | 1.000  | 0 |
| -1.65955749        | 9.78311220  | 2.18357855  | h      | 1.000  | 0 |
| -4.78119609        | 6.33984221  | 1.55354385  | h      | 1.000  | 0 |
| -3.41397923        | 2.16052389  | -0.04629829 | h      | 1.000  | 0 |



Diastereomer **2a/3b**\_6

| atomic coordinates |              | atom        | charge | isotop |   |
|--------------------|--------------|-------------|--------|--------|---|
| -2.24650643        | -0.79368498  | -3.71728028 | o      | 8.000  | 0 |
| -2.23951444        | -2.74955152  | -2.47062795 | c      | 6.000  | 0 |
| -0.44144002        | -3.13505566  | -0.30046646 | c      | 6.000  | 0 |
| -0.78896066        | -5.32562619  | 1.20356657  | c      | 6.000  | 0 |
| -2.79169242        | -7.28243760  | 0.65951442  | c      | 6.000  | 0 |
| -1.59133838        | -9.22280840  | -0.77138621 | o      | 8.000  | 0 |
| -5.03404145        | -6.24611179  | -0.83223539 | c      | 6.000  | 0 |
| -6.76503059        | -4.59430218  | 0.79727546  | c      | 6.000  | 0 |
| -4.06593475        | -4.83921068  | -3.14809477 | c      | 6.000  | 0 |
| 0.81636169         | -5.76914491  | 3.26469087  | c      | 6.000  | 0 |
| 2.72233947         | -4.07349365  | 3.84899419  | c      | 6.000  | 0 |
| 3.07817490         | -1.93489059  | 2.36291356  | c      | 6.000  | 0 |
| 5.06692268         | -0.45825859  | 3.09990675  | o      | 8.000  | 0 |
| 1.52444207         | -1.37458679  | 0.27155365  | c      | 6.000  | 0 |
| 1.89123791         | 1.05238848   | -1.23266836 | c      | 6.000  | 0 |
| 4.52154772         | 1.87763189   | -1.18277959 | o      | 8.000  | 0 |
| 4.74793691         | 4.40079422   | -0.65119963 | c      | 6.000  | 0 |
| 6.71551976         | 5.57695977   | -0.70335607 | o      | 8.000  | 0 |
| 1.54655187         | 0.76666189   | -3.24560464 | h      | 1.000  | 0 |
| 0.54443010         | 3.31722526   | -0.24320775 | c      | 6.000  | 0 |
| 2.23630191         | 5.29236701   | 0.03231432  | c      | 6.000  | 0 |
| 1.48967111         | 7.65603646   | 0.87626601  | c      | 6.000  | 0 |
| 3.14714990         | 9.58752554   | 1.27310850  | o      | 8.000  | 0 |
| 3.55381897         | 10.97326171  | -1.00665711 | c      | 6.000  | 0 |
| -1.04426266        | 8.01640723   | 1.50648967  | c      | 6.000  | 0 |
| -2.78205481        | 6.03861986   | 1.21207034  | c      | 6.000  | 0 |
| -1.99366107        | 3.67797397   | 0.32219831  | c      | 6.000  | 0 |
| -3.46197828        | -8.12298779  | 2.43245548  | h      | 1.000  | 0 |
| -6.17241247        | -7.84274140  | -1.51253680 | h      | 1.000  | 0 |
| -2.74709488        | -10.64936266 | -0.84962087 | h      | 1.000  | 0 |
| -7.50466940        | -5.67976087  | 2.39692863  | h      | 1.000  | 0 |
| -5.79238855        | -2.93474469  | 1.55675639  | h      | 1.000  | 0 |
| -8.38263616        | -3.92703988  | -0.30840331 | h      | 1.000  | 0 |
| -5.66502100        | -4.00225098  | -4.16684613 | h      | 1.000  | 0 |
| -3.10293031        | -6.12025603  | -4.46088751 | h      | 1.000  | 0 |
| 0.60112188         | -7.46196159  | 4.41269950  | h      | 1.000  | 0 |
| 3.96918077         | -4.43084087  | 5.44335613  | h      | 1.000  | 0 |
| 5.78350683         | 0.34052865   | 1.59908625  | h      | 1.000  | 0 |
| 1.80827894         | 11.90262903  | -1.62025119 | h      | 1.000  | 0 |
| 4.95750754         | 12.43968919  | -0.61453894 | h      | 1.000  | 0 |
| 4.28930038         | 9.76969514   | -2.52051672 | h      | 1.000  | 0 |
| -1.67202968        | 9.83262302   | 2.23233348  | h      | 1.000  | 0 |
| -4.75946424        | 6.34381063   | 1.68544674  | h      | 1.000  | 0 |
| -3.36579122        | 2.17129533   | 0.08295898  | h      | 1.000  | 0 |

Diastereomer **2a/3b**\_7

| atomic coordinates |              |             | atom | charge | isotop |  |
|--------------------|--------------|-------------|------|--------|--------|--|
| -2.91735921        | -0.34128454  | -3.26998210 | o    | 8.000  | 0      |  |
| -2.68265522        | -2.42999884  | -2.28713554 | c    | 6.000  | 0      |  |
| -0.71034805        | -2.91169003  | -0.30235618 | c    | 6.000  | 0      |  |
| -0.97207512        | -5.13778741  | 1.16860664  | c    | 6.000  | 0      |  |
| -3.05984456        | -7.03885190  | 0.67141970  | c    | 6.000  | 0      |  |
| -2.26275807        | -9.48812595  | 1.45735679  | o    | 8.000  | 0      |  |
| -3.69876096        | -7.11330711  | -2.14824067 | c    | 6.000  | 0      |  |
| -5.75421608        | -9.05292202  | -2.76788187 | c    | 6.000  | 0      |  |
| -4.53420889        | -4.49320183  | -2.97745250 | c    | 6.000  | 0      |  |
| 0.69390744         | -5.55371613  | 3.18815696  | c    | 6.000  | 0      |  |
| 2.64164816         | -3.87318268  | 3.68175343  | c    | 6.000  | 0      |  |
| 2.96365750         | -1.75631147  | 2.16071286  | c    | 6.000  | 0      |  |
| 5.01098679         | -0.30367899  | 2.77185029  | o    | 8.000  | 0      |  |
| 1.30958021         | -1.18088986  | 0.15571343  | c    | 6.000  | 0      |  |
| 1.64406174         | 1.23096760   | -1.37779932 | c    | 6.000  | 0      |  |
| 4.30895353         | 1.86497072   | -1.64519557 | o    | 8.000  | 0      |  |
| 4.77307027         | 4.36980271   | -1.16879561 | c    | 6.000  | 0      |  |
| 6.81359655         | 5.37797160   | -1.44620741 | o    | 8.000  | 0      |  |
| 1.03103458         | 0.99059444   | -3.33290998 | h    | 1.000  | 0      |  |
| 0.58846072         | 3.57214931   | -0.23319220 | c    | 6.000  | 0      |  |
| 2.42659733         | 5.43579722   | -0.18065782 | c    | 6.000  | 0      |  |
| 1.97608662         | 7.85710332   | 0.73680422  | c    | 6.000  | 0      |  |
| 3.93686645         | 9.52478663   | 0.70278915  | o    | 8.000  | 0      |  |
| 3.49523746         | 11.98880054  | 1.67448633  | c    | 6.000  | 0      |  |
| -0.46014831        | 8.37280958   | 1.61911735  | c    | 6.000  | 0      |  |
| -2.34552808        | 6.50273660   | 1.56563810  | c    | 6.000  | 0      |  |
| -1.82925490        | 4.09050119   | 0.63116853  | c    | 6.000  | 0      |  |
| -4.70900855        | -6.50254763  | 1.80865688  | h    | 1.000  | 0      |  |
| -2.00103100        | -7.65830413  | -3.21499107 | h    | 1.000  | 0      |  |
| -3.76112192        | -10.53616806 | 1.63083365  | h    | 1.000  | 0      |  |
| -5.11076433        | -10.97911987 | -2.37557472 | h    | 1.000  | 0      |  |
| -7.46914254        | -8.70861392  | -1.66144722 | h    | 1.000  | 0      |  |
| -6.25933987        | -8.96882920  | -4.77344821 | h    | 1.000  | 0      |  |
| -6.35684974        | -3.99866050  | -2.12235142 | h    | 1.000  | 0      |  |
| -4.76362164        | -4.46731258  | -5.03687604 | h    | 1.000  | 0      |  |
| 0.50436791         | -7.22347815  | 4.37547189  | h    | 1.000  | 0      |  |
| 3.94555920         | -4.23374243  | 5.22868324  | h    | 1.000  | 0      |  |
| 5.71339799         | 0.38172468   | 1.20904678  | h    | 1.000  | 0      |  |
| 2.05753381         | 12.98033984  | 0.56465017  | h    | 1.000  | 0      |  |
| 2.97745250         | 11.91944759  | 3.67665117  | h    | 1.000  | 0      |  |
| 5.25891886         | 13.05668478  | 1.51707214  | h    | 1.000  | 0      |  |
| -0.96848464        | 10.21604845  | 2.36272459  | h    | 1.000  | 0      |  |
| -4.23355346        | 6.94549943   | 2.25009691  | h    | 1.000  | 0      |  |
| -3.31250094        | 2.67396248   | 0.57258702  | h    | 1.000  | 0      |  |

Diastereomer **2a/3b**\_8

| atomic coordinates |              | atom        | charge | isotop |   |
|--------------------|--------------|-------------|--------|--------|---|
| -2.80397564        | -0.43520393  | -3.45063992 | o      | 8.000  | 0 |
| -2.82910900        | -2.38407849  | -2.19491690 | c      | 6.000  | 0 |
| -0.84319580        | -2.91905996  | -0.22903481 | c      | 6.000  | 0 |
| -1.16407130        | -5.11511070  | 1.27858870  | c      | 6.000  | 0 |
| -3.30418615        | -6.97535711  | 0.85812464  | c      | 6.000  | 0 |
| -2.48517884        | -9.49171643  | 1.38063391  | o      | 8.000  | 0 |
| -4.26681264        | -6.89750039  | -1.86534867 | c      | 6.000  | 0 |
| -6.50783886        | -8.68310261  | -2.26313602 | c      | 6.000  | 0 |
| -5.00645145        | -4.20293989  | -2.51125706 | c      | 6.000  | 0 |
| 0.49284058         | -5.55484997  | 3.30210745  | c      | 6.000  | 0 |
| 2.50993425         | -3.94744892  | 3.74543720  | c      | 6.000  | 0 |
| 2.90375318         | -1.87441935  | 2.18036601  | c      | 6.000  | 0 |
| 5.01457727         | -0.50172229  | 2.75918913  | o      | 8.000  | 0 |
| 1.25137665         | -1.26252603  | 0.18179165  | c      | 6.000  | 0 |
| 1.65653393         | 1.12533191   | -1.37817727 | c      | 6.000  | 0 |
| 4.33370894         | 1.73420167   | -1.57867721 | o      | 8.000  | 0 |
| 4.80973096         | 4.23903366   | -1.11456047 | c      | 6.000  | 0 |
| 6.86877655         | 5.22131331   | -1.33981583 | o      | 8.000  | 0 |
| 1.10643465         | 0.85869156   | -3.34746087 | h      | 1.000  | 0 |
| 0.58997250         | 3.49315876   | -0.29876570 | c      | 6.000  | 0 |
| 2.44511664         | 5.33904325   | -0.21164933 | c      | 6.000  | 0 |
| 1.99290518         | 7.77735688   | 0.65932545  | c      | 6.000  | 0 |
| 3.97239331         | 9.42293039   | 0.66669538  | o      | 8.000  | 0 |
| 3.52622897         | 11.90659745  | 1.58510228  | c      | 6.000  | 0 |
| -0.46392777        | 8.33085766   | 1.45660090  | c      | 6.000  | 0 |
| -2.36744890        | 6.48119372   | 1.36513816  | c      | 6.000  | 0 |
| -1.84871908        | 4.05119489   | 0.47866763  | c      | 6.000  | 0 |
| -4.83202972        | -6.52635818  | 2.18509033  | h      | 1.000  | 0 |
| -2.74974050        | -7.51751953  | -3.14261456 | h      | 1.000  | 0 |
| -0.85831361        | -9.73775877  | 0.55879202  | h      | 1.000  | 0 |
| -5.97172356        | -10.64879574 | -1.90503292 | h      | 1.000  | 0 |
| -8.07952409        | -8.20745854  | -1.00306663 | h      | 1.000  | 0 |
| -7.19569917        | -8.57009699  | -4.21201058 | h      | 1.000  | 0 |
| -6.57246749        | -3.53794527  | -1.32866644 | h      | 1.000  | 0 |
| -5.61815580        | -4.11657941  | -4.48980032 | h      | 1.000  | 0 |
| 0.22412152         | -7.17396732  | 4.54554724  | h      | 1.000  | 0 |
| 3.80534152         | -4.32048086  | 5.29728030  | h      | 1.000  | 0 |
| 5.68920950         | 0.21883029   | 1.19997610  | h      | 1.000  | 0 |
| 2.94343743         | 11.87447211  | 3.57025958  | h      | 1.000  | 0 |
| 5.30559509         | 12.95369470  | 1.46831721  | h      | 1.000  | 0 |
| 2.13595745         | 12.89530217  | 0.41403900  | h      | 1.000  | 0 |
| -0.97528766        | 10.18940331  | 2.15920108  | h      | 1.000  | 0 |
| -4.27172593        | 6.95457012   | 1.98099991  | h      | 1.000  | 0 |
| -3.34878368        | 2.65487625   | 0.38852769  | h      | 1.000  | 0 |

## Diastereomer 2a/3b\_9

| atomic coordinates |              | atom        | charge | isotop |   |
|--------------------|--------------|-------------|--------|--------|---|
| -3.30172950        | -0.81239326  | -3.18286573 | o      | 8.000  | 0 |
| -2.67585221        | -2.88126544  | -2.34458321 | c      | 6.000  | 0 |
| -0.71507237        | -3.12749675  | -0.32144242 | c      | 6.000  | 0 |
| -0.75815812        | -5.35680667  | 1.15707931  | c      | 6.000  | 0 |
| -2.47421843        | -7.56608549  | 0.58090181  | c      | 6.000  | 0 |
| -0.96149266        | -9.35830176  | -0.74833155 | o      | 8.000  | 0 |
| -4.77628280        | -6.89598861  | -1.03764862 | c      | 6.000  | 0 |
| -6.85838306        | -5.62571470  | 0.52345414  | c      | 6.000  | 0 |
| -3.94877173        | -5.26156447  | -3.26280114 | c      | 6.000  | 0 |
| 0.91746204         | -5.59226655  | 3.19855045  | c      | 6.000  | 0 |
| 2.56284658         | -3.64188021  | 3.80893200  | c      | 6.000  | 0 |
| 2.61386919         | -1.46793926  | 2.32606390  | c      | 6.000  | 0 |
| 4.21692387         | 0.44011722   | 3.00863298  | o      | 8.000  | 0 |
| 1.05276643         | -1.17295301  | 0.18953953  | c      | 6.000  | 0 |
| 1.32923336         | 1.13345774   | -1.50705659 | c      | 6.000  | 0 |
| 3.97296022         | 1.64765222   | -2.04014833 | o      | 8.000  | 0 |
| 4.64381300         | 4.06310016   | -1.40349960 | c      | 6.000  | 0 |
| 6.73762956         | 4.96279877   | -1.68979311 | o      | 8.000  | 0 |
| 0.53422558         | 0.83166847   | -3.38468848 | h      | 1.000  | 0 |
| 0.41744050         | 3.55778739   | -0.42783400 | c      | 6.000  | 0 |
| 2.38218876         | 5.28594194   | -0.37889009 | c      | 6.000  | 0 |
| 2.07907669         | 7.73672776   | 0.51797393  | c      | 6.000  | 0 |
| 4.13944510         | 9.28101196   | 0.48736037  | o      | 8.000  | 0 |
| 3.82480570         | 11.79793820  | 1.36551610  | c      | 6.000  | 0 |
| -0.32956824        | 8.41324972   | 1.37723241  | c      | 6.000  | 0 |
| -2.33834712        | 6.67300092   | 1.31430453  | c      | 6.000  | 0 |
| -1.97400792        | 4.22750633   | 0.40137783  | c      | 6.000  | 0 |
| -3.09385963        | -8.45387883  | 2.34911856  | h      | 1.000  | 0 |
| -5.57658182        | -8.64455220  | -1.81810551 | h      | 1.000  | 0 |
| -1.93507956        | -10.91033383 | -0.89081690 | h      | 1.000  | 0 |
| -7.51449597        | -6.89579964  | 2.02030621  | h      | 1.000  | 0 |
| -6.21719898        | -3.87601727  | 1.42107405  | h      | 1.000  | 0 |
| -8.48694904        | -5.16915687  | -0.66952997 | h      | 1.000  | 0 |
| -5.59472319        | -4.73565369  | -4.40608545 | h      | 1.000  | 0 |
| -2.63276645        | -6.26595391  | -4.50737477 | h      | 1.000  | 0 |
| 0.93749314         | -7.31097247  | 4.32879565  | h      | 1.000  | 0 |
| 3.80042823         | -3.84823830  | 5.43352955  | h      | 1.000  | 0 |
| 5.46452106         | -0.19029542  | 4.19916044  | h      | 1.000  | 0 |
| 3.28434402         | 11.82855176  | 3.36257868  | h      | 1.000  | 0 |
| 5.64650169         | 12.76113161  | 1.19241719  | h      | 1.000  | 0 |
| 2.45569911         | 12.82783894  | 0.20503529  | h      | 1.000  | 0 |
| -0.72225333        | 10.29031469  | 2.10572183  | h      | 1.000  | 0 |
| -4.19897147        | 7.24483205   | 1.97646456  | h      | 1.000  | 0 |
| -3.53303198        | 2.89392660   | 0.32956824  | h      | 1.000  | 0 |

Diastereomer **2a/3b**\_10

| atomic coordinates |              | atom        | charge | isotop |   |
|--------------------|--------------|-------------|--------|--------|---|
| -3.29303676        | -0.86795121  | -3.26317909 | o      | 8.000  | 0 |
| -2.64807323        | -2.90620982  | -2.36631506 | c      | 6.000  | 0 |
| -0.70373401        | -3.07307264  | -0.31917474 | c      | 6.000  | 0 |
| -0.72546586        | -5.26836749  | 1.20980267  | c      | 6.000  | 0 |
| -2.40203089        | -7.51714159  | 0.67047483  | c      | 6.000  | 0 |
| -0.84962087        | -9.31521600  | -0.60395647 | o      | 8.000  | 0 |
| -4.70012684        | -6.92017710  | -0.98190170 | c      | 6.000  | 0 |
| -6.81435244        | -5.64555683  | 0.53157996  | c      | 6.000  | 0 |
| -3.87847392        | -5.32600414  | -3.23804573 | c      | 6.000  | 0 |
| 0.93522546         | -5.43107291  | 3.26998210  | c      | 6.000  | 0 |
| 2.54565008         | -3.44232513  | 3.84880522  | c      | 6.000  | 0 |
| 2.57701953         | -1.30126542  | 2.31737116  | c      | 6.000  | 0 |
| 4.14946064         | 0.64307380   | 2.97235024  | o      | 8.000  | 0 |
| 1.02876691         | -1.07884465  | 0.16232747  | c      | 6.000  | 0 |
| 1.27858870         | 1.19392897   | -1.58264564 | c      | 6.000  | 0 |
| 3.92080378         | 1.74969743   | -2.09740704 | o      | 8.000  | 0 |
| 4.53647656         | 4.18555441   | -1.49250570 | c      | 6.000  | 0 |
| 6.61744298         | 5.12814981   | -1.73098914 | o      | 8.000  | 0 |
| 0.51268270         | 0.83733765   | -3.46292314 | h      | 1.000  | 0 |
| 0.30897022         | 3.62222705   | -0.56219352 | c      | 6.000  | 0 |
| 2.24575054         | 5.37721571   | -0.51684010 | c      | 6.000  | 0 |
| 1.86081332         | 7.82044263   | 0.33958379  | c      | 6.000  | 0 |
| 3.70121761         | 9.62399725   | 0.33315872  | o      | 8.000  | 0 |
| 5.24039954         | 9.41423765   | 2.53941398  | c      | 6.000  | 0 |
| -0.57126421        | 8.51453904   | 1.09434040  | c      | 6.000  | 0 |
| -2.54621699        | 6.74556641   | 1.03972732  | c      | 6.000  | 0 |
| -2.11195793        | 4.27758408   | 0.20730296  | c      | 6.000  | 0 |
| -3.02337284        | -8.37375444  | 2.45324247  | h      | 1.000  | 0 |
| -5.46754462        | -8.69859837  | -1.72758763 | h      | 1.000  | 0 |
| -1.80090901        | -10.88236589 | -0.72754456 | h      | 1.000  | 0 |
| -7.46385131        | -6.88994148  | 2.05299847  | h      | 1.000  | 0 |
| -6.20718343        | -3.86562378  | 1.39272816  | h      | 1.000  | 0 |
| -8.43951691        | -5.24228927  | -0.68483675 | h      | 1.000  | 0 |
| -5.52253565        | -4.85168288  | -4.40627443 | h      | 1.000  | 0 |
| -2.53752425        | -6.33946426  | -4.44822635 | h      | 1.000  | 0 |
| 0.97113026         | -7.12313369  | 4.43972258  | h      | 1.000  | 0 |
| 3.77113747         | -3.59407013  | 5.48870956  | h      | 1.000  | 0 |
| 5.40669544         | 0.03817247   | 4.16684613  | h      | 1.000  | 0 |
| 4.13226414         | 9.81202501   | 4.24262414  | h      | 1.000  | 0 |
| 6.13329514         | 7.55436919   | 2.69304871  | h      | 1.000  | 0 |
| 6.73762956         | 10.83342198  | 2.40373164  | h      | 1.000  | 0 |
| -0.93919389        | 10.43884716  | 1.71171393  | h      | 1.000  | 0 |
| -4.43405340        | 7.30927171   | 1.62535345  | h      | 1.000  | 0 |
| -3.64943911        | 2.91849304   | 0.13114699  | h      | 1.000  | 0 |

## Diastereomer 2a/3b\_11

| atomic coordinates |              | atom        | charge | isotop |   |
|--------------------|--------------|-------------|--------|--------|---|
| -3.29020217        | -0.69730894  | -3.12485114 | o      | 8.000  | 0 |
| -2.66923816        | -2.78734605  | -2.33626842 | c      | 6.000  | 0 |
| -0.69919867        | -3.08800148  | -0.32843440 | c      | 6.000  | 0 |
| -0.72981223        | -5.35983023  | 1.08413588  | c      | 6.000  | 0 |
| -2.44511664        | -7.55455817  | 0.45315633  | c      | 6.000  | 0 |
| -0.93994978        | -9.30028717  | -0.94448512 | o      | 8.000  | 0 |
| -4.76173191        | -6.83835196  | -1.12400910 | c      | 6.000  | 0 |
| -6.82984819        | -5.61437634  | 0.49151777  | c      | 6.000  | 0 |
| -3.95406296        | -5.14005508  | -3.30815457 | c      | 6.000  | 0 |
| 0.95620142         | -5.65198189  | 3.10954435  | c      | 6.000  | 0 |
| 2.60026316         | -3.71671336  | 3.77000364  | c      | 6.000  | 0 |
| 2.63862460         | -1.49911974  | 2.35308698  | c      | 6.000  | 0 |
| 4.23978955         | 0.39287406   | 3.08271024  | o      | 8.000  | 0 |
| 1.06637246         | -1.14479609  | 0.23319220  | c      | 6.000  | 0 |
| 1.32072959         | 1.21811747   | -1.38687001 | c      | 6.000  | 0 |
| 3.96124392         | 1.77728743   | -1.90805648 | o      | 8.000  | 0 |
| 4.60639642         | 4.17459400   | -1.19033849 | c      | 6.000  | 0 |
| 6.67356784         | 5.13570871   | -1.47228563 | o      | 8.000  | 0 |
| 0.52723359         | 0.97226410   | -3.27300566 | h      | 1.000  | 0 |
| 0.38852769         | 3.59709370   | -0.22431049 | c      | 6.000  | 0 |
| 2.34004787         | 5.33356304   | -0.12283220 | c      | 6.000  | 0 |
| 1.99063751         | 7.73181448   | 0.86587251  | c      | 6.000  | 0 |
| 3.89642632         | 9.45184320   | 1.09131684  | o      | 8.000  | 0 |
| 4.20142811         | 10.83474479  | -1.20564527 | c      | 6.000  | 0 |
| -0.39003947        | 8.36014842   | 1.81678271  | c      | 6.000  | 0 |
| -2.38445644        | 6.61649811   | 1.69073797  | c      | 6.000  | 0 |
| -2.00424354        | 4.21786873   | 0.65365627  | c      | 6.000  | 0 |
| -3.04869517        | -8.49904329  | 2.19737355  | h      | 1.000  | 0 |
| -5.56864497        | -8.56386089  | -1.94792970 | h      | 1.000  | 0 |
| -1.90975723        | -10.85061849 | -1.12382013 | h      | 1.000  | 0 |
| -7.47122124        | -6.92660217  | 1.95813422  | h      | 1.000  | 0 |
| -6.18148316        | -3.89000125  | 1.43203446  | h      | 1.000  | 0 |
| -8.46975253        | -5.12588214  | -0.67293148 | h      | 1.000  | 0 |
| -5.61078586        | -4.58050718  | -4.41912456 | h      | 1.000  | 0 |
| -2.65128577        | -6.10910665  | -4.59430218 | h      | 1.000  | 0 |
| 0.98587012         | -7.40338007  | 4.18801106  | h      | 1.000  | 0 |
| 3.84729344         | -3.97031461  | 5.38061722  | h      | 1.000  | 0 |
| 5.43485236         | -0.24037316  | 4.32444928  | h      | 1.000  | 0 |
| 5.81185272         | 12.10936507  | -0.96772875 | h      | 1.000  | 0 |
| 4.59827060         | 9.59395061   | -2.81285735 | h      | 1.000  | 0 |
| 2.52448514         | 11.98539903  | -1.59322810 | h      | 1.000  | 0 |
| -0.69976559        | 10.20867852  | 2.65714392  | h      | 1.000  | 0 |
| -4.23714394        | 7.13522794   | 2.41412514  | h      | 1.000  | 0 |
| -3.55192924        | 2.87276167   | 0.54461907  | h      | 1.000  | 0 |

Diastereomer **2a/3b**\_12

| atomic coordinates |              | atom        | charge | isotop |   |  |
|--------------------|--------------|-------------|--------|--------|---|--|
| -2.89789503        | -0.42254276  | -3.40660930 | o      | 8.000  | 0 |  |
| -2.65960056        | -2.46949411  | -2.34061479 | c      | 6.000  | 0 |  |
| -0.70430093        | -2.86010050  | -0.31898577 | c      | 6.000  | 0 |  |
| -0.94542998        | -5.04708056  | 1.21320418  | c      | 6.000  | 0 |  |
| -2.99634976        | -6.99708896  | 0.75248895  | c      | 6.000  | 0 |  |
| -2.15882314        | -9.41083615  | 1.60399954  | o      | 8.000  | 0 |  |
| -3.62128219        | -7.15563698  | -2.06660450 | c      | 6.000  | 0 |  |
| -5.64612374        | -9.14022736  | -2.64240405 | c      | 6.000  | 0 |  |
| -4.49055621        | -4.57068060  | -2.96762592 | c      | 6.000  | 0 |  |
| 0.70486785         | -5.37702674  | 3.26204525  | c      | 6.000  | 0 |  |
| 2.61972734         | -3.65170678  | 3.72805172  | c      | 6.000  | 0 |  |
| 2.92283941         | -1.57470879  | 2.15013040  | c      | 6.000  | 0 |  |
| 4.94031103         | -0.06973089  | 2.73575652  | o      | 8.000  | 0 |  |
| 1.28104535         | -1.08300205  | 0.11224973  | c      | 6.000  | 0 |  |
| 1.58888173         | 1.29729699   | -1.47663200 | c      | 6.000  | 0 |  |
| 4.24848229         | 1.97854326   | -1.72210743 | o      | 8.000  | 0 |  |
| 4.66724561         | 4.48658779   | -1.23191247 | c      | 6.000  | 0 |  |
| 6.70134682         | 5.52896072   | -1.41540487 | o      | 8.000  | 0 |  |
| 1.00949170         | 1.00306663   | -3.43419930 | h      | 1.000  | 0 |  |
| 0.47243153         | 3.64112431   | -0.39344098 | c      | 6.000  | 0 |  |
| 2.28826938         | 5.52083490   | -0.31237173 | c      | 6.000  | 0 |  |
| 1.75801222         | 7.92645627   | 0.57409880  | c      | 6.000  | 0 |  |
| 3.50109561         | 9.82298542   | 0.59280709  | o      | 8.000  | 0 |  |
| 4.94824788         | 9.75627808   | 2.87030502  | c      | 6.000  | 0 |  |
| -0.70826935        | 8.46483924   | 1.33357973  | c      | 6.000  | 0 |  |
| -2.56643706        | 6.57756975   | 1.25477815  | c      | 6.000  | 0 |  |
| -1.98099991        | 4.15021654   | 0.38814975  | c      | 6.000  | 0 |  |
| -4.66063156        | -6.46248543  | 1.86856120  | h      | 1.000  | 0 |  |
| -1.91108004        | -7.70403550  | -3.11143408 | h      | 1.000  | 0 |  |
| -3.63847870        | -10.48249984 | 1.79335010  | h      | 1.000  | 0 |  |
| -4.97734966        | -11.04582720 | -2.19548382 | h      | 1.000  | 0 |  |
| -7.37106576        | -8.79062803  | -1.55297694 | h      | 1.000  | 0 |  |
| -6.14312172        | -9.11736168  | -4.65174985 | h      | 1.000  | 0 |  |
| -6.31716549        | -4.07235982  | -2.12386320 | h      | 1.000  | 0 |  |
| -4.72337047        | -4.60620745  | -5.02667152 | h      | 1.000  | 0 |  |
| 0.52855640         | -7.01541930  | 4.49452464  | h      | 1.000  | 0 |  |
| 3.91211104         | -3.94725995  | 5.29822516  | h      | 1.000  | 0 |  |
| 5.67957190         | 0.51967469   | 1.15008733  | h      | 1.000  | 0 |  |
| 6.37895954         | 11.24424844  | 2.75503173  | h      | 1.000  | 0 |  |
| 3.74846076         | 10.14480578  | 4.51209909  | h      | 1.000  | 0 |  |
| 5.92259068         | 7.94667634   | 3.11237894  | h      | 1.000  | 0 |  |
| -1.19392897        | 10.35437641  | 1.97646456  | h      | 1.000  | 0 |  |
| -4.48602087        | 7.01523033   | 1.84720730  | h      | 1.000  | 0 |  |
| -3.44704944        | 2.71685926   | 0.29971056  | h      | 1.000  | 0 |  |

Diastereomer **2a/3b**\_13

| atomic coordinates |             | atom        | charge | isotop |   |
|--------------------|-------------|-------------|--------|--------|---|
| -3.40056218        | -0.78877169 | -3.20516450 | o      | 8.000  | 0 |
| -2.85669900        | -2.87276167 | -2.34647294 | c      | 6.000  | 0 |
| -0.87229758        | -3.16944867 | -0.34638680 | c      | 6.000  | 0 |
| -0.92842245        | -5.40801825 | 1.11947376  | c      | 6.000  | 0 |
| -2.64693940        | -7.60576974 | 0.49775386  | c      | 6.000  | 0 |
| -1.25326637        | -9.38910430 | -0.97453177 | o      | 8.000  | 0 |
| -5.00588453        | -6.86537504 | -0.99928718 | c      | 6.000  | 0 |
| -6.99841176        | -5.59018785 | 0.67009689  | c      | 6.000  | 0 |
| -4.24375798        | -5.20468372 | -3.22859710 | c      | 6.000  | 0 |
| 0.72376511         | -5.66709970 | 3.17719655  | c      | 6.000  | 0 |
| 2.38559027         | -3.73579959 | 3.79967234  | c      | 6.000  | 0 |
| 2.47421843         | -1.56355940 | 2.31548143  | c      | 6.000  | 0 |
| 4.09862701         | 0.32333214  | 3.00485353  | o      | 8.000  | 0 |
| 0.92483197         | -1.24457363 | 0.17196508  | c      | 6.000  | 0 |
| 1.24627439         | 1.05956944  | -1.52236337 | c      | 6.000  | 0 |
| 3.90228447         | 1.51348166  | -2.05054183 | o      | 8.000  | 0 |
| 4.62586060         | 3.91381180  | -1.41257029 | c      | 6.000  | 0 |
| 6.74103106         | 4.76362164  | -1.69224975 | o      | 8.000  | 0 |
| 0.45051071         | 0.77611052  | -3.40226293 | h      | 1.000  | 0 |
| 0.38739386         | 3.50241842  | -0.44314078 | c      | 6.000  | 0 |
| 2.39012561         | 5.18692029  | -0.39174023 | c      | 6.000  | 0 |
| 2.14030382         | 7.64356427  | 0.50474585  | c      | 6.000  | 0 |
| 4.23487627         | 9.14136120  | 0.47810071  | o      | 8.000  | 0 |
| 3.97125947         | 11.66943682 | 1.34151658  | c      | 6.000  | 0 |
| -0.25379022        | 8.37318753  | 1.36116973  | c      | 6.000  | 0 |
| -2.30074157        | 6.67791421  | 1.29521829  | c      | 6.000  | 0 |
| -1.98950367        | 4.22486072  | 0.38248057  | c      | 6.000  | 0 |
| -3.21820361        | -8.57028596 | 2.24083725  | h      | 1.000  | 0 |
| -5.86608786        | -8.58710453 | -1.77709846 | h      | 1.000  | 0 |
| 0.53025715         | -9.24189463 | -0.55520154 | h      | 1.000  | 0 |
| -7.59991159        | -6.86953244 | 2.18206677  | h      | 1.000  | 0 |
| -6.29770131        | -3.85693104 | 1.55486666  | h      | 1.000  | 0 |
| -8.67459885        | -5.10244953 | -0.44162900 | h      | 1.000  | 0 |
| -5.93147239        | -4.61376636 | -4.27531641 | h      | 1.000  | 0 |
| -3.02091620        | -6.21908871 | -4.55726354 | h      | 1.000  | 0 |
| 0.69976559         | -7.37371137 | 4.32747285  | h      | 1.000  | 0 |
| 3.60351876         | -3.95009454 | 5.43900976  | h      | 1.000  | 0 |
| 5.28216249         | -0.28780529 | 4.26832442  | h      | 1.000  | 0 |
| 5.81298656         | 12.59313496 | 1.16690589  | h      | 1.000  | 0 |
| 2.62615241         | 12.72125839 | 0.17272097  | h      | 1.000  | 0 |
| 3.42758526         | 11.72216018 | 3.33725635  | h      | 1.000  | 0 |
| -0.60603517        | 10.25856729 | 2.08947019  | h      | 1.000  | 0 |
| -4.14927167        | 7.29131932  | 1.95416580  | h      | 1.000  | 0 |
| -3.57876335        | 2.92737475  | 0.30726947  | h      | 1.000  | 0 |



Diastereomer **2b/3a\_1**

| atomic coordinates |              | atom         | charge | isotop |   |
|--------------------|--------------|--------------|--------|--------|---|
| -1.04955389        | -2.59043658  | -1.86175819  | o      | 8.000  | 0 |
| -0.34959933        | -1.23474706  | -3.61126664  | c      | 6.000  | 0 |
| -0.24377467        | -2.22458560  | -6.27634741  | c      | 6.000  | 0 |
| 1.05767972         | -0.73623730  | -8.08273662  | c      | 6.000  | 0 |
| 2.25255355         | 1.75839017   | -7.39789987  | c      | 6.000  | 0 |
| 4.75700760         | 1.29370651   | -6.52390153  | o      | 8.000  | 0 |
| 0.77573258         | 3.13751230   | -5.33809838  | c      | 6.000  | 0 |
| -1.79278318        | 4.09711523   | -6.26595391  | c      | 6.000  | 0 |
| 0.51740702         | 1.43297933   | -3.03206558  | c      | 6.000  | 0 |
| 1.31109199         | -1.59568475  | -10.57396258 | c      | 6.000  | 0 |
| 0.23791652         | -3.87167090  | -11.29243646 | c      | 6.000  | 0 |
| -1.10360006        | -5.30483920  | -9.54179417  | c      | 6.000  | 0 |
| -2.13765820        | -7.46252850  | -10.51764874 | o      | 8.000  | 0 |
| -1.37061836        | -4.56727909  | -6.99482128  | c      | 6.000  | 0 |
| -2.72460714        | -6.26028474  | -5.10018186  | c      | 6.000  | 0 |
| -4.72696095        | -7.70309064  | -6.31905522  | o      | 8.000  | 0 |
| -4.67915088        | -10.20716674 | -5.65254881  | c      | 6.000  | 0 |
| -6.25896193        | -11.73992361 | -6.29373289  | o      | 8.000  | 0 |
| -3.74789384        | -5.16424358  | -3.68383213  | h      | 1.000  | 0 |
| -1.16123671        | -8.28626012  | -3.93384289  | c      | 6.000  | 0 |
| -2.35989000        | -10.59758416 | -4.20879805  | c      | 6.000  | 0 |
| -1.37269706        | -12.83917730 | -3.25524224  | c      | 6.000  | 0 |
| -2.71856002        | -14.99648865 | -3.65737596  | o      | 8.000  | 0 |
| -1.71076907        | -17.29231693 | -2.69569433  | c      | 6.000  | 0 |
| 0.92615478         | -12.68478667 | -1.96285854  | c      | 6.000  | 0 |
| 2.15561060         | -10.35040798 | -1.65842366  | c      | 6.000  | 0 |
| 1.11134794         | -8.13545998  | -2.63956946  | c      | 6.000  | 0 |
| 2.39258226         | 2.97877530   | -9.06709496  | h      | 1.000  | 0 |
| 1.87063990         | 4.80009335   | -4.74869280  | h      | 1.000  | 0 |
| 5.50892963         | 0.00850377   | -7.60369105  | h      | 1.000  | 0 |
| -2.73046529        | 5.19901454   | -4.78554246  | h      | 1.000  | 0 |
| -1.55694536        | 5.33167331   | -7.91001565  | h      | 1.000  | 0 |
| -3.06683654        | 2.55868919   | -6.80169127  | h      | 1.000  | 0 |
| -0.82165292        | 2.26691547   | -1.68865927  | h      | 1.000  | 0 |
| 2.34533910         | 1.27084083   | -2.06773834  | h      | 1.000  | 0 |
| 2.33003232         | -0.48811626  | -11.97613937 | h      | 1.000  | 0 |
| 0.41214927         | -4.53118532  | -13.23186239 | h      | 1.000  | 0 |
| -3.70216247        | -7.82346619  | -9.60774561  | h      | 1.000  | 0 |
| -3.02016031        | -18.81430236 | -3.19023566  | h      | 1.000  | 0 |
| 0.11640713         | -17.72619805 | -3.56459041  | h      | 1.000  | 0 |
| -1.56223659        | -17.23468029 | -0.63268031  | h      | 1.000  | 0 |
| 1.82320777         | -14.34491108 | -1.15726828  | h      | 1.000  | 0 |
| 3.93648851         | -10.26688209 | -0.63286928  | h      | 1.000  | 0 |
| 2.06717142         | -6.34135399  | -2.35818924  | h      | 1.000  | 0 |

Diastereomer **2b/3a\_2**

| atomic coordinates |              | atom         | charge | isotop |   |  |
|--------------------|--------------|--------------|--------|--------|---|--|
| -0.99683054        | -2.64410481  | -1.92090662  | o      | 8.000  | 0 |  |
| -0.24698721        | -1.33830405  | -3.68761158  | c      | 6.000  | 0 |  |
| -0.20786987        | -2.33891404  | -6.35004673  | c      | 6.000  | 0 |  |
| 1.09131684         | -0.88269108  | -8.18289211  | c      | 6.000  | 0 |  |
| 2.33324486         | 1.60097598   | -7.55115666  | c      | 6.000  | 0 |  |
| 4.85187185         | 1.04218396   | -6.78903011  | o      | 8.000  | 0 |  |
| 0.95865807         | 2.99937332   | -5.43428544  | c      | 6.000  | 0 |  |
| -1.62044016        | 4.01434523   | -6.26954439  | c      | 6.000  | 0 |  |
| 0.74757566         | 1.28803733   | -3.12938648  | c      | 6.000  | 0 |  |
| 1.29805288         | -1.77294106  | -10.66825992 | c      | 6.000  | 0 |  |
| 0.16194953         | -4.02681742  | -11.36160043 | c      | 6.000  | 0 |  |
| -1.18996055        | -5.41727791  | -9.58639170  | c      | 6.000  | 0 |  |
| -2.29280472        | -7.55304638  | -10.53579011 | o      | 8.000  | 0 |  |
| -1.39650761        | -4.66176540  | -7.03904088  | c      | 6.000  | 0 |  |
| -2.74142570        | -6.32245673  | -5.11152022  | c      | 6.000  | 0 |  |
| -4.78610938        | -7.74787715  | -6.28050481  | o      | 8.000  | 0 |  |
| -4.76683417        | -10.24363845 | -5.58187305  | c      | 6.000  | 0 |  |
| -6.38614050        | -11.75712011 | -6.16806610  | o      | 8.000  | 0 |  |
| -3.72578405        | -5.20279399  | -3.68666671  | h      | 1.000  | 0 |  |
| -1.18542520        | -8.36033739  | -3.95633063  | c      | 6.000  | 0 |  |
| -2.42565247        | -10.65503183 | -4.17988524  | c      | 6.000  | 0 |  |
| -1.45301042        | -12.90134929 | -3.22254998  | c      | 6.000  | 0 |  |
| -2.84158119        | -15.04127516 | -3.56931472  | o      | 8.000  | 0 |  |
| -1.83379024        | -17.34636310 | -2.63030981  | c      | 6.000  | 0 |  |
| 0.87645498         | -12.76925743 | -1.98288963  | c      | 6.000  | 0 |  |
| 2.14994142         | -10.45188627 | -1.73420167  | c      | 6.000  | 0 |  |
| 1.11890684         | -8.23183601  | -2.71685926  | c      | 6.000  | 0 |  |
| 2.42716425         | 2.80586536   | -9.23565853  | h      | 1.000  | 0 |  |
| 2.10534389         | 4.63719896   | -4.87606034  | h      | 1.000  | 0 |  |
| 5.76347574         | 2.63446720   | -6.68358339  | h      | 1.000  | 0 |  |
| -2.48914726        | 5.11926810   | -4.75001561  | h      | 1.000  | 0 |  |
| -1.41446001        | 5.25948578   | -7.90963771  | h      | 1.000  | 0 |  |
| -2.93909106        | 2.50464302   | -6.77806970  | h      | 1.000  | 0 |  |
| -0.49794284        | 2.16184670   | -1.72248537  | h      | 1.000  | 0 |  |
| 2.60895590         | 1.05163259   | -2.24820718  | h      | 1.000  | 0 |  |
| 2.34949650         | -0.70940319  | -12.07950739 | h      | 1.000  | 0 |  |
| 0.30670255         | -4.70409527  | -13.29649102 | h      | 1.000  | 0 |  |
| -3.83179768        | -7.89092942  | -9.57599821  | h      | 1.000  | 0 |  |
| -3.17322812        | -18.85436456 | -3.08573380  | h      | 1.000  | 0 |  |
| -0.03590480        | -17.80310991 | -3.54720493  | h      | 1.000  | 0 |  |
| -1.62913290        | -17.28626981 | -0.57220907  | h      | 1.000  | 0 |  |
| 1.76538215         | -14.43448410 | -1.17900013  | h      | 1.000  | 0 |  |
| 3.95689755         | -10.38574586 | -0.75456765  | h      | 1.000  | 0 |  |
| 2.11252485         | -6.45076913  | -2.48574576  | h      | 1.000  | 0 |  |

## Diastereomer 2b/3a\_3

| atomic coordinates |              | atom         | charge | isotop |   |
|--------------------|--------------|--------------|--------|--------|---|
| -1.09982061        | -2.52202850  | -1.91372566  | o      | 8.000  | 0 |
| -0.29423036        | -1.29219473  | -3.70972137  | c      | 6.000  | 0 |
| -0.22506638        | -2.38540130  | -6.33492892  | c      | 6.000  | 0 |
| 1.09906472         | -0.99739745  | -8.20273423  | c      | 6.000  | 0 |
| 2.34817369         | 1.50063152   | -7.64432016  | c      | 6.000  | 0 |
| 4.86132048         | 0.95450067   | -6.85498155  | o      | 8.000  | 0 |
| 0.97283101         | 2.97291715   | -5.57884949  | c      | 6.000  | 0 |
| -1.59417297        | 3.97995221   | -6.45908393  | c      | 6.000  | 0 |
| 0.73737114         | 1.33414665   | -3.22462867  | c      | 6.000  | 0 |
| 1.32904439         | -1.97306306  | -10.65427594 | c      | 6.000  | 0 |
| 0.19275207         | -4.24545873  | -11.28298783 | c      | 6.000  | 0 |
| -1.18164575        | -5.56977881  | -9.47527581  | c      | 6.000  | 0 |
| -2.28430095        | -7.73408215  | -10.35966764 | o      | 8.000  | 0 |
| -1.41200337        | -4.72790581  | -6.95683779  | c      | 6.000  | 0 |
| -2.77185029        | -6.32718104  | -4.98698727  | c      | 6.000  | 0 |
| -4.79952643        | -7.80343510  | -6.13216130  | o      | 8.000  | 0 |
| -4.73565369        | -10.28804702 | -5.40442777  | c      | 6.000  | 0 |
| -6.28371734        | -11.86483450 | -6.01726596  | o      | 8.000  | 0 |
| -3.77831843        | -5.16858995  | -3.60994383  | h      | 1.000  | 0 |
| -1.21396007        | -8.31876341  | -3.75337405  | c      | 6.000  | 0 |
| -2.41828253        | -10.63008745 | -3.96086598  | c      | 6.000  | 0 |
| -1.40973570        | -12.81914620 | -2.93814619  | c      | 6.000  | 0 |
| -2.61008974        | -15.09551030 | -3.05587613  | o      | 8.000  | 0 |
| -1.97665354        | -16.38127996 | -5.34301167  | c      | 6.000  | 0 |
| 0.85510108         | -12.64774804 | -1.60059804  | c      | 6.000  | 0 |
| 2.09192683         | -10.31563702 | -1.37364193  | c      | 6.000  | 0 |
| 1.05862458         | -8.13545998  | -2.45267555  | c      | 6.000  | 0 |
| 2.45456528         | 2.65052988   | -9.36604964  | h      | 1.000  | 0 |
| 2.12858752         | 4.61886862   | -5.06446604  | h      | 1.000  | 0 |
| 5.77802663         | 2.54602802   | -6.78808525  | h      | 1.000  | 0 |
| -2.91962688        | 2.46495877   | -6.93264929  | h      | 1.000  | 0 |
| -2.46514774        | 5.13400796   | -4.97772761  | h      | 1.000  | 0 |
| -1.36986247        | 5.17595988   | -8.13319231  | h      | 1.000  | 0 |
| -0.49869873        | 2.26615958   | -1.84701832  | h      | 1.000  | 0 |
| 2.59346015         | 1.09755294   | -2.33229999  | h      | 1.000  | 0 |
| 2.39995219         | -0.96149266  | -12.08895602 | h      | 1.000  | 0 |
| 0.35564646         | -4.98812110  | -13.19236711 | h      | 1.000  | 0 |
| -3.86448994        | -7.98919518  | -9.44126074  | h      | 1.000  | 0 |
| 0.03760555         | -16.85881376 | -5.38175106  | h      | 1.000  | 0 |
| -3.05474230        | -18.14458342 | -5.39743578  | h      | 1.000  | 0 |
| -2.47799788        | -15.27106586 | -7.01579724  | h      | 1.000  | 0 |
| 1.65823468         | -14.32242334 | -0.72300922  | h      | 1.000  | 0 |
| 3.85749796         | -10.19715119 | -0.32673365  | h      | 1.000  | 0 |
| 2.01955032         | -6.33473995  | -2.23138862  | h      | 1.000  | 0 |

## Diastereomer 2b/3a\_4

| atomic coordinates |              | atom         | charge | isotop |   |
|--------------------|--------------|--------------|--------|--------|---|
| -1.12967828        | -2.47459637  | -1.85325442  | o      | 8.000  | 0 |
| -0.38909461        | -1.18769288  | -3.63734486  | c      | 6.000  | 0 |
| -0.25700275        | -2.27031698  | -6.26482008  | c      | 6.000  | 0 |
| 1.06712835         | -0.84905395  | -8.10900381  | c      | 6.000  | 0 |
| 2.26597061         | 1.66333694   | -7.49900022  | c      | 6.000  | 0 |
| 4.76286575         | 1.21944027   | -6.59344345  | o      | 8.000  | 0 |
| 0.78196867         | 3.11615839   | -5.49607949  | c      | 6.000  | 0 |
| -1.77539770        | 4.05686406   | -6.47306790  | c      | 6.000  | 0 |
| 0.49926564         | 1.48872625   | -3.13789025  | c      | 6.000  | 0 |
| 1.34151658         | -1.79448394  | -10.56678162 | c      | 6.000  | 0 |
| 0.26777419         | -4.09050119  | -11.21798125 | c      | 6.000  | 0 |
| -1.09452938        | -5.45790702  | -9.43162313  | c      | 6.000  | 0 |
| -2.12972135        | -7.64507605  | -10.33906962 | o      | 8.000  | 0 |
| -1.38271261        | -4.63341951  | -6.91337409  | c      | 6.000  | 0 |
| -2.75049639        | -6.26463111  | -4.97394816  | c      | 6.000  | 0 |
| -4.74132287        | -7.75392427  | -6.16466459  | o      | 8.000  | 0 |
| -4.65458444        | -10.24628407 | -5.46622181  | c      | 6.000  | 0 |
| -6.16731021        | -11.83724450 | -6.12819288  | o      | 8.000  | 0 |
| -3.78946782        | -5.12890570  | -3.60144007  | h      | 1.000  | 0 |
| -1.18731493        | -8.24884355  | -3.73485473  | c      | 6.000  | 0 |
| -2.35705541        | -10.57358464 | -3.98788906  | c      | 6.000  | 0 |
| -1.33811508        | -12.76018675 | -2.97064948  | c      | 6.000  | 0 |
| -2.50766658        | -15.04977893 | -3.13165415  | o      | 8.000  | 0 |
| -1.81734962        | -16.30701373 | -5.41784483  | c      | 6.000  | 0 |
| 0.89969861         | -12.57367078 | -1.59058249  | c      | 6.000  | 0 |
| 2.10024163         | -10.22776475 | -1.31487144  | c      | 6.000  | 0 |
| 1.05749074         | -8.04928847  | -2.38918075  | c      | 6.000  | 0 |
| 2.42149507         | 2.82684132   | -9.20712367  | h      | 1.000  | 0 |
| 1.88084442         | 4.79177856   | -4.95353911  | h      | 1.000  | 0 |
| 5.51894517         | -0.10147829  | -7.62598981  | h      | 1.000  | 0 |
| -2.71893796        | 5.20940803   | -5.03555323  | h      | 1.000  | 0 |
| -1.52179646        | 5.23756495   | -8.15379032  | h      | 1.000  | 0 |
| -3.05247462        | 2.50785555   | -6.96949895  | h      | 1.000  | 0 |
| -0.83922738        | 2.37670856   | -1.82887695  | h      | 1.000  | 0 |
| 2.32077267         | 1.34189453   | -2.15901211  | h      | 1.000  | 0 |
| 2.37784239         | -0.73850497  | -11.99579253 | h      | 1.000  | 0 |
| 0.45825859         | -4.81577808  | -13.13208485 | h      | 1.000  | 0 |
| -3.73485473        | -7.92362168  | -9.47055149  | h      | 1.000  | 0 |
| 0.20276761         | -16.76092594 | -5.42332503  | h      | 1.000  | 0 |
| -2.87370653        | -18.08184451 | -5.50836271  | h      | 1.000  | 0 |
| -2.30017465        | -15.18697305 | -7.08968554  | h      | 1.000  | 0 |
| 1.70774551         | -14.24664532 | -0.71450545  | h      | 1.000  | 0 |
| 3.84162426         | -10.09718468 | -0.22941275  | h      | 1.000  | 0 |
| 1.98591319         | -6.23798597  | -2.12272937  | h      | 1.000  | 0 |

## Diastereomer 2b/3a\_5

| atomic coordinates |              | atom         | charge | isotop |   |
|--------------------|--------------|--------------|--------|--------|---|
| -1.05711280        | -2.72252844  | -1.85306545  | o      | 8.000  | 0 |
| -0.36736276        | -1.32904439  | -3.57687363  | c      | 6.000  | 0 |
| -0.26588447        | -2.26313602  | -6.26311933  | c      | 6.000  | 0 |
| 0.98511423         | -0.71167086  | -8.05212306  | c      | 6.000  | 0 |
| 2.14672889         | 1.78786990   | -7.32854692  | c      | 6.000  | 0 |
| 4.67291478         | 1.34718576   | -6.50594913  | o      | 8.000  | 0 |
| 0.68256908         | 3.09385963   | -5.21318749  | c      | 6.000  | 0 |
| -1.91523744        | 4.03437632   | -6.07698130  | c      | 6.000  | 0 |
| 0.48849421         | 1.33017823   | -2.94608304  | c      | 6.000  | 0 |
| 1.22208589         | -1.51178091  | -10.56470292 | c      | 6.000  | 0 |
| 0.18292549         | -3.79154652  | -11.31983749 | c      | 6.000  | 0 |
| -1.10567876        | -5.28991037  | -9.58412403  | c      | 6.000  | 0 |
| -2.10855642        | -7.44589891  | -10.59512752 | o      | 8.000  | 0 |
| -1.35247699        | -4.61395533  | -7.01825389  | c      | 6.000  | 0 |
| -2.63711282        | -6.37877057  | -5.14118892  | c      | 6.000  | 0 |
| -4.60601848        | -7.87052038  | -6.36421967  | o      | 8.000  | 0 |
| -4.47298176        | -10.37667517 | -5.72587019  | c      | 6.000  | 0 |
| -6.01915568        | -11.96045465 | -6.32377953  | o      | 8.000  | 0 |
| -3.68458802        | -5.33734249  | -3.70178452  | h      | 1.000  | 0 |
| -0.99966512        | -8.37148677  | -4.01717982  | c      | 6.000  | 0 |
| -2.13293389        | -10.70888903 | -4.31670141  | c      | 6.000  | 0 |
| -1.04766417        | -12.90834128 | -3.40056218  | c      | 6.000  | 0 |
| -2.07605313        | -15.23875154 | -3.78455453  | o      | 8.000  | 0 |
| -3.87412755        | -15.81171651 | -1.85552209  | c      | 6.000  | 0 |
| 1.28369096         | -12.73939976 | -2.18225574  | c      | 6.000  | 0 |
| 2.43963644         | -10.37950976 | -1.84418373  | c      | 6.000  | 0 |
| 1.29313959         | -8.17835676  | -2.75351995  | c      | 6.000  | 0 |
| 2.23838061         | 3.04850620   | -8.97090790  | h      | 1.000  | 0 |
| 1.76103578         | 4.75889732   | -4.60110519  | h      | 1.000  | 0 |
| 5.43145085         | 0.10525775   | -7.63090310  | h      | 1.000  | 0 |
| -2.84725037        | 5.08279638   | -4.55480690  | h      | 1.000  | 0 |
| -1.72475304        | 5.31390989   | -7.69250817  | h      | 1.000  | 0 |
| -3.17247223        | 2.48933624   | -6.63274976  | h      | 1.000  | 0 |
| -0.83129053        | 2.11781608   | -1.55618947  | h      | 1.000  | 0 |
| 2.33626842         | 1.16123671   | -2.02125107  | h      | 1.000  | 0 |
| 2.20247581         | -0.35507954  | -11.95459650 | h      | 1.000  | 0 |
| 0.34487502         | -4.40495162  | -13.27532609 | h      | 1.000  | 0 |
| -3.64169123        | -7.87241010  | -9.66179178  | h      | 1.000  | 0 |
| -4.70428424        | -17.65438846 | -2.29053705  | h      | 1.000  | 0 |
| -2.94986250        | -15.94399734 | -0.00755890  | h      | 1.000  | 0 |
| -5.40310496        | -14.41879937 | -1.78919270  | h      | 1.000  | 0 |
| 2.20965677         | -14.44072020 | -1.49798591  | h      | 1.000  | 0 |
| 4.24659257         | -10.26177983 | -0.87021888  | h      | 1.000  | 0 |
| 2.20039711         | -6.36081817  | -2.45777781  | h      | 1.000  | 0 |

## Diastereomer 2b/3a\_6

| atomic coordinates |              | atom         | charge | isotop |   |
|--------------------|--------------|--------------|--------|--------|---|
| -0.99739745        | -2.77922023  | -1.91296977  | o      | 8.000  | 0 |
| -0.25908145        | -1.43373522  | -3.65473034  | c      | 6.000  | 0 |
| -0.22790097        | -2.37633061  | -6.33908632  | c      | 6.000  | 0 |
| 1.01856239         | -0.85377827  | -8.15473519  | c      | 6.000  | 0 |
| 2.22647533         | 1.63650283   | -7.48388241  | c      | 6.000  | 0 |
| 4.76853493         | 1.10473390   | -6.78222709  | o      | 8.000  | 0 |
| 0.86946299         | 2.95798832   | -5.30748482  | c      | 6.000  | 0 |
| -1.73930393        | 3.95330707   | -6.07017829  | c      | 6.000  | 0 |
| 0.72697764         | 1.18410240   | -3.04529366  | c      | 6.000  | 0 |
| 1.20753500         | -1.68317907  | -10.66259074 | c      | 6.000  | 0 |
| 0.10544672         | -3.94215769  | -11.39278092 | c      | 6.000  | 0 |
| -1.19222822        | -5.40083729  | -9.63193410  | c      | 6.000  | 0 |
| -2.26464780        | -7.53603885  | -10.61648142 | o      | 8.000  | 0 |
| -1.37685446        | -4.70844164  | -7.06530807  | c      | 6.000  | 0 |
| -2.65204166        | -6.44302125  | -5.15592878  | c      | 6.000  | 0 |
| -4.66573382        | -7.91644072  | -6.32831488  | o      | 8.000  | 0 |
| -4.56331067        | -10.41598148 | -5.65878491  | c      | 6.000  | 0 |
| -6.15011370        | -11.97972985 | -6.20094734  | o      | 8.000  | 0 |
| -3.65926569        | -5.37797160  | -3.70556398  | h      | 1.000  | 0 |
| -1.02234184        | -8.45028835  | -4.04665954  | c      | 6.000  | 0 |
| -2.20058608        | -10.77143896 | -4.29364675  | c      | 6.000  | 0 |
| -1.13175698        | -12.97807217 | -3.37486190  | c      | 6.000  | 0 |
| -2.20738910        | -15.29544333 | -3.70556398  | o      | 8.000  | 0 |
| -3.97560584        | -15.81001575 | -1.73325681  | c      | 6.000  | 0 |
| 1.22983377         | -12.83426401 | -2.21286930  | c      | 6.000  | 0 |
| 2.43358932         | -10.49081463 | -1.93224497  | c      | 6.000  | 0 |
| 1.30315514         | -8.28115786  | -2.84082530  | c      | 6.000  | 0 |
| 2.26729342         | 2.88353311   | -9.13947147  | h      | 1.000  | 0 |
| 2.00121998         | 4.59864855   | -4.72696095  | h      | 1.000  | 0 |
| 5.65651724         | 2.70948933   | -6.66393024  | h      | 1.000  | 0 |
| -2.59912932        | 5.00172713   | -4.50624094  | h      | 1.000  | 0 |
| -1.58170077        | 5.24625769   | -7.67852420  | h      | 1.000  | 0 |
| -3.04245908        | 2.43699082   | -6.59835674  | h      | 1.000  | 0 |
| -0.49510825        | 2.00858991   | -1.58888173  | h      | 1.000  | 0 |
| 2.60876693         | 0.94051670   | -2.21060163  | h      | 1.000  | 0 |
| 2.21967232         | -0.56805168  | -12.06268883 | h      | 1.000  | 0 |
| 0.23697166         | -4.57200341  | -13.34467904 | h      | 1.000  | 0 |
| -3.77094850        | -7.94157408  | -9.63269000  | h      | 1.000  | 0 |
| -4.84506883        | -17.64437291 | -2.12499704  | h      | 1.000  | 0 |
| -3.01675880        | -15.93209206 | 0.09769884   | h      | 1.000  | 0 |
| -5.47944990        | -14.39083143 | -1.65634496  | h      | 1.000  | 0 |
| 2.14351635         | -14.54295438 | -1.53086714  | h      | 1.000  | 0 |
| 4.26719058         | -10.39235990 | -1.00741300  | h      | 1.000  | 0 |
| 2.25066383         | -6.47665838  | -2.59686165  | h      | 1.000  | 0 |

## Diastereomer 2b/3a\_7

| atomic coordinates | atom         | charge       | isotop |       |   |
|--------------------|--------------|--------------|--------|-------|---|
| 0.11036001         | -2.58287768  | -1.72872147  | o      | 8.000 | 0 |
| 0.17290994         | -1.20129890  | -3.59482602  | c      | 6.000 | 0 |
| -0.04081808        | -2.28524581  | -6.20189220  | c      | 6.000 | 0 |
| 0.93276882         | -0.82184190  | -8.21331670  | c      | 6.000 | 0 |
| 1.88519079         | 1.82963284   | -7.80305715  | c      | 6.000 | 0 |
| 4.49565847         | 1.64425071   | -7.18832924  | o      | 8.000 | 0 |
| 0.45466811         | 3.16434641   | -5.67333580  | c      | 6.000 | 0 |
| -2.28713554        | 3.76131090   | -6.38708536  | c      | 6.000 | 0 |
| 0.61756250         | 1.60740105   | -3.25146279  | c      | 6.000 | 0 |
| 1.05408924         | -1.85457723  | -10.64860676 | c      | 6.000 | 0 |
| 0.18651597         | -4.28873346  | -11.10195206 | c      | 6.000 | 0 |
| -0.86360484        | -5.68713080  | -9.13304641  | c      | 6.000 | 0 |
| -1.67165174        | -8.09048450  | -9.63174513  | o      | 8.000 | 0 |
| -1.07241958        | -4.71902410  | -6.66052873  | c      | 6.000 | 0 |
| -2.39787349        | -6.23685213  | -4.60960896  | c      | 6.000 | 0 |
| -4.78308582        | -7.23935185  | -5.52820483  | o      | 8.000 | 0 |
| -4.93823233        | -9.80465507  | -5.23151783  | c      | 6.000 | 0 |
| -6.75350326        | -11.08456658 | -5.81676601  | o      | 8.000 | 0 |
| -2.97839736        | -5.07013522  | -3.01260140  | h      | 1.000 | 0 |
| -1.04823109        | -8.52720021  | -3.71463466  | c      | 6.000 | 0 |
| -2.56265761        | -10.63065437 | -4.07538338  | c      | 6.000 | 0 |
| -1.79864133        | -13.04855895 | -3.38941279  | c      | 6.000 | 0 |
| -3.43438828        | -14.98722900 | -3.83349844  | o      | 8.000 | 0 |
| -2.66867125        | -17.45540030 | -3.10727668  | c      | 6.000 | 0 |
| 0.59715346         | -13.28666445 | -2.29242677  | c      | 6.000 | 0 |
| 2.13765820         | -11.15448645 | -1.90522189  | c      | 6.000 | 0 |
| 1.31562733         | -8.75245556  | -2.61235741  | c      | 6.000 | 0 |
| 1.71681619         | 2.93039832   | -9.55143177  | h      | 1.000 | 0 |
| 1.38894871         | 4.97923939   | -5.29425674  | h      | 1.000 | 0 |
| 5.17369221         | 3.35086238   | -7.12407855  | h      | 1.000 | 0 |
| -3.20119607        | 4.85848589   | -4.88853254  | h      | 1.000 | 0 |
| -2.35818924        | 4.89023329   | -8.12034217  | h      | 1.000 | 0 |
| -3.41643588        | 2.05564409   | -6.68944154  | h      | 1.000 | 0 |
| -0.74152853        | 2.31056814   | -1.85533312  | h      | 1.000 | 0 |
| 2.51333576         | 1.80865688   | -2.43566801  | h      | 1.000 | 0 |
| 1.86402586         | -0.77252004  | -12.19856014 | h      | 1.000 | 0 |
| 0.34298529         | -5.06956830  | -12.99394587 | h      | 1.000 | 0 |
| -1.66447078        | -8.39435246  | -11.44191380 | h      | 1.000 | 0 |
| -2.36140178        | -17.57086257 | -1.06429376  | h      | 1.000 | 0 |
| -4.19934941        | -18.76006722 | -3.58764507  | h      | 1.000 | 0 |
| -0.98398040        | -18.05066403 | -4.15097243  | h      | 1.000 | 0 |
| 1.33357973         | -15.10854941 | -1.70396605  | h      | 1.000 | 0 |
| 3.98770009         | -11.38087564 | -1.03727067  | h      | 1.000 | 0 |
| 2.49765103         | -7.10366951  | -2.29280472  | h      | 1.000 | 0 |

Diastereomer **2b/3a**\_8

| atomic coordinates |              | atom         | charge | isotop |   |
|--------------------|--------------|--------------|--------|--------|---|
| 0.05272336         | -2.50672172  | -1.70869037  | o      | 8.000  | 0 |
| 0.13776104         | -1.17937808  | -3.61258945  | c      | 6.000  | 0 |
| -0.05102261        | -2.33778020  | -6.18979795  | c      | 6.000  | 0 |
| 0.93522546         | -0.92898937  | -8.23391471  | c      | 6.000  | 0 |
| 1.88122237         | 1.73457962   | -7.89149634  | c      | 6.000  | 0 |
| 4.48772162         | 1.56922858   | -7.25598144  | o      | 8.000  | 0 |
| 0.43595982         | 3.12636292   | -5.80901814  | c      | 6.000  | 0 |
| -2.30168643        | 3.70046172   | -6.55678277  | c      | 6.000  | 0 |
| 0.58430332         | 1.63706975   | -3.34424834  | c      | 6.000  | 0 |
| 1.07789979         | -2.02937690  | -10.63802430 | c      | 6.000  | 0 |
| 0.21958618         | -4.47713916  | -11.02957555 | c      | 6.000  | 0 |
| -0.84262888        | -5.82394697  | -9.03081222  | c      | 6.000  | 0 |
| -1.64047126        | -8.24298540  | -9.47357505  | o      | 8.000  | 0 |
| -1.07260855        | -4.78705424  | -6.58777428  | c      | 6.000  | 0 |
| -2.40751109        | -6.24932432  | -4.50321738  | c      | 6.000  | 0 |
| -4.77949534        | -7.29755541  | -5.41519921  | o      | 8.000  | 0 |
| -4.91177617        | -9.85341001  | -5.05388357  | c      | 6.000  | 0 |
| -6.68566209        | -11.18698974 | -5.64612374  | o      | 8.000  | 0 |
| -3.01335729        | -5.03989960  | -2.94797277  | h      | 1.000  | 0 |
| -1.05049876        | -8.50414555  | -3.52981945  | c      | 6.000  | 0 |
| -2.54583905        | -10.62290649 | -3.85768693  | c      | 6.000  | 0 |
| -1.74497311        | -12.99526868 | -3.09574935  | c      | 6.000  | 0 |
| -3.20062915        | -15.11081708 | -3.31098916  | o      | 8.000  | 0 |
| -2.97291715        | -16.16792988 | -5.78293992  | c      | 6.000  | 0 |
| 0.60093291         | -13.20257163 | -1.90389908  | c      | 6.000  | 0 |
| 2.12102861         | -11.05716555 | -1.55751228  | c      | 6.000  | 0 |
| 1.29729699         | -8.68499234  | -2.37444089  | c      | 6.000  | 0 |
| 1.72248537         | 2.78602324   | -9.67086246  | h      | 1.000  | 0 |
| 1.36608302         | 4.95202733   | -5.47415866  | h      | 1.000  | 0 |
| 5.16254283         | 3.27829690   | -7.22725760  | h      | 1.000  | 0 |
| -3.42739629        | 1.98591319   | -6.81983264  | h      | 1.000  | 0 |
| -3.22670737        | 4.83713198   | -5.09470166  | h      | 1.000  | 0 |
| -2.36253561        | 4.78157404   | -8.32065314  | h      | 1.000  | 0 |
| -0.78159073        | 2.38011007   | -1.97570867  | h      | 1.000  | 0 |
| 2.47591918         | 1.85892360   | -2.52391822  | h      | 1.000  | 0 |
| 1.89841887         | -0.98889369  | -12.21103233 | h      | 1.000  | 0 |
| 0.39438584         | -5.30899660  | -12.89813675 | h      | 1.000  | 0 |
| -1.63744770        | -8.57538822  | -11.27920838 | h      | 1.000  | 0 |
| -1.04029424        | -16.83122376 | -6.11817733  | h      | 1.000  | 0 |
| -4.23771086        | -17.79989737 | -5.89216609  | h      | 1.000  | 0 |
| -3.52887458        | -14.82754714 | -7.25749322  | h      | 1.000  | 0 |
| 1.24646336         | -15.03201550 | -1.22869993  | h      | 1.000  | 0 |
| 3.94310255         | -11.23914618 | -0.62379860  | h      | 1.000  | 0 |
| 2.46023445         | -7.01806492  | -2.07756491  | h      | 1.000  | 0 |



## Diastereomer 2b/3a\_9

| atomic coordinates |              | atom         | charge | isotop |   |
|--------------------|--------------|--------------|--------|--------|---|
| -1.77955510        | -2.63333337  | -2.01803854  | o      | 8.000  | 0 |
| -1.00042102        | -1.33490254  | -3.77094850  | c      | 6.000  | 0 |
| -0.56332736        | -2.40278678  | -6.36289687  | c      | 6.000  | 0 |
| 0.85774669         | -0.90536779  | -8.07536669  | c      | 6.000  | 0 |
| 1.85552209         | 1.70283222   | -7.41509638  | c      | 6.000  | 0 |
| 4.32104778         | 1.98818087   | -8.46446130  | o      | 8.000  | 0 |
| 1.99989717         | 2.17167327   | -4.56387759  | c      | 6.000  | 0 |
| 2.64183714         | 4.92424836   | -3.95009454  | c      | 6.000  | 0 |
| -0.50776941        | 1.44299488   | -3.37146040  | c      | 6.000  | 0 |
| 1.29351754         | -1.81829449  | -10.52690840 | c      | 6.000  | 0 |
| 0.37019735         | -4.15399599  | -11.26975974 | c      | 6.000  | 0 |
| -1.03689273        | -5.60492771  | -9.59130499  | c      | 6.000  | 0 |
| -1.90257627        | -7.82875743  | -10.58265532 | o      | 8.000  | 0 |
| -1.53332379        | -4.81294349  | -7.09818930  | c      | 6.000  | 0 |
| -2.96668106        | -6.50859475  | -5.26609982  | c      | 6.000  | 0 |
| -4.79234548        | -8.08651607  | -6.58966400  | o      | 8.000  | 0 |
| -4.68746568        | -10.56092347 | -5.82564773  | c      | 6.000  | 0 |
| -6.14142096        | -12.18816665 | -6.52919277  | o      | 8.000  | 0 |
| -4.15418496        | -5.41822277  | -3.98014118  | h      | 1.000  | 0 |
| -1.41672768        | -8.41495047  | -3.89850501  | c      | 6.000  | 0 |
| -2.48158836        | -10.78958033 | -4.18309777  | c      | 6.000  | 0 |
| -1.47625406        | -12.94651374 | -3.06759243  | c      | 6.000  | 0 |
| -2.68530084        | -15.17884723 | -3.49467054  | o      | 8.000  | 0 |
| -1.64236098        | -17.39303934 | -2.38955870  | c      | 6.000  | 0 |
| 0.69787586         | -12.63697660 | -1.59908625  | c      | 6.000  | 0 |
| 1.79089346         | -10.23664647 | -1.28520274  | c      | 6.000  | 0 |
| 0.73170196         | -8.10975970  | -2.43094370  | c      | 6.000  | 0 |
| 0.60660209         | 3.09121401   | -8.31933033  | h      | 1.000  | 0 |
| 3.51016629         | 0.99172828   | -3.76112192  | h      | 1.000  | 0 |
| 4.71222109         | 3.78190891   | -8.50301171  | h      | 1.000  | 0 |
| 4.50869758         | 5.44014359   | -4.67499348  | h      | 1.000  | 0 |
| 1.25194356         | 6.22022254   | -4.77023568  | h      | 1.000  | 0 |
| 2.66829330         | 5.23000605   | -1.90295422  | h      | 1.000  | 0 |
| -2.09532834        | 2.52146158   | -4.15021654  | h      | 1.000  | 0 |
| -0.44465256        | 1.79712955   | -1.33036720  | h      | 1.000  | 0 |
| 2.37859828         | -0.70524579  | -11.87560594 | h      | 1.000  | 0 |
| 0.72546586         | -4.84336808  | -13.17309191 | h      | 1.000  | 0 |
| -3.50959938        | -8.24166259  | -9.77649815  | h      | 1.000  | 0 |
| -1.65917955        | -17.27323070 | -0.32389906  | h      | 1.000  | 0 |
| -2.83137667        | -18.99363737 | -2.93682338  | h      | 1.000  | 0 |
| 0.26664036         | -17.75416600 | -3.10160750  | h      | 1.000  | 0 |
| 1.59984214         | -14.22340169 | -0.66178209  | h      | 1.000  | 0 |
| 3.47709609         | -10.03293399 | -0.12566679  | h      | 1.000  | 0 |
| 1.58113386         | -6.26349727  | -2.14672889  | h      | 1.000  | 0 |

Diastereomer **2b/3a**\_10

| atomic coordinates |              |              | atom | charge | isotop |  |
|--------------------|--------------|--------------|------|--------|--------|--|
| 0.04667624         | -2.49141493  | -1.67939962  | o    | 8.000  | 0      |  |
| 0.04837699         | -1.08583664  | -3.52811869  | c    | 6.000  | 0      |  |
| -0.09845473        | -2.16562615  | -6.14066507  | c    | 6.000  | 0      |  |
| 0.87834471         | -0.67501018  | -8.13073566  | c    | 6.000  | 0      |  |
| 1.78522428         | 1.98666908   | -7.66945351  | c    | 6.000  | 0      |  |
| 4.37452703         | 1.91637127   | -6.93775156  | o    | 8.000  | 0      |  |
| 0.24736515         | 3.29190293   | -5.59680189  | c    | 6.000  | 0      |  |
| -2.47913172        | 3.82915207   | -6.41014002  | c    | 6.000  | 0      |  |
| 0.35318981         | 1.74005982   | -3.16623614  | c    | 6.000  | 0      |  |
| 1.04161705         | -1.67996653  | -10.57434053 | c    | 6.000  | 0      |  |
| 0.23035762         | -4.12905160  | -11.05074049 | c    | 6.000  | 0      |  |
| -0.80672409        | -5.56467655  | -9.10073209  | c    | 6.000  | 0      |  |
| -1.55146516        | -7.98258113  | -9.62286342  | o    | 8.000  | 0      |  |
| -1.06731732        | -4.61773478  | -6.62462394  | c    | 6.000  | 0      |  |
| -2.39522787        | -6.17014480  | -4.59978238  | c    | 6.000  | 0      |  |
| -4.74642513        | -7.20741547  | -5.56467655  | o    | 8.000  | 0      |  |
| -4.85678514        | -9.77857685  | -5.29973694  | c    | 6.000  | 0      |  |
| -6.63350565        | -11.08664528 | -5.93808643  | o    | 8.000  | 0      |  |
| -3.01808161        | -5.02194720  | -3.00466455  | h    | 1.000  | 0      |  |
| -1.02064108        | -8.44254048  | -3.69781610  | c    | 6.000  | 0      |  |
| -2.48820240        | -10.57075005 | -4.10656386  | c    | 6.000  | 0      |  |
| -1.69319462        | -12.98033984 | -3.42588451  | c    | 6.000  | 0      |  |
| -3.28283224        | -14.94452118 | -3.92137070  | o    | 8.000  | 0      |  |
| -2.49746206        | -17.40173208 | -3.17870833  | c    | 6.000  | 0      |  |
| 0.68351394         | -13.18367437 | -2.28222225  | c    | 6.000  | 0      |  |
| 2.17488581         | -11.02674096 | -1.84361682  | c    | 6.000  | 0      |  |
| 1.32299727         | -8.63396973  | -2.54697288  | c    | 6.000  | 0      |  |
| 1.66314797         | 3.10066264   | -9.41253690  | h    | 1.000  | 0      |  |
| 1.12911137         | 5.12644906   | -5.18673132  | h    | 1.000  | 0      |  |
| 5.19069974         | 0.52723359   | -7.82346619  | h    | 1.000  | 0      |  |
| -3.46726951        | 4.91461076   | -4.95051555  | h    | 1.000  | 0      |  |
| -2.51257987        | 4.94786994   | -8.15095573  | h    | 1.000  | 0      |  |
| -3.56232274        | 2.09910779   | -6.74122004  | h    | 1.000  | 0      |  |
| -1.09830883        | 2.38275568   | -1.83586894  | h    | 1.000  | 0      |  |
| 2.19869636         | 2.01992826   | -2.26275807  | h    | 1.000  | 0      |  |
| 1.81848346         | -0.56313839  | -12.11767986 | h    | 1.000  | 0      |  |
| 0.41177132         | -4.89401274  | -12.94764758 | h    | 1.000  | 0      |  |
| -1.61193639        | -8.24865457  | -11.43851229 | h    | 1.000  | 0      |  |
| -3.99677077        | -18.72869777 | -3.69554843  | h    | 1.000  | 0      |  |
| -0.78026792        | -17.97035067 | -4.18347572  | h    | 1.000  | 0      |  |
| -2.23592396        | -17.51473770 | -1.12930034  | h    | 1.000  | 0      |  |
| 1.44148309         | -14.99705557 | -1.69432845  | h    | 1.000  | 0      |  |
| 4.00905399         | -11.22705193 | -0.93579238  | h    | 1.000  | 0      |  |
| 2.46495877         | -6.96685334  | -2.18206677  | h    | 1.000  | 0      |  |

## Diastereomer 2b/3a\_11

| atomic coordinates |              | atom         | charge | isotop |   |
|--------------------|--------------|--------------|--------|--------|---|
| 0.13549336         | -2.70835550  | -1.71983975  | o      | 8.000  | 0 |
| 0.16742974         | -1.28936014  | -3.55854328  | c      | 6.000  | 0 |
| -0.05895946        | -2.32228445  | -6.18564055  | c      | 6.000  | 0 |
| 0.86511662         | -0.80105491  | -8.17760087  | c      | 6.000  | 0 |
| 1.78276763         | 1.85552209   | -7.72387763  | c      | 6.000  | 0 |
| 4.40400676         | 1.69697407   | -7.15015677  | o      | 8.000  | 0 |
| 0.36415023         | 3.12277244   | -5.54596826  | c      | 6.000  | 0 |
| -2.39617274        | 3.69403665   | -6.20756138  | c      | 6.000  | 0 |
| 0.58524818         | 1.51650522   | -3.16132285  | c      | 6.000  | 0 |
| 0.97169718         | -1.78012202  | -10.63575663 | c      | 6.000  | 0 |
| 0.13813898         | -4.21805770  | -11.13048693 | c      | 6.000  | 0 |
| -0.86247101        | -5.67560347  | -9.17896675  | c      | 6.000  | 0 |
| -1.63858153        | -8.08084689  | -9.71753870  | o      | 8.000  | 0 |
| -1.05522307        | -4.76343267  | -6.68358339  | c      | 6.000  | 0 |
| -2.31585938        | -6.35325926  | -4.64702554  | c      | 6.000  | 0 |
| -4.69237896        | -7.39752192  | -5.55163744  | o      | 8.000  | 0 |
| -4.77684972        | -9.96925022  | -5.30483920  | c      | 6.000  | 0 |
| -6.57076674        | -11.29659386 | -5.84908033  | o      | 8.000  | 0 |
| -2.90299729        | -5.23454139  | -3.01864853  | h      | 1.000  | 0 |
| -0.89743094        | -8.62886747  | -3.81951446  | c      | 6.000  | 0 |
| -2.36933863        | -10.75443143 | -4.20634140  | c      | 6.000  | 0 |
| -1.51083604        | -13.14701369 | -3.58310972  | c      | 6.000  | 0 |
| -2.86879324        | -15.28996312 | -4.03588810  | o      | 8.000  | 0 |
| -4.58031820        | -15.77259918 | -2.00651121  | c      | 6.000  | 0 |
| 0.92218635         | -13.38493021 | -2.58760200  | c      | 6.000  | 0 |
| 2.41223541         | -11.23177625 | -2.16524820  | c      | 6.000  | 0 |
| 1.49930871         | -8.82955639  | -2.77279516  | c      | 6.000  | 0 |
| 1.57244112         | 2.99049161   | -9.44579608  | h      | 1.000  | 0 |
| 1.27707692         | 4.94276768   | -5.14081097  | h      | 1.000  | 0 |
| 5.05936378         | 3.41190053   | -7.06681985  | h      | 1.000  | 0 |
| -3.30456409        | 4.74396849   | -4.67215889  | h      | 1.000  | 0 |
| -2.50917836        | 4.85943075   | -7.91398408  | h      | 1.000  | 0 |
| -3.50449712        | 1.97854326   | -6.53164941  | h      | 1.000  | 0 |
| -0.75966991        | 2.17318505   | -1.72928839  | h      | 1.000  | 0 |
| 2.49122596         | 1.72305229   | -2.37122835  | h      | 1.000  | 0 |
| 1.74383928         | -0.65233346  | -12.17248192 | h      | 1.000  | 0 |
| 0.28062433         | -4.95429501  | -13.04137800 | h      | 1.000  | 0 |
| -1.56393735        | -8.37904568  | -11.52732942 | h      | 1.000  | 0 |
| -5.69279998        | -17.44368400 | -2.50067459  | h      | 1.000  | 0 |
| -3.54607109        | -16.18399256 | -0.26059323  | h      | 1.000  | 0 |
| -5.88838663        | -14.19864628 | -1.70302119  | h      | 1.000  | 0 |
| 1.66598256         | -15.24612148 | -2.13841409  | h      | 1.000  | 0 |
| 4.29610339         | -11.43643359 | -1.36872864  | h      | 1.000  | 0 |
| 2.64920707         | -7.16073924  | -2.43831363  | h      | 1.000  | 0 |

Diastereomer **2b/3a**\_12

| atomic coordinates |              |              | atom | charge | isotop |  |
|--------------------|--------------|--------------|------|--------|--------|--|
| -1.77275209        | -2.55453179  | -1.99857436  | o    | 8.000  | 0      |  |
| -1.09906472        | -1.22189692  | -3.76849186  | c    | 6.000  | 0      |  |
| -0.64874298        | -2.28108842  | -6.36081817  | c    | 6.000  | 0      |  |
| 0.72773353         | -0.75022128  | -8.08009100  | c    | 6.000  | 0      |  |
| 1.68752544         | 1.87082887   | -7.41585227  | c    | 6.000  | 0      |  |
| 4.17516092         | 2.23781369   | -8.39302965  | o    | 8.000  | 0      |  |
| 1.77331900         | 2.36914965   | -4.56671218  | c    | 6.000  | 0      |  |
| 2.33532356         | 5.14723604   | -3.99412516  | c    | 6.000  | 0      |  |
| -0.72508792        | 1.57848824   | -3.39602684  | c    | 6.000  | 0      |  |
| 1.15178808         | -1.63272338  | -10.54429388 | c    | 6.000  | 0      |  |
| 0.28497070         | -3.99110159  | -11.28166502 | c    | 6.000  | 0      |  |
| -1.06259301        | -5.48530805  | -9.58998218  | c    | 6.000  | 0      |  |
| -1.87196271        | -7.73200345  | -10.57566334 | o    | 8.000  | 0      |  |
| -1.56355940        | -4.71108725  | -7.09214218  | c    | 6.000  | 0      |  |
| -2.95572065        | -6.43810797  | -5.25684016  | c    | 6.000  | 0      |  |
| -4.76248780        | -8.03700525  | -6.57927051  | o    | 8.000  | 0      |  |
| -4.60488464        | -10.51651491 | -5.84171040  | c    | 6.000  | 0      |  |
| -6.02784842        | -12.16530096 | -6.55791660  | o    | 8.000  | 0      |  |
| -4.14946064        | -5.37230243  | -3.95519680  | h    | 1.000  | 0      |  |
| -1.36570508        | -8.32632232  | -3.91003234  | c    | 6.000  | 0      |  |
| -2.38729102        | -10.71814869 | -4.21144366  | c    | 6.000  | 0      |  |
| -1.33868199        | -12.86544449 | -3.11748120  | c    | 6.000  | 0      |  |
| -2.50653274        | -15.11610832 | -3.56099993  | o    | 8.000  | 0      |  |
| -1.42617631        | -17.31858413 | -2.46836028  | c    | 6.000  | 0      |  |
| 0.83318025         | -12.52756146 | -1.65199859  | c    | 6.000  | 0      |  |
| 1.88065545         | -10.10965687 | -1.31827295  | c    | 6.000  | 0      |  |
| 0.77913409         | -7.99316360  | -2.44322692  | c    | 6.000  | 0      |  |
| 0.44616434         | 3.25221868   | -8.33822759  | h    | 1.000  | 0      |  |
| 3.30796560         | 1.24495158   | -3.73050836  | h    | 1.000  | 0      |  |
| 5.12134680         | 0.68181319   | -8.13772765  | h    | 1.000  | 0      |  |
| 4.16382256         | 5.71585464   | -4.77722767  | h    | 1.000  | 0      |  |
| 0.88250210         | 6.38727433   | -4.79140061  | h    | 1.000  | 0      |  |
| 2.40051911         | 5.47359175   | -1.95133121  | h    | 1.000  | 0      |  |
| -2.33891404        | 2.58665713   | -4.21371133  | h    | 1.000  | 0      |  |
| -0.70505682        | 1.96323648   | -1.36003590  | h    | 1.000  | 0      |  |
| 2.15995697         | -0.47054181  | -11.91321149 | h    | 1.000  | 0      |  |
| 0.62398757         | -4.66252129  | -13.19482376 | h    | 1.000  | 0      |  |
| -3.48219835        | -8.16985299  | -9.78745857  | h    | 1.000  | 0      |  |
| -1.44393974        | -17.21049179 | -0.40194475  | h    | 1.000  | 0      |  |
| -2.58873583        | -18.93581175 | -3.02393976  | h    | 1.000  | 0      |  |
| 0.48811626         | -17.64361702 | -3.18324367  | h    | 1.000  | 0      |  |
| 1.76651599         | -14.10491586 | -0.72962326  | h    | 1.000  | 0      |  |
| 3.56307863         | -9.88459049  | -0.15684727  | h    | 1.000  | 0      |  |
| 1.59039351         | -6.13329514  | -2.13860307  | h    | 1.000  | 0      |  |

## Diastereomer 2b/3a\_13

| atomic coordinates |              | atom         | charge | isotop |   |
|--------------------|--------------|--------------|--------|--------|---|
| 0.06689631         | -2.61500302  | -1.66768331  | o      | 8.000  | 0 |
| 0.03798350         | -1.17389787  | -3.48881239  | c      | 6.000  | 0 |
| -0.11829686        | -2.20379862  | -6.12157884  | c      | 6.000  | 0 |
| 0.80993662         | -0.65705778  | -8.09199628  | c      | 6.000  | 0 |
| 1.68072242         | 2.00896785   | -7.58762837  | c      | 6.000  | 0 |
| 4.27966278         | 1.96437032   | -6.88975251  | o      | 8.000  | 0 |
| 0.15004426         | 3.24730539   | -5.46905640  | c      | 6.000  | 0 |
| -2.59478295        | 3.75809836   | -6.23609624  | c      | 6.000  | 0 |
| 0.31218276         | 1.64765222   | -3.07307264  | c      | 6.000  | 0 |
| 0.96073677         | -1.60910180  | -10.55752196 | c      | 6.000  | 0 |
| 0.18481522         | -4.06121043  | -11.07511795 | c      | 6.000  | 0 |
| -0.80388950        | -5.55428305  | -9.14325093  | c      | 6.000  | 0 |
| -1.51612728        | -7.97313250  | -9.70506651  | o      | 8.000  | 0 |
| -1.05049876        | -4.66252129  | -6.64503298  | c      | 6.000  | 0 |
| -2.31415862        | -6.28522912  | -4.63455334  | c      | 6.000  | 0 |
| -4.65477341        | -7.36520761  | -5.58735326  | o      | 8.000  | 0 |
| -4.69313485        | -9.94071535  | -5.37022373  | c      | 6.000  | 0 |
| -6.44793454        | -11.29697180 | -5.96794410  | o      | 8.000  | 0 |
| -2.94494921        | -5.18465262  | -3.00957784  | h      | 1.000  | 0 |
| -0.86965197        | -8.54061726  | -3.79683775  | c      | 6.000  | 0 |
| -2.29242677        | -10.68999177 | -4.23204168  | c      | 6.000  | 0 |
| -1.40142090        | -13.07180259 | -3.61296740  | c      | 6.000  | 0 |
| -2.70816652        | -15.23516106 | -4.11487866  | o      | 8.000  | 0 |
| -4.44936018        | -15.77335507 | -2.12480806  | c      | 6.000  | 0 |
| 1.01402704         | -13.27268047 | -2.56775987  | c      | 6.000  | 0 |
| 2.45229760         | -11.09552700 | -2.09287169  | c      | 6.000  | 0 |
| 1.50686762         | -8.70540138  | -2.69890686  | c      | 6.000  | 0 |
| 1.51877289         | 3.15622059   | -9.30557840  | h      | 1.000  | 0 |
| 1.00873581         | 5.08657583   | -5.03252967  | h      | 1.000  | 0 |
| 5.10887460         | 0.61529483   | -7.82441106  | h      | 1.000  | 0 |
| -3.58065308        | 4.79706979   | -4.74151184  | h      | 1.000  | 0 |
| -2.66829330        | 4.91196514   | -7.95253449  | h      | 1.000  | 0 |
| -3.65510829        | 2.01822751   | -6.58985297  | h      | 1.000  | 0 |
| -1.12816650        | 2.24386081   | -1.70944626  | h      | 1.000  | 0 |
| 2.16675999         | 1.93318984   | -2.19019259  | h      | 1.000  | 0 |
| 1.70018660         | -0.44805407  | -12.08649938 | h      | 1.000  | 0 |
| 0.35413468         | -4.78214095  | -12.99035539 | h      | 1.000  | 0 |
| -1.50195433        | -8.23561546  | -11.52222716 | h      | 1.000  | 0 |
| -5.79371135        | -14.22850395 | -1.83114462  | h      | 1.000  | 0 |
| -5.51894517        | -17.46031359 | -2.65865570  | h      | 1.000  | 0 |
| -3.44175821        | -16.18342564 | -0.36320536  | h      | 1.000  | 0 |
| 1.78295661         | -15.12366722 | -2.11819402  | h      | 1.000  | 0 |
| 4.32048086         | -11.27221639 | -1.25364432  | h      | 1.000  | 0 |
| 2.61538097         | -7.01882081  | -2.31850499  | h      | 1.000  | 0 |

Diastereomer **2b/3a**\_14

| atomic coordinates |              | atom         | charge | isotop |   |
|--------------------|--------------|--------------|--------|--------|---|
| -0.00396842        | -2.41639281  | -1.66295900  | o      | 8.000  | 0 |
| 0.01587370         | -1.06372684  | -3.55041746  | c      | 6.000  | 0 |
| -0.10771439        | -2.21778259  | -6.13253925  | c      | 6.000  | 0 |
| 0.88099032         | -0.78177970  | -8.15624697  | c      | 6.000  | 0 |
| 1.78106688         | 1.89350559   | -7.76375085  | c      | 6.000  | 0 |
| 4.36507840         | 1.84758524   | -7.01239574  | o      | 8.000  | 0 |
| 0.22733405         | 3.25429738   | -5.73928724  | c      | 6.000  | 0 |
| -2.49424952        | 3.76433446   | -6.58626249  | c      | 6.000  | 0 |
| 0.31841885         | 1.77124031   | -3.26582470  | c      | 6.000  | 0 |
| 1.06372684         | -1.85438826  | -10.56942724 | c      | 6.000  | 0 |
| 0.25945940         | -4.31689038  | -10.98308829 | c      | 6.000  | 0 |
| -0.78971655        | -5.70073683  | -9.00152147  | c      | 6.000  | 0 |
| -1.52784358        | -8.13357025  | -9.46733896  | o      | 8.000  | 0 |
| -1.06845116        | -4.68557595  | -6.55432612  | c      | 6.000  | 0 |
| -2.40429856        | -6.18261699  | -4.49376875  | c      | 6.000  | 0 |
| -4.74359054        | -7.26448520  | -5.44770250  | o      | 8.000  | 0 |
| -4.83335253        | -9.82619795  | -5.11567762  | c      | 6.000  | 0 |
| -6.56944393        | -11.18680077 | -5.75629478  | o      | 8.000  | 0 |
| -3.04869517        | -4.99208953  | -2.93890208  | h      | 1.000  | 0 |
| -1.02271978        | -8.42061965  | -3.51659136  | c      | 6.000  | 0 |
| -2.47365151        | -10.56338012 | -3.88716666  | c      | 6.000  | 0 |
| -1.64387276        | -12.92742751 | -3.13089826  | c      | 6.000  | 0 |
| -3.05871072        | -15.06565263 | -3.38638923  | o      | 8.000  | 0 |
| -2.76863776        | -16.10292330 | -5.86022971  | c      | 6.000  | 0 |
| 0.68426983         | -13.10279409 | -1.89955271  | c      | 6.000  | 0 |
| 2.15825622         | -10.93319952 | -1.50743454  | c      | 6.000  | 0 |
| 1.30655665         | -8.56915213  | -2.31926088  | c      | 6.000  | 0 |
| 1.66957304         | 2.95779934   | -9.53820369  | h      | 1.000  | 0 |
| 1.10378903         | 5.10074878   | -5.37494804  | h      | 1.000  | 0 |
| 5.19088872         | 0.43747160   | -7.85464668  | h      | 1.000  | 0 |
| -3.49391465        | 4.88872151   | -5.16443255  | h      | 1.000  | 0 |
| -2.51692624        | 4.83391945   | -8.35788075  | h      | 1.000  | 0 |
| -3.57271623        | 2.02408566   | -6.87652443  | h      | 1.000  | 0 |
| -1.14177253        | 2.45040788   | -1.96323648  | h      | 1.000  | 0 |
| 2.15806724         | 2.07680902   | -2.35856719  | h      | 1.000  | 0 |
| 1.85060880         | -0.77951203  | -12.13733301 | h      | 1.000  | 0 |
| 0.45712475         | -5.13268515  | -12.85731867 | h      | 1.000  | 0 |
| -1.59303913        | -8.42855650  | -11.27883043 | h      | 1.000  | 0 |
| -0.81957422        | -16.73239108 | -6.16390870  | h      | 1.000  | 0 |
| -4.00451865        | -17.75416600 | -6.00309301  | h      | 1.000  | 0 |
| -3.31892601        | -14.76159570 | -7.33610582  | h      | 1.000  | 0 |
| 1.34983138         | -14.92581290 | -1.22643226  | h      | 1.000  | 0 |
| 3.96464543         | -11.09061371 | -0.53894989  | h      | 1.000  | 0 |
| 2.43113267         | -6.88408333  | -1.98099991  | h      | 1.000  | 0 |

Table S6. ECD calculation of donghaecyclinone B (**2c**).

total energy = -1222.730359

kinetic energy = 1211.487262306

potential energy = -2434.217620952

Parameters of Level DFT

DFT settings (Functional B3LYP / Gridsize M3)

Geometry optimization options (Energy 10<sup>-6</sup> Hartree, Gradient norm | dE / dxyz | = 10<sup>-3</sup>

Hartree/Bohr)

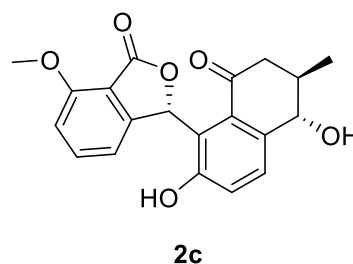

Energy minimized coordinates of donghaecyclinone B at the basis set def-SVP all atoms (Å).

| Atom | X      | Y       | Z       | Atom | X       | Y       | Z       |
|------|--------|---------|---------|------|---------|---------|---------|
| C    | 4.1323 | -1.1919 | -0.3498 | H    | 7.7648  | 0.1202  | 2.4882  |
| C    | 3.3464 | -2.274  | -2.3756 | H    | 7.272   | 1.7848  | 2.1046  |
| C    | 4.6697 | -2.6022 | -2.6974 | H    | 8.4133  | 0.9441  | 1.0381  |
| C    | 5.7209 | -2.2157 | -1.8732 | H    | 1.6212  | -1.0762 | -0.9646 |
| C    | 5.4699 | -1.5125 | -0.6932 | O    | 1.0828  | -0.466  | -2.1483 |
| H    | 4.8702 | -3.1648 | -3.6154 | C    | 0.6258  | -2.1639 | -0.6167 |
| H    | 6.7506 | -2.4538 | -2.139  | C    | 1.6169  | -0.3204 | -0.1708 |
| O    | 2.3159 | -2.6659 | -3.1609 | C    | -0.3943 | -2.1268 | -1.562  |
| H    | 2.6495 | -3.1124 | -3.9502 | O    | -0.0926 | -1.0566 | -2.548  |
| C    | 3.8944 | -0.5504 | 0.9821  | C    | -0.6903 | -0.6869 | -3.5189 |
| C    | 5.0654 | 0.1523  | 1.6609  | C    | -1.4859 | -3.0152 | -1.4859 |
| C    | 6.343  | 0.2768  | 0.8311  | C    | -1.5038 | -3.93   | -0.4177 |
| C    | 6.6278 | -1.0988 | 0.2011  | C    | -0.4664 | -3.9421 | 0.5275  |
| O    | 2.8218 | -0.6077 | 1.5601  | O    | 0.6158  | -3.0614 | 0.4499  |
| O    | 7.8157 | -1.1159 | -0.5692 | H    | -2.326  | -4.6375 | -0.3095 |
| H    | 8.5686 | -1.1167 | 0.034   | H    | 1.4112  | -3.0625 | 1.1966  |
| H    | 6.7141 | -1.8356 | 1.0315  | H    | -0.5177 | -4.6625 | 1.349   |
| C    | 3.0559 | -1.5347 | -1.209  | C    | -2.4352 | -2.9267 | -2.4359 |
| C    | 7.5147 | 0.8066  | 1.6598  | H    | -3.5511 | -3.7889 | -2.3919 |
| H    | 6.1643 | 0.9745  | -0.0066 | H    | -4.1388 | -3.6521 | -1.4663 |
| H    | 5.2675 | -0.4184 | 2.5874  | H    | -3.2532 | -4.8501 | -2.4728 |
| H    | 4.6934 | 1.1337  | 1.9987  | H    | -4.1774 | -3.527  | -3.2547 |

Table S7. ECD calculation of *ent*-donghaecyclinone B (**2d**).

total energy = -1222.730359

kinetic energy = 1211.487262306

potential energy = -2434.217620952

Parameters of Level DFT

DFT settings (Functional B3LYP / Gridsize M3)

Geometry optimization options (Energy 10<sup>-6</sup> Hartree, Gradient norm | dE / dx<sub>xyz</sub> | = 10<sup>-3</sup>

Hartree/Bohr)

Energy minimized coordinates of *ent*-donghaecyclinone B at the basis set def-SVP for all atoms (Å).

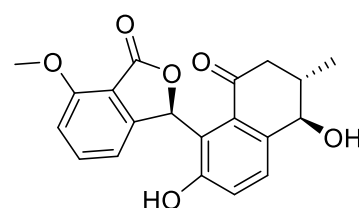

**2d**

| Atom | X       | Y       | Z       | Atom | X       | Y       | Z       |
|------|---------|---------|---------|------|---------|---------|---------|
| C    | 0.6169  | 2.6457  | -0.8909 | H    | 3.3379  | 4.2192  | 0.641   |
| C    | -0.191  | 1.3569  | -0.7784 | H    | 1.9914  | 4.9718  | -0.2347 |
| C    | 0.2405  | 0.3399  | 0.2323  | H    | 4.2778  | 2.1331  | 0.7968  |
| O    | -1.1274 | 1.1754  | -1.5387 | H    | -2.4036 | 0.2637  | -0.0974 |
| C    | 1.7084  | 2.8444  | 0.1607  | O    | -2.8964 | -0.8747 | 1.5394  |
| H    | -0.1092 | 3.4758  | -0.8968 | C    | -2.6022 | -1.8107 | -0.5764 |
| H    | 1.0617  | 2.6392  | -1.904  | C    | -3.5872 | -2.5265 | 0.0973  |
| C    | 2.5029  | 1.5301  | 0.2652  | C    | -3.7586 | -1.9418 | 1.4527  |
| H    | 1.2364  | 3.0041  | 1.147   | O    | -4.4829 | -2.2468 | 2.3578  |
| C    | 2.5933  | 4.0525  | -0.1532 | C    | -4.2471 | -3.609  | -0.5194 |
| C    | 1.5814  | 0.3971  | 0.6882  | C    | -3.8733 | -3.93   | -1.8371 |
| O    | 3.5724  | 1.6053  | 1.1899  | C    | -2.8805 | -3.1889 | -2.4971 |
| H    | 2.9043  | 1.2998  | -0.7479 | C    | -2.2275 | -2.1157 | -1.8842 |
| C    | -0.6348 | -0.6893 | 0.6665  | O    | -5.1891 | -4.2581 | 0.1903  |
| C    | -0.1106 | -1.6998 | 1.5006  | H    | -4.3536 | -4.7561 | -2.3614 |
| C    | 1.2214  | -1.6454 | 1.9311  | H    | -2.621  | -3.463  | -3.5238 |
| C    | 2.0549  | -0.6027 | 1.5406  | H    | -1.4702 | -1.5303 | -2.4076 |
| C    | -2.1248 | -0.7022 | 0.3394  | C    | -5.8939 | -5.3283 | -0.3994 |
| O    | -0.923  | -2.7215 | 1.8581  | H    | -6.4543 | -5.0059 | -1.2959 |
| H    | 1.6003  | -2.4343 | 2.5896  | H    | -6.6057 | -5.684  | 0.3575  |
| H    | 3.0838  | -0.5523 | 1.8968  | H    | -5.2209 | -6.1594 | -0.6783 |
| H    | 3.1274  | 3.9229  | -1.1116 | H    | -0.4704 | -3.3077 | 2.4784  |



Table S8. ECD calculation of donghaecyclinone C (**3c**).

total energy = -1222.729104885

kinetic energy = 1211.475176285

potential energy = -2434.204281170

Parameters of Level DFT

DFT settings (Functional B3LYP / Gridsize M3)

Geometry optimization options (Energy 10<sup>-6</sup> Hartree, Gradient norm | dE / dxyz | = 10<sup>-3</sup>

Hartree/Bohr)

Energy minimized coordinates of donghaecyclinone C at the basis set def-SVP for all atoms

(Å).

| Atom | X       | Y       | Z       | Atom | X      | Y       | Z       |
|------|---------|---------|---------|------|--------|---------|---------|
| C    | 1.6812  | 0.975   | -1.5572 | H    | 5.3866 | -4.841  | -1.2105 |
| C    | 0.79    | 0.1742  | -0.6823 | H    | 7.2009 | -3.5341 | -0.0951 |
| C    | 1.296   | -1.118  | -0.59   | O    | 3.0201 | -3.8529 | -1.9069 |
| O    | 2.6872  | 0.1301  | -1.9837 | H    | 3.326  | -4.7406 | -2.1347 |
| C    | -0.37   | 0.5515  | 0.0227  | C    | 4.585  | 0.263   | 0.2816  |
| C    | -0.9948 | -0.4293 | 0.8152  | C    | 5.8074 | 1.1602  | 0.4438  |
| C    | -0.4682 | -1.7274 | 0.8879  | C    | 7.157  | 0.5107  | 0.1204  |
| C    | 0.6818  | -2.0997 | 0.185   | C    | 7.1484 | -0.9246 | 0.6829  |
| H    | -1.8939 | -0.1904 | 1.3835  | O    | 3.4956 | 0.6409  | 0.6599  |
| H    | -0.9794 | -2.4639 | 1.5146  | O    | 8.3744 | -1.6045 | 0.4814  |
| H    | 1.0797  | -3.1146 | 0.2416  | H    | 9.0256 | -1.2443 | 1.0954  |
| O    | 1.6339  | 2.1196  | -1.9061 | H    | 6.9349 | -0.8589 | 1.7734  |
| O    | -0.8018 | 1.8183  | -0.1106 | C    | 3.787  | -1.8167 | -0.9639 |
| C    | -1.952  | 2.2424  | 0.5876  | C    | 2.5013 | -1.2034 | -1.5039 |
| H    | -1.822  | 2.1566  | 1.6816  | H    | 2.2165 | -1.8201 | -2.3734 |
| H    | -2.8486 | 1.6701  | 0.2876  | C    | 8.33   | 1.346   | 0.6377  |
| H    | -2.0995 | 3.2989  | 0.3268  | H    | 7.2576 | 0.4119  | -0.975  |
| C    | 4.8026  | -1.1125 | -0.2766 | H    | 5.7864 | 1.5265  | 1.4859  |
| C    | 4.0183  | -3.1705 | -1.2752 | H    | 5.6265 | 2.0483  | -0.1863 |
| C    | 5.2315  | -3.7889 | -0.9484 | H    | 8.3092 | 1.4306  | 1.7389  |
| C    | 6.2423  | -3.0673 | -0.3218 | H    | 8.2942 | 2.3686  | 0.2296  |
| C    | 6.0418  | -1.7257 | 0.016   | H    | 9.296  | 0.9083  | 0.3397  |

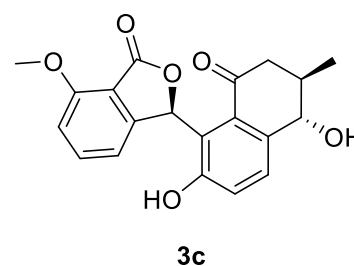

Table S9. ECD calculation of *ent*-donghaecyclinone C (**3d**).

total energy = -1222.729104885

kinetic energy = 1211.475176285

potential energy = -2434.204281170

Parameters of Level DFT

DFT settings (Functional B3LYP / Gridsize M3)

Geometry optimization options (Energy 10<sup>-6</sup> Hartree, Gradient norm | dE / dxyz | = 10<sup>-3</sup>

Hartree/Bohr)

Energy minimized coordinates of *ent*-donghaecyclinone C at the basis set def-SVP for all atoms (Å).

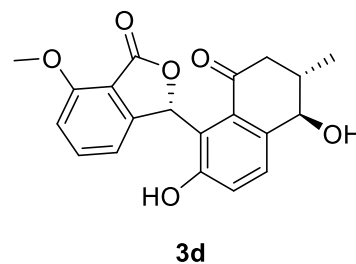

| Atom | X       | Y       | Z       | Atom | X       | Y       | Z       |
|------|---------|---------|---------|------|---------|---------|---------|
| C    | -2.2706 | 1.0815  | 0.1424  | H    | -0.0931 | -1.7961 | -2.5788 |
| C    | -3.4726 | 0.5223  | -0.2975 | C    | 0.989   | -2.3173 | -0.8225 |
| C    | -1.0489 | 0.4713  | -0.2207 | C    | 2.3354  | -1.9709 | -0.862  |
| C    | -3.4677 | -0.6307 | -1.0764 | C    | 2.48    | -0.7001 | -1.6137 |
| C    | -1.0232 | -0.6704 | -1.0539 | O    | 3.4436  | -0.0455 | -1.8905 |
| C    | -2.2562 | -1.2216 | -1.4554 | C    | 0.5374  | -3.4579 | -0.1618 |
| C    | -2.268  | 2.3514  | 0.9918  | C    | 1.4995  | -4.2424 | 0.4821  |
| C    | -1.1332 | 3.2776  | 0.5221  | C    | 3.3072  | -2.7605 | -0.216  |
| C    | 0.1995  | 2.5373  | 0.7044  | C    | 2.8622  | -3.911  | 0.4615  |
| C    | -1.1369 | 4.6285  | 1.239   | H    | -0.5202 | -3.7279 | -0.1454 |
| H    | -1.3029 | 3.4536  | -0.5554 | H    | 1.1892  | -5.143  | 1.0197  |
| C    | 0.1906  | 1.0427  | 0.4029  | O    | 4.59    | -2.3635 | -0.2906 |
| O    | 1.1351  | 0.3489  | 0.7173  | H    | 3.5718  | -4.556  | 0.9798  |
| C    | 0.2305  | -1.2987 | -1.649  | C    | 5.5933  | -3.1125 | 0.3595  |
| O    | -2.225  | -2.3443 | -2.2293 | H    | 6.5414  | -2.5941 | 0.1639  |
| H    | -4.4106 | -1.0702 | -1.4186 | H    | 5.6585  | -4.1423 | -0.0366 |
| H    | -4.4139 | 1.0092  | -0.0396 | H    | 5.4275  | -3.1584 | 1.4511  |
| H    | -3.1215 | -2.5752 | -2.506  | H    | 0.5648  | 2.6384  | 1.742   |
| H    | -0.9947 | 4.5002  | 2.3263  | H    | 0.9893  | 2.9751  | 0.0691  |
| H    | -2.0896 | 5.1527  | 1.0793  | H    | -2.0567 | 2.0797  | 2.0477  |
| H    | -0.3191 | 5.2688  | 0.8707  | O    | -3.5106 | 3.0314  | 0.9176  |
| O    | 1.2123  | -0.3277 | -2.0174 | H    | -4.0421 | 2.801   | 1.688   |
